# Supplementary material for: A comparative ‘omics’ approach for prediction of candidate Strongyloides stercoralis diagnostic coproantigens
Source: PLoS Negl Trop Dis. 2023 Apr 17;17(4):e0010777. doi: 10.1371/journal.pntd.0010777 (PMC10138266; doi:10.1371/journal.pntd.0010777)
Supplement: S2 File — Transcriptomic data from Stoltzfus et al. (2012), gut and non-gut groupings and differential analysis from the present study. Gene accession numbers (starting SSTP) are given for WormBase ParaSite or UniProtKB and life stage transcriptomic data accession numbers (starting ERR) for NCBI SRA. Expression levels are in normalized read counts where red is high and white is low. (XLSX) [file pntd.0010777.s002.xlsx]

## Sheet: DE proteins
(a) Differentailly expressed S. stercoralis genes between gut-dwelling and non-gut dwelling life stages (grey= higher in gut-stages (d)) (n=328)	Gut stages (mean normalized read count)	Non-gut stages (mean normalized read count)	Protein family / Protein feature	(c) Contains BepiPred predicted epitope(s) (n=78)	(c) Contains bcepred predicted epitope(s) (n=62)	Contains signal peptide (n=198)	(b) Occurs in E/S orthologues (n=77)	PF (ERR146959)	PF (ERR146960)	PF (ERR146961)	PPL1 (ERR146953)	PPL1 (ERR146954)	PPL1 (ERR146955)	PPL3 (ERR146956)	PPL3 (ERR146957)	PPL3 (ERR146958)	FLF (ERR146941)	FLF (ERR146942)	FLF (ERR146943)	PFL1 (ERR146950)	PFL1 (ERR146951)	PFL1 (ERR146952)	iL3 (ERR146947)	iL3 (ERR146948)	iL3 (ERR146949)	L3+ (ERR146944)	L3+ (ERR146945)	L3+ (ERR146946)
SSTP_0001053900.1	4671.93	4.31923	Acetylcholinesterase				yes	14121.2	14422.1	13384.2	3.38942	3.52087	2.64403	35.4148	32.0993	42.9036	1.07282	6.17183	2.77684	8.1086	6.01073	7.11864	0	0	1.50184	9.41315	5.04272	4.61365
SSTP_0001144600.1	4763.71	1.10529	Acetylcholinesterase				yes	14470.4	13906.3	14446.1	0.986592	2.16533	0.881343	12.6728	14.004	19.7516	1.78803	2.26594	3.32339	0	0	0	1.28129	0	0	1.55621	0.97601	2.07257
SSTP_0000708100.1	253.258	0.616096	Acetylcholinesterase					873.889	755.017	640.451	2.19596	0.475317	0	0	3.24529	4.05189	0	1.26082	1.08429	0	0.858675	0.79096	0	0	0	0	0.658807	2.7396
SSTP_0000063500.1	3102.68	0.875667	Acetylcholinesterase			yes	yes	9393.68	9301.65	9206.78	1.59128	1.76043	0	5.76037	6.31379	6.62434	1.78803	0.88169	2.64461	0	0	0	0	0	0	1.51825	1.62668	2.04875
SSTP_0000166400.1	7179.5	95.2086	Acetylcholinesterase			yes	yes	21687	22087.9	20646.1	27.8474	28.1669	27.3216	40.3226	36.62	34.2257	7.15211	12.3437	26.4461	67.5717	72.9874	63.2768	25.6258	40.4363	25.5314	327.942	197.642	275.549
SSTP_0000274700.1	2316.21	3.20479	Acetylcholinesterase			yes	yes	6971.54	7153.34	6520.01	3.9782	5.2813	1.76269	76.0369	71.9772	41.9541	4.47007	2.64507	3.52614	7.20765	1.71735	1.58192	0	0	0	6.83212	6.50673	3.97044
SSTP_0000383300.1	19978.9	42.0621	Acetylcholinesterase			yes	yes	60760.7	62146.1	56840.3	1.59128	1.76043	0	34.5622	5.05103	19.873	4.47007	5.29014	7.05229	0	0.858675	1.58192	1.28129	4.85236	0	224.701	90.2809	164.376
SSTP_0000496000.1	12860.8	43.7773	Acetylcholinesterase			yes	yes	38477.6	40619.5	36635.7	0.795639	3.52087	0	4.6083	1.26276	4.41623	1.78803	4.40845	6.17075	0	0.858675	4.74576	0	0	0	214.832	79.7075	212.816
SSTP_0000509400.1	1155.93	1.38397	Acetylcholinesterase			yes	yes	3947.72	3018.49	3389.98	2.78474	3.96097	1.76269	9.79263	14.5217	14.3527	1.34102	1.32253	0.881536	0.900956	0.858675	1.18644	0.640645	0	0	3.0365	3.66004	2.77931
SSTP_0000638700.1	3911.17	1.82797	Acetylcholinesterase			yes	yes	12044.9	11971.1	11144.4	1.59128	0.880216	0.881343	5.76037	10.1021	20.9771	5.36408	5.29014	8.81536	0	0.858675	0	0	0	0	0	0.813342	0.794088
SSTP_0000649200.1	5.53829	26209.4	Acetylcholinesterase			yes	yes	0	6.16774	4.74787	3.18256	2.64065	6.1694	10.3687	8.8393	7.72839	4.47007	6.17183	7.05229	2.70287	4.29338	53.7853	14728.4	30131.5	28575.6	78837.4	82712	79449.3
SSTP_0000670800.1	1808.27	20.6962	Acetylcholinesterase			yes	yes	5230.79	5342.04	5668.6	6.36511	0.880216	3.52537	6.91244	7.57654	7.72839	2.68204	5.29014	1.76307	7.20765	0.858675	0.79096	0	0	0	91.095	54.4939	84.1734
SSTP_0000671000.1	262.114	2.02689	Acetylcholinesterase			yes	yes	734.073	875.412	735.16	0.795639	3.52087	0	6.91244	3.15689	0	3.16481	12.4759	6.21483	0	0	0	0	0	0	2.46716	0	0
SSTP_0001054000.1	2876.35	5.1203	Acetylcholinesterase			yes	yes	9159.56	8947.23	7689.71	1.59128	2.64065	4.40672	21.8894	30.3062	29.8095	3.57605	6.17183	3.52614	0	0	1.58192	0	0	0	13.6642	15.4535	17.4699
SSTP_0001054100.1	1051.23	5.20717	Acetylcholinesterase			yes	yes	3365.31	3213.39	2796.49	7.95639	2.64065	4.40672	27.6498	18.9414	24.2892	5.36408	13.2253	10.5784	0.900956	0.858675	0	1.28129	0	0	16.7007	3.25337	10.3231
SSTP_0001054200.1	4113.28	12.1451	Acetylcholinesterase			yes	yes	12851.5	12640.2	11486.3	1.59128	3.52087	0	8.06452	6.31379	22.0811	10.7282	3.52676	11.46	0	0	0.79096	0	0	0	33.4015	36.6004	49.2335
SSTP_0001054300.1	9611.35	56.6584	Acetylcholinesterase			yes	yes	29028.6	29807.4	27486.6	9.54767	7.92195	7.05075	54.1475	46.722	54.0988	8.94014	14.9887	10.5784	2.70287	0	1.58192	1.28129	4.85236	0	253.548	178.935	202.492
SSTP_0001097600.1	628.071	8.28455	Acetylcholinesterase			yes	yes	1931.02	1950.24	1712.79	4.77383	1.76043	0.881343	24.1936	12.6276	14.3527	2.68204	0.88169	0.881536	2.70287	6.01073	6.32768	0	11.3222	7.50922	25.8102	14.6401	20.6463
SSTP_0001151400.1	1155.93	1.38397	Acetylcholinesterase			yes	yes	3947.72	3018.49	3389.98	2.78474	3.96097	1.76269	9.79263	14.5217	14.3527	1.34102	1.32253	0.881536	0.900956	0.858675	1.18644	0.640645	0	0	3.0365	3.66004	2.77931
SSTP_0000377000.1	23.3259	6442.91	Amino acid permease / Solute carrier family 12					9.9345	3.70064	10.113	23.0258	19.0655	33.2795	39.1936	26.7073	44.913	18.1932	27.7997	25.5645	54.1114	20.7112	28.6486	8260.9	27253.6	41331.3	73.916	119.651	100.492
SSTP_0000261500.1	194.839	1.28674	Aspartic peptidase					646.985	659.948	398.821	1.59128	3.52087	2.64403	18.4332	5.05103	16.5608	2.68204	0.88169	1.76307	0	0.858675	0.79096	1.28129	1.61745	0	1.51825	3.25337	0.794088
SSTP_0001111600.1	292.728	2.87932	Aspartic peptidase					892.864	931.328	802.389	0	0	0	5.76037	0	2.20811	0.894014	0	1.76307	0	0	0	0	1.61745	0	16.7007	3.25337	10.3231
SSTP_0000164500.1	13824.5	55.5128	Aspartic peptidase			yes	yes	47088.5	43484.5	31453.5	18.2997	22.8856	7.05075	788.019	770.282	787.192	30.3965	37.9127	50.2475	10.8115	15.4562	22.1469	0	0	0	189.781	155.348	154.053
SSTP_0000164700.1	12652.4	82.8145	Aspartic peptidase			yes	yes	35767.8	38709.9	39368.6	0.795639	7.92195	0	3.45622	8.8393	4.41623	3.57605	2.64507	3.52614	0	0	0	0	0	1.50184	362.862	300.44	319.223
SSTP_0000377900.1	1.53594	1939.28	Astacin-like metalloendopeptidase				yes	3.72544	1.23355	0	0	0	0.881343	2.30415	1.26276	4.41623	0.894014	4.40845	0	0	0	3.16384	1176.22	3670	2861.01	5410.28	4701.93	5443.47
SSTP_0000440700.1	1074.87	13.2661	Astacin-like metalloendopeptidase				yes	3218.87	3190.55	3145.7	7.95639	12.4199	12.9205	42.8572	20.2041	22.324	8.94014	8.02338	14.7217	40.3989	28.7914	37.0881	6.40645	0	4.50553	3.0365	5.69339	1.58818
SSTP_0000649700.1	275.361	0.906261	Astacin-like metalloendopeptidase				yes	859.806	835.79	777.748	0	0	0	2.30415	1.26276	1.33591	2.66416	0.88169	0	0	0	0	5.47111	0	0	0	0	1.85817
SSTP_0000964800.1	979.813	3.04773	Astacin-like metalloendopeptidase				yes	2934.4	2970.38	2849.91	2.38692	5.2813	5.28806	19.5853	10.1021	20.9771	4.47007	4.40845	7.05229	5.40573	3.4347	1.58192	0	1.61745	0	4.55475	3.25337	0.794088
SSTP_0000965000.1	359.26	3.96776	Astacin-like metalloendopeptidase				yes	1092.8	1142.27	957.882	0	0.880216	0	20.7373	8.8393	9.93651	1.78803	0.88169	0.881536	2.70287	1.71735	1.58192	1.28129	4.85236	1.50184	15.1825	6.50673	8.73497
SSTP_0000966700.1	2033.7	17.6911	Astacin-like metalloendopeptidase				yes	6187.95	6224.48	5837.5	1.59128	0	1.76269	14.977	15.1531	19.873	1.78803	1.76338	4.40768	1.80191	0.858675	1.58192	1.28129	0	7.50922	107.037	37.4137	46.8512
SSTP_0000984600.1	342.526	2.88834	Astacin-like metalloendopeptidase				yes	1092.05	1035.69	953.015	0	0	0.881343	0	0	1.10406	0.0178803	0	0.881536	0	0	0.79096	27.4196	3.23491	1.50184	0	0.813342	0
SSTP_0001115100.1	751.107	8.59356	Astacin-like metalloendopeptidase				yes	2265.63	2295.67	2165.87	1.59128	4.62114	2.89962	10.3687	5.59401	7.72839	5.36408	7.05352	6.43521	7.20765	7.89123	4.83276	12.8129	24.2618	24.0295	0	2.44002	0.794088
SSTP_0001115200.1	1148.25	14.2314	Astacin-like metalloendopeptidase				yes	3432.97	3500.17	3324.8	1.59128	5.84464	7.09481	11.2903	20.9239	29.5666	3.57605	6.96535	5.28922	8.25276	4.52522	8.70056	26.9071	45.2887	52.5646	2.27737	3.25337	3.17635
SSTP_0001126000.1	301.308	4.7703	Astacin-like metalloendopeptidase				yes	871.753	910.358	915.151	0.795639	1.76043	1.76269	2.30415	1.26276	6.62434	10.7282	3.52676	3.52614	0	3.4347	1.58192	3.84387	6.46981	21.0258	1.51825	0	1.58818
SSTP_0001126200.1	533.09	3.55478	Astacin-like metalloendopeptidase				yes	1600.68	1619.65	1561.83	2.98365	1.76043	1.76269	3.45622	1.26276	4.41623	10.7282	7.93521	12.3415	4.50478	1.58855	4.74576	0	0	0	0	0.813342	0
SSTP_0001126300.1	304.938	0.346589	Astacin-like metalloendopeptidase				yes	1039.4	906.657	792.894	0	0	0.881343	4.6083	0	0	0	0	0.881536	0.900956	0	0	0	1.61745	0	0.759125	0	0
SSTP_0001126500.1	292.7	1.62769	Astacin-like metalloendopeptidase				yes	891.572	949.955	778.65	0.795639	0.880216	0.881343	1.15207	3.78827	6.62434	0	0.88169	0	4.50478	8.58675	4.74576	0	0	0	0	0.813342	0
SSTP_0001127700.1	121.498	158086	Astacin-like metalloendopeptidase				yes	95.1353	106.529	107.955	33.9977	48.632	45.7417	262.35	164.487	228.65	386.196	643.025	553.596	22.2356	117.724	600.149	291866	1.00483e+06	596982	332.405	309.558	391.231
SSTP_0001132800.1	0.760346	1050.54	Astacin-like metalloendopeptidase				yes	0	0	0	0	0	1.41015	3.46774	0	1.96522	0	0	0	0	0	8.02824	2650.96	6540.27	3401.39	1.89022	2.48883	1.46906
SSTP_0000955300.1	777.924	1.76607	Astacin-like metalloendopeptidase					2374.35	2336.34	2268.29	0	0	2.64403	6.91244	5.05103	7.72839	3.57605	3.52676	3.52614	0.900956	1.71735	0.79096	0	3.23491	0	1.51825	0.813342	1.58818
SSTP_0001115500.1	2667.99	4.92792	Astacin-like metalloendopeptidase					7963.75	8232.7	7799.56	0.795639	3.52087	0.881343	3.45622	5.05103	2.20811	1.78803	9.69859	4.40768	21.6229	6.8694	3.16384	1.28129	6.46981	1.50184	1.51825	0.813342	0
SSTP_0001151200.1	56.41	0.375305	Astacin-like metalloendopeptidase					172.475	176.003	157.95	0	0	0	0	1.26276	0	0	0	0	0	0	0	2.98541	0	0	1.51825	0	0
SSTP_0000111400.1	3.73569	7910.3	Astacin-like metalloendopeptidase			yes	yes	4.96725	4.93419	2.37393	1.59128	0	0	4.6083	6.31379	8.83245	0.894014	1.76338	6.17075	0.900956	1.71735	0.79096	88.409	270.115	222.273	33141.1	27047.7	34141.8
SSTP_0000364910.2	757.416	3.37901	Astacin-like metalloendopeptidase			yes	yes	2278.73	2280.83	2238.62	0.795639	2.64065	0	3.45622	5.05103	6.62434	2.68204	0	0.881536	0.900956	0.858675	0	2.56258	0	1.50184	15.1825	4.06671	11.9113
SSTP_0000367900.1	1537.75	23.1168	Astacin-like metalloendopeptidase		yes	yes	yes	4447.52	4662.81	4410.77	13.5259	18.4845	5.28806	116.359	56.8241	108.198	18.7743	22.0422	26.4461	24.3258	24.9016	22.1469	12.8129	12.9396	9.01107	45.5475	21.1469	37.3063
SSTP_0000368200.1	18912.9	130.24	Astacin-like metalloendopeptidase			yes	yes	57535.7	58729.2	53893	2.38692	1.76043	2.64403	23.0415	6.31379	22.0811	1.78803	7.93521	2.64461	0	0.858675	1.58192	1.28129	4.85236	0	784.935	244.816	512.187
SSTP_0000382200.1	1883.68	14.0913	Astacin-like metalloendopeptidase			yes	yes	5675.4	5883.16	5220.33	2.38692	1.76043	2.01828	72.4655	24.99	70.5934	17.8803	18.5155	18.5123	2.09923	0	0	0	0	3.12384	36.8175	39.3983	32.7482
SSTP_0000382300.1	6928.5	29.4195	Astacin-like metalloendopeptidase			yes	yes	20727.1	21589.6	19950.5	7.95639	7.92195	6.1694	27.6498	16.4158	23.1852	16.0922	33.5042	33.4984	20.722	6.8694	11.0734	25.6258	40.4363	39.048	40.2336	40.6671	45.263
SSTP_0000386200.1	6.47184	3357.18	Astacin-like metalloendopeptidase		yes	yes	yes	1.24181	3.70064	1.18697	4.77383	3.52087	5.28806	16.129	11.3648	11.0406	1.78803	2.64507	5.28922	1.80191	2.57603	15.8192	10282.4	15331.8	14614.5	6.83212	7.32007	13.4995
SSTP_0000421800.1	4.24135	11049.6	Astacin-like metalloendopeptidase			yes	yes	2.48363	7.40129	5.93483	2.38692	1.76043	1.76269	4.6083	6.31379	5.52028	8.94014	7.93521	8.81536	2.70287	4.29338	14.2373	4620.38	10502.9	10675.4	37340.2	35009.2	34400.1
SSTP_0000421910.1	2.79692	16271.9	Astacin-like metalloendopeptidase			yes	yes	1.24181	0	0	3.18256	0	0	5.76037	5.05103	9.93651	3.57605	3.52676	5.28922	1.80191	1.71735	11.0734	6757.5	25431.7	15387.9	52448.8	47362.6	47847.8
SSTP_0000422100.1	1.59304	55436.3	Astacin-like metalloendopeptidase			yes	yes	0	0	1.18697	0	1.76043	0.881343	2.30415	3.78827	4.41623	1.78803	0.88169	3.52614	10.8115	40.3577	282.373	105386	302576	249920	2445.9	2542.96	2024.92
SSTP_0000422200.1	2.90615	32202.3	Astacin-like metalloendopeptidase			yes	yes	0	0	1.18697	0.795639	3.52087	0	3.45622	5.05103	12.1446	3.57605	1.76338	3.52614	2.70287	14.5975	79.8869	30804.8	68717.5	58872.5	78194.4	68835.9	80896.1
SSTP_0000422300.1	2.02777	2995.14	Astacin-like metalloendopeptidase			yes	yes	0	1.23355	2.37393	2.38692	0.880216	0.881343	5.76037	2.52551	2.20811	0	2.64507	2.64461	0.900956	2.57603	9.49152	12602.8	13973.2	9216.82	47.8249	44.7338	38.1162
SSTP_0000538500.1	2418.82	1.41692	Astacin-like metalloendopeptidase	yes		yes	yes	7301.86	7570.28	6864.23	3.18256	1.76043	0	6.91244	10.1021	11.0406	0.894014	5.29014	7.05229	0	0.858675	0	1.28129	0	0	0	1.62668	0
SSTP_0000538600.1	15114.7	67.6893	Astacin-like metalloendopeptidase			yes	yes	44972.3	47882.6	43072.6	6.36511	2.64065	2.64403	31.106	39.1455	23.1852	35.7605	67.8901	52.0106	0	0.858675	0.79096	156.317	208.651	271.834	6.073	7.32007	4.76453
SSTP_0000667600.1	13285.5	12.7457	Astacin-like metalloendopeptidase			yes	yes	39691.5	41842.8	37962.7	9.54767	3.52087	4.40672	31.106	7.57654	16.5608	18.7743	50.2563	42.3137	0.900956	0	1.58192	14.0942	1.61745	1.50184	8.35037	2.44002	11.1172
SSTP_0000674000.1	3492.78	22.6428	Astacin-like metalloendopeptidase			yes	yes	10793.8	10924.3	9622.74	25.4605	17.6043	12.3388	17.2811	12.6276	8.83245	8.94014	12.3437	12.3415	24.3258	30.9123	45.0847	37.1574	25.8792	25.5314	12.9051	23.5869	12.7054
SSTP_0000809200.1	5555.5	1.47319	Astacin-like metalloendopeptidase			yes	yes	16788.6	17439	15736.8	1.59128	0.880216	2.64403	13.8249	5.05103	11.0406	1.78803	4.40845	0.881536	2.70287	0.858675	0.79096	0	0	0	2.27737	0	3.97044
SSTP_0000871700.1	2.88042	2348.96	Astacin-like metalloendopeptidase			yes	yes	1.24181	3.70064	2.37393	8.75203	0.880216	0.881343	1.15207	2.52551	4.41623	7.15211	7.05352	6.17075	0.900956	0.858675	0	3.84387	90.5774	4.50553	10842.6	8122.03	9101.84
SSTP_0000876500.1	2143.51	15.2956	Astacin-like metalloendopeptidase			yes	yes	6774.09	6812.88	5622.66	11.9346	11.4428	11.4575	13.8249	18.9414	14.3527	6.25809	7.93521	1.76307	1.80191	7.72808	7.9096	6.40645	22.6443	4.50553	55.4161	34.9737	26.2049
SSTP_0001108100.1	201.208	1.82517	Astacin-like metalloendopeptidase			yes	yes	600.951	634.636	540.556	3.9782	2.64065	2.64403	9.21659	6.31379	9.93651	2.68204	3.52676	1.76307	0	0	0.79096	0	0	0	1.82949	8.13342	3.17635
SSTP_0001115210.1	3794.18	6.82698	Astacin-like metalloendopeptidase			yes	yes	11486.8	11769.3	10863.1	1.59128	1.76043	0.881343	10.3687	5.05103	8.83245	23.2444	17.6338	20.2753	3.60382	2.57603	1.58192	1.28129	0	1.50184	3.79562	3.25337	3.17635
SSTP_0000538400.1	286.647	1.35351	Astacin-like metalloendopeptidase			yes		892.864	873.352	784.585	1.59128	0.880216	0.881343	10.3687	7.57654	7.72839	0	4.40845	3.52614	0	0	0	1.28129	0	0	3.0365	0.813342	3.17635
SSTP_0001115600.1	432.918	2.73676	Astacin-like metalloendopeptidase			yes		1379.65	1260.69	1249.88	0	1.76043	0.881343	2.30415	0	1.10406	3.57605	1.76338	7.05229	0	0	0	0	1.61745	1.50184	3.0365	0	14.2936
SSTP_0001052900.1	268.084	0.221449	CAP domain					804.943	835.112	767.967	0	0	0	0	2.52551	2.20811	0.894014	1.76338	0	0	0	0	0	0	0	0	0	0
SSTP_0001131500.1	179.624	0.430468	CAP domain					507.902	523.024	569.744	0	0.880216	0	5.76037	3.78827	5.52028	0.894014	1.76338	0.881536	0	0	0	0	0	0	0	1.62668	0
SSTP_0001053200.1	158.204	0.47434	CAP domain			yes		501.692	482.317	428.495	0	0	0.881343	4.6083	2.52551	3.31217	0.894014	0	0	0.900956	0	1.58192	0	0	1.50184	0	0.813342	0
SSTP_0001131600.1	268.698	2.56463	CAP domain			yes		761.231	869.651	778.65	0	0.880216	0.881343	1.15207	2.52551	3.31217	0	0.88169	1.76307	0	0.858675	0	1.28129	3.23491	0	7.59125	3.25337	11.9113
SSTP_0001131700.2	103.249	0.276109	CAP domain			yes		336.531	304.686	282.498	0.795639	0	0	0	2.52551	2.20811	0	0.88169	0.881536	0	0	0.79096	0	0	0	0.759125	0	0
SSTP_0001148000.1	966.135	3.8853	CAP domain			yes		3063.69	2841.76	2766.01	3.18256	2.64065	3.52537	3.45622	6.31379	4.63704	1.34102	0.88169	0.440768	6.95538	11.9613	14.2373	0	0	0	5.31387	3.90404	1.58818
SSTP_0000032300.1	3.82137	3366.95	collagen	yes	yes			1.24181	1.23355	1.18697	1.59128	6.16151	6.1694	5.76037	8.8393	2.20811	0.894014	0	0.881536	1.80191	1.71735	0	19.2194	9.70472	7.50922	16976.3	11578.8	11806.5
SSTP_0000303800.1	465.46	6.11769	collagen					1297.74	1668.88	1215.01	0.795639	0	0.881343	3.45622	1.26276	1.10406	0	0.88169	0	0	0	0	0	0	0	23.5329	23.5869	25.4108
SSTP_0000303850.1	1955.92	0.627079	collagen					5697.44	6428.09	5474.42	0	0	0	0	0	3.31217	0	0	0.881536	0	0	0	5.12516	0	0	1.51825	0	0
SSTP_0000304000.1	143.583	1.03821	collagen					428.376	456.437	403.865	0	0	0	2.30415	1.26276	0	0	0	0	0	0	0	0	1.61745	0	6.83212	1.62668	2.38226
SSTP_0000405700.1	30.0884	11540.9	collagen	yes				40.9798	43.1742	34.422	54.8991	26.4065	24.6776	11.5207	21.4669	13.2487	11.6222	18.5155	24.683	13.5143	14.5975	18.983	99920.1	29934.2	8375.79	61.4891	56.1206	41.2926
SSTP_0000504000.1	294.427	3.07039	collagen	yes				859.335	936.263	840.372	1.59128	0.880216	0	1.15207	2.52551	7.72839	0.894014	2.64507	2.64461	1.80191	0	0	2.56258	16.1745	4.50553	0	2.44002	3.17635
SSTP_0000504200.1	260.585	1.10974	collagen	yes	yes			803.453	824.01	715.741	0.795639	0	0	0	1.26276	0	0.894014	1.76338	0.881536	0	0	0	1.28129	0	1.50184	4.55475	2.44002	0
SSTP_0000530900.1	1.51775	547.924	collagen		yes			0	1.85032	4.74787	0.795639	0	0	1.53226	2.52551	2.20811	0.894014	0.88169	0	0	0	0	466.736	1445.03	1843.69	696.095	1169.85	951.913
SSTP_0000711400.1	118.876	0.361511	collagen		yes			331.49	409.698	323.721	0.795639	0.880216	0.881343	1.15207	1.26276	0	0.894014	0	0.881536	0	0	0	2.56258	0	0	0	0	0
SSTP_0000711600.1	1135.69	7.42517	collagen					3367.8	3626.63	3224.99	0	0.880216	0.881343	0	0	0	0.894014	0	0	0	0	0.79096	1.28129	1.61745	1.50184	32.6424	14.6401	35.734
SSTP_0000795700.1	86.0713	46296.7	collagen	yes				63.3325	93.7496	59.3483	85.929	73.058	92.541	120.968	98.4951	87.2204	81.3552	97.8676	91.6797	97.3032	58.3899	74.3502	543494	8491.63	2482.55	186.745	221.229	183.434
SSTP_0000828400.1	0.882026	6996.81	collagen	yes	yes			0	0	1.18697	0	0.880216	0	4.6083	1.26276	0	0	0	0	0	0.858675	0	11.5316	12.9396	10.5129	32417.7	27459.2	24049
SSTP_0000877500.1	49.0081	18374.3	collagen	yes				1.24181	7.40129	2.37393	15.9128	242.94	112.812	23.0415	26.5179	8.83245	3.57605	7.05352	2.64461	4.50478	5.15205	3.16384	217169	2668.8	620.262	2.27737	0.813342	3.97044
SSTP_0000946700.1	2.04535	1821.46	collagen	yes	yes			0	0	0	0	1.76043	0.881343	3.45622	10.1021	2.20811	0	0	0.881536	0	0	0	6.40645	0	0	8850.99	6065.62	6933.6
SSTP_0001040300.1	1.98998	15157	collagen	yes	yes			1.24181	0	0	0	1.76043	1.76269	1.15207	7.57654	4.41623	1.78803	1.76338	1.76307	3.60382	0.858675	0.79096	5.12516	0	4.50553	64859	60906.3	56099
SSTP_0001270300.1	291.685	0.25756	collagen		yes			843.191	949.832	830.876	0	0	0	0	1.26276	0	0	0	0	0	0	0	0	0	0	2.27737	0.813342	0
SSTP_0000037300.1	34.9852	0.0734613	collagen		yes	yes		105.107	97.0309	111.848	0	0	0.881343	0	0	0	0	0	0.881536	0	0	0	0	0	0	0	0	0
SSTP_0000306900.2	2726.48	44.7013	collagen	yes		yes		8123.94	8437.47	7569.28	69.2206	67.7767	99.5918	54.1475	51.773	65.1393	21.4563	20.2789	10.5784	73.8784	75.5634	79.8869	55.0955	22.6443	69.0849	45.5475	19.5202	42.8808
SSTP_0000520100.1	1420.49	8.17204	collagen			yes		7.45088	7.40129	8.30876	3.18256	3.52087	10.5761	5603.69	3656.95	3483.3	9.83415	15.8704	25.5645	0.900956	12.0215	2.37288	20.5006	0	1.50184	1.51825	1.62668	6.35271
SSTP_0000538000.1	439.517	1.85261	collagen		yes	yes		1332.47	1364.3	1245.13	4.77383	0	4.40672	0	1.26276	3.31217	0.894014	1.76338	0	0	0	0	0	1.61745	0	8.35037	3.25337	6.35271
SSTP_0000538100.1	1375.86	3.36917	collagen	yes	yes	yes		4126.54	4360.59	3861.2	8.75203	1.76043	3.52537	8.06452	1.26276	11.0406	1.78803	0.88169	0.881536	0	0	0	2.56258	3.23491	1.50184	16.7007	7.32007	5.55862
SSTP_0000608900.1	5.24953	9702.35	collagen			yes		4.96725	12.3355	3.5609	9.54767	1.76043	4.40672	2.30415	5.05103	3.31217	4.47007	6.17183	5.28922	2.70287	4.29338	4.74576	3664.49	37748.1	74954.1	13.6642	12.2001	7.94088
SSTP_0000610400.1	7.08492	6076.45	collagen			yes		4.96725	6.16774	5.93483	1.59128	3.52087	4.40672	13.8249	10.1021	13.2487	447.901	193.09	332.339	3.60382	6.01073	4.74576	11854.5	30864.2	29057.7	59.2117	47.9871	46.0571
SSTP_0000701700.1	3.63212	62263	collagen	yes		yes		0	2.4671	2.37393	0.795639	0.880216	2.64403	8.06452	8.8393	6.62434	0	1.76338	0	2.70287	2.57603	2.37288	11.5316	29.1142	22.5277	254041	277371	215672
SSTP_0000731700.1	32.1833	4719.99	collagen			yes		8.69269	17.2697	11.8697	2.38692	116.189	23.7963	28.8019	61.8751	18.769	2.68204	0	1.76307	6.30669	1.71735	13.4463	15476.7	17073.8	16520.3	2817.11	2463.61	2262.36
SSTP_0000828300.1	0.250681	17822.3	collagen		yes	yes		0	0	0	0	0	0	1.15207	0	1.10406	0	0	0.881536	0	0	0	110.191	80.8726	141.173	77797.4	80174.3	55562.4
SSTP_0000863600.1	804.852	0.678835	collagen	yes		yes		2507.22	2644.73	2079.57	0	0	2.64403	1.15207	5.05103	3.31217	0	0	0	0.900956	1.71735	0.79096	0	3.23491	1.50184	0	0	0
SSTP_0000863700.1	0.459499	44516.3	collagen	yes	yes	yes		0	0	2.37393	0	0.880216	0.881343	0	0	0	1.78803	3.52676	0	2.70287	0.858675	3.16384	8.96903	0	4.50553	187943	168731	177496
SSTP_0000940000.2	3567.53	48.8696	collagen	yes	yes	yes		10713.1	11069.9	10137.9	40.5776	21.1252	24.6776	46.083	29.0434	25.3933	28.6084	17.6338	16.7492	47.7507	19.7495	18.1921	23.0632	17.792	19.524	136.642	105.734	134.995
SSTP_0000946400.1	0.945182	12819.6	collagen	yes	yes	yes		1.24181	1.23355	2.36206	0.803595	0.880216	0.881343	0	0	1.10406	0.894014	0.88169	0.881536	0	0.858675	0	87.3712	66.3156	67.7632	53972.5	48790	50847.8
SSTP_0000946500.1	1.53982	7219.96	collagen	yes	yes	yes		0	0	0	0	0.880216	0	2.30415	7.36188	3.31217	0	0	0.881536	0	0	0	8.72559	8.08726	2.82347	29776	28814.7	28028.2
SSTP_0000946600.1	1.16229	13591.6	collagen	yes	yes	yes		0	0	0	0	0	0	1.15207	3.78827	5.52028	0	1.76338	0	0	0	0	0	0	0	59992	52262.9	50842.7
SSTP_0001038100.1	1302.09	0.514293	collagen			yes		3802.43	4231.07	3674.85	0	0	0	5.76037	2.52551	2.20811	0	4.40845	1.76307	0	0	0	0	0	0	0	0	0
SSTP_0001040400.1	1.68545	11055.5	collagen	yes	yes	yes		2.48363	2.4671	0	0.795639	0.880216	0	2.54608	3.78827	2.20811	1.78803	0.88169	2.64461	0	0.858675	0	34.5948	9.70472	45.0553	46419.2	45034	41117
SSTP_0001040500.1	2.4083	14073	collagen	yes	yes	yes		1.24181	1.23355	1.19884	1.58332	0.880216	0.881343	5.76037	7.79121	1.10406	1.78803	3.52676	0.881536	0	0	0	21.7819	6.46981	15.0184	58675.7	56068.8	54082.5
SSTP_0001040600.1	11.6511	7666.5	collagen	yes	yes	yes		2.48363	2.4671	3.5609	4.77383	16.7241	43.1858	4.36636	15.1531	12.1446	4.47007	2.64507	1.76307	44.1468	22.3256	29.2655	116.597	140.718	144.177	34340.5	26751	30400.5
SSTP_0001040700.1	1.20955	10194.5	collagen	yes	yes	yes		1.24181	0	0	0.795639	0	1.76269	3.45622	2.52551	1.10406	0.894014	1.76338	0	0	0	0.79096	20.5006	8.08726	6.00738	38279.8	45383.2	38632.9
SSTP_0001073300.1	100.155	0.28701	collagen		yes	yes		291.218	301.504	300.813	0.795639	0	0	2.32719	2.52551	2.20811	0	0	0.881536	0	0	0	2.56258	0	0	0	0	0
SSTP_0000270800.1	0.592355	11779.4	consensus disorder prediction	yes				1.24181	0	0	0	1.94528	0.881343	0	1.26276	0	0	0	0	0	8.9474	35.2056	38229.9	57795.7	44721.9	171.448	255.194	134.145
SSTP_0000367400.1	2.64325	33683.3	consensus disorder prediction					0	1.23355	1.18697	1.59128	1.76043	1.76269	11.5207	2.52551	2.20811	223.503	303.301	248.593	1.80191	13.7388	109.152	59485.2	146106	123312	26429.7	23554.4	24411.9
SSTP_0000390700.1	3200.54	11.2151	consensus disorder prediction		yes			9388.11	10731.9	8652.98	2.38692	5.2813	0.881343	8.06452	7.57654	7.72839	2.68204	1.76338	3.52614	0.900956	1.71735	2.37288	23.0632	29.1142	22.5277	20.4964	8.94676	17.4699
SSTP_0000492200.1	0.131885	3091.73	consensus disorder prediction					0	0	1.18697	0	0	0	0	0	0	0	0	0	0	0	0	0	3.23491	1.50184	12047.3	17042.8	8006
SSTP_0000503100.1	34525.4	18.6833	consensus disorder prediction	yes	yes			103602	110966	96145.5	1.59128	3.52087	0.881343	3.45622	2.52551	3.31217	3.57605	5.29014	3.52614	0.900956	0.858675	0.79096	6.40645	1.61745	4.50553	91.8541	35.787	69.0857
SSTP_0000506400.1	0.706407	17296.5	consensus disorder prediction		yes			1.24181	1.23355	1.18697	1.59128	0	0	0	0	1.10406	2.68204	0.88169	0	0	0	0	21.7819	11.3383	18.0221	67636.1	77412.8	62454.6
SSTP_0000506800.1	2.64554	8240.55	consensus disorder prediction	yes	yes			6.20906	2.4671	5.93483	0.795639	0.880216	1.76269	5.76037	0	0	0.894014	3.52676	0.881536	1.80191	0.858675	0	1.28129	0	0	32709.1	36141.3	30027
SSTP_0000506900.3	0.570469	37992.1	consensus disorder prediction	yes	yes			2.48363	1.23355	0	0	0	0	1.41705	0	0	0.894014	2.23068	1.76307	0	0.858675	0	6.40645	1.61745	0	153308	162735	139848
SSTP_0000635650.1	5531.63	0.0734742	consensus disorder prediction					16312.5	18371.2	15097	1.59128	0	0	1.15207	1.26276	0	0	0.88169	0	0	0	0	0	0	0	0	0	0
SSTP_0000667700.1	0.695911	42090.7	consensus disorder prediction					0	2.4671	0	0	0	2.64403	1.15207	0	0	0	0	0	3.60382	16.3148	102.034	53030	247868	194519	3673.4	3115.91	2759.46
SSTP_0000671200.1	2.17055	2637.24	consensus disorder prediction	yes				7.45088	3.70064	1.18697	0	0	0	2.30415	3.78827	1.10406	0.894014	0.88169	3.52614	0	0	0	0	0	0	9004.74	12942.6	9694.2
SSTP_0000671400.1	2.50036	6898.87	consensus disorder prediction	yes				3.72544	3.70064	8.30876	0	0	0	3.45622	0	3.31217	0	0.88169	1.76307	0	0	0	0	0	0	28789.4	26947.6	27046.7
SSTP_0000671500.2	1.35273	12090.8	consensus disorder prediction		yes			1.24181	0	1.18697	0	0	1.76269	2.30415	1.26276	4.41623	0	0	2.64461	0.900956	0	0	12.8129	9.70472	3.00369	48516.8	50733.8	45810.1
SSTP_0000674400.1	1.03899	10734.4	consensus disorder prediction	yes	yes			2.48363	2.4671	0	0	0	0.881343	1.15207	1.26276	1.10406	1.78803	0.88169	4.40768	0	0	0	67.9084	12.9396	105.129	43258.1	44683.9	40678
SSTP_0000677000.1	2495.28	0.274496	consensus disorder prediction	yes				7526.63	7855.23	7073.13	0	0	0	0	2.52551	0	0.894014	0.88169	0	0	0	0	0	0	0	1.51825	0	0
SSTP_0000677200.1	1.29501	22085.9	consensus disorder prediction	yes	yes			2.48363	6.16774	0	0.795639	0	0	0	0	2.20811	0.894014	1.76338	0	0	0	0	1.28129	3.23491	0	87635.6	93936.2	83452.2
SSTP_0000677500.1	3.61342	5013.17	consensus disorder prediction	yes				2.48363	4.93419	2.37393	1.59128	3.52087	2.64403	3.45622	3.78827	7.72839	0	3.52676	0.881536	0	0	0	0	0	0	21413.7	19490.1	19249.9
SSTP_0000808800.1	0.385652	2019.22	consensus disorder prediction	yes	yes			0	0	0	0	0	0	0	1.26276	2.20811	0	0	0	0.900956	1.71735	6.24858	6213.44	11040.3	6912.59	24.4438	19.3494	11.6413
SSTP_0000811600.1	16.879	52372.2	consensus disorder prediction	yes	yes			9.9345	7.40129	8.30876	0	25.5263	14.9828	43.7673	17.6786	24.3113	0.894014	11.462	9.6969	10.7754	44.6339	148.843	206100	229410	191243	462.914	606.525	417.317
SSTP_0000830700.1	1145.49	9.61331	consensus disorder prediction		yes			3378.97	3351.55	3480.19	11.1389	8.80216	7.05075	28.8019	16.4158	26.4974	25.9264	39.676	29.9722	0.900956	2.57603	2.37288	2.56258	0	4.50553	6.073	0	0.794088
SSTP_0001211500.1	77277.4	260.424	consensus disorder prediction	yes		yes	yes	233472	226077	235632	30.2343	18.4845	44.0672	141.705	29.0434	51.8906	1565.42	734.448	573.88	33.3354	30.9123	54.5762	29.4697	30.7316	67.583	1.51825	1.62668	1.58818
SSTP_0000165100.1	6.61506	41605.1	consensus disorder prediction	yes	yes	yes		1.37841	8.0674	2.52824	3.27803	3.13357	2.38844	7.88019	11.2512	19.6301	15.3234	8.84335	12.1035	0.900956	5.15205	1.78757	2.56258	0	1.72712	172987	160649	165577
SSTP_0000355800.1	7.16568	20796.7	consensus disorder prediction			yes		16.1436	28.3716	14.2436	0	0.880216	2.64403	0	0	2.20811	0	0	0	2.70287	4.29338	34.0113	20270	37007.3	34479.3	56596.5	49326.7	51839.7
SSTP_0000380900.1	3674.03	1.46271	consensus disorder prediction			yes		11034.8	11570.7	10444.1	1.59128	0.880216	3.52537	3.45622	5.05103	2.20811	3.57605	4.40845	1.76307	0	0	2.37288	3.84387	0	0	0	0	1.58818
SSTP_0000385700.1	17.25	6358.74	consensus disorder prediction	yes		yes		48.4307	44.4077	41.5438	0.795639	9.68238	3.52537	5.76037	0	1.10406	0	0	1.76307	0	6.8694	11.8644	36457.8	23521	16171.9	47.0657	34.9737	51.6157
SSTP_0000390400.1	3821.35	0.998291	consensus disorder prediction			yes		11450.8	12381.1	10550.9	0	0	0	4.6083	2.52551	2.20811	0	1.76338	0	0	0	0	0	1.61745	0	3.79562	1.62668	3.17635
SSTP_0000492900.1	0.723652	310.696	consensus disorder prediction		yes	yes		0	1.23355	0	0	1.76043	0	1.15207	1.26276	1.10406	0	0.88169	0	0	0	0	0	0	0	1428.67	734.447	1564.35
SSTP_0000505500.1	2526.07	4.28451	consensus disorder prediction		yes	yes		7881.79	8135.25	6713.48	0.795639	0	0	1.15207	0	2.20811	0	0	0	0.900956	0	0	1.28129	1.61745	0	21.2555	6.50673	19.8522
SSTP_0000505800.1	0.140306	1230.27	consensus disorder prediction		yes	yes		0	0	0	0	0	0	0	1.26276	0	0.894014	1.76338	1.76307	0	0	0	84.5652	163.363	348.428	5092.97	4570.98	4498.51
SSTP_0000506500.1	0.128008	18629	consensus disorder prediction		yes	yes		0	0	0	0	0	0	1.15207	0	0	0	0	2.64461	0	0	0.79096	0	0	0	72444.9	82831.9	68267.6
SSTP_0000506600.1	3.69973	19457.8	consensus disorder prediction	yes	yes	yes		6.20906	9.86838	8.30876	0	0.880216	0	3.45622	1.26276	3.31217	0.894014	0.88169	0.881536	0	0	0	12.8129	9.68854	3.00369	73320.4	88005	72139.9
SSTP_0000506700.1	2.36355	9647.8	consensus disorder prediction	yes	yes	yes		6.20906	3.70064	7.1218	0	0.880216	0	1.15207	0	2.20811	0.894014	0	0	0	0	0	2.56258	1.61745	0	35769.2	43870.7	36128.6
SSTP_0000509500.1	0.211077	17680.7	consensus disorder prediction	yes	yes	yes		0	0	0	0.795639	0	0	0	0	1.10406	0.894014	0	0	0	0	0	0	0	0	65611.1	82694.9	63862
SSTP_0000623900.1	6738.73	4.61805	consensus disorder prediction	yes		yes		20205.5	21305.8	19106.6	0.795639	3.52087	0.881343	10.3687	5.05103	9.93651	3.57605	2.64507	3.52614	3.60382	0.858675	3.16384	15.3755	4.85236	3.00369	6.83212	1.62668	6.35271
SSTP_0000635500.1	3.33903	30358.1	consensus disorder prediction			yes		12.4181	9.86838	3.5609	0.795639	0	0	2.30415	0	1.10406	0	1.76338	0	0	0	2.37288	174.255	271.732	315.387	125431	128832	109268
SSTP_0000638400.1	0.26377	263.754	consensus disorder prediction			yes		0	0	2.37393	0	0	0	0	0	0	0.894014	0	0	0	0	0	0	0	0	1027.35	951.065	1185.74
SSTP_0000666500.1	2.05066	18416.5	consensus disorder prediction	yes	yes	yes		2.48363	2.4671	1.18697	0	0.880216	0.881343	3.45622	3.78827	3.31217	1.78803	0.88169	0.881536	0	0	0.79096	115.316	150.423	129.159	75888	75421.5	69289.8
SSTP_0000671300.1	0.845615	317.888	consensus disorder prediction			yes		3.72544	0	0	0.795639	0	0.881343	0	0	2.20811	0.894014	0	0.881536	0	0	0	1.28129	0	0	1401.85	1011.53	1398.22
SSTP_0000676800.1	1712.71	0.284105	consensus disorder prediction			yes		4932.48	5436.24	5041.05	0.795639	1.76043	0.881343	1.15207	0	0	0	0	0	0.900956	1.71735	0.79096	0	0	0	0	0	0
SSTP_0000676900.1	4772.25	0.417538	consensus disorder prediction	yes		yes		14473.3	14817.4	13658.4	0	0	0	1.15207	0	0	0.894014	0	0.881536	0	0	0	0	3.23491	0	0	0	0
SSTP_0000677300.1	0.195854	63161.4	consensus disorder prediction	yes	yes	yes		0	0	0	0	0	1.76269	0	0	0	0	0.88169	0.881536	0	0	0	0	0	0	253813	273453	230669
SSTP_0000677400.1	3.46399	15008.1	consensus disorder prediction		yes	yes		11.1763	7.40129	8.30876	0	0	0.881343	2.30415	0	1.10406	0	1.76338	0.881536	0.900956	0	0	0	0	0	59224.1	63460.1	57409.4
SSTP_0000677600.1	0.725529	8971.37	consensus disorder prediction	yes		yes		0	0	2.37393	0.795639	0	0	1.15207	0	2.20811	0	2.64507	1.76307	0	0	0	0	0	0	35405.1	39159.6	33087.3
SSTP_0000677700.1	0.476306	11088.6	consensus disorder prediction			yes		0	0	1.18697	0.795639	0	0	2.30415	0	0	0	0	0.881536	0	0	0.79096	0	0	0	45294.3	42803.2	44963.6
SSTP_0000677800.1	0.378689	406.432	consensus disorder prediction	yes	yes	yes		0	0	0	0	0	0	2.30415	0	1.10406	0	0	0	0	0	0	1.28129	1.61745	0	1527.34	1710.68	1636.27
SSTP_0000677900.2	3.48521	35562.7	consensus disorder prediction	yes		yes		0	2.4671	2.37393	2.38692	0.880216	0	9.21659	6.31379	7.72839	1.78803	1.76338	5.28922	0	0	0	2.56258	4.85236	3.00369	143640	154374	128719
SSTP_0000678300.1	4823.91	1.80489	consensus disorder prediction			yes		13976.7	15559.8	13877.5	0	0	0	1.15207	0	0	0.894014	0.88169	1.76307	0	0	0	0	3.23491	0	6.073	3.25337	5.55862
SSTP_0000685000.1	270.135	3.37471	consensus disorder prediction			yes		769.924	899.256	762.032	0	0	0	0	0	0	0	0	0	0.900956	0	0.79096	1.28129	3.23491	3.00369	12.9051	4.88005	13.4995
SSTP_0000738500.1	3824.36	22.3847	consensus disorder prediction	yes		yes		11324.1	12113.4	10854.8	14.3215	13.2032	19.3896	21.8894	31.5689	26.4974	13.4102	18.5155	13.223	36.9392	20.6082	20.565	57.6581	32.3491	31.5387	5.31387	9.7601	8.73497
SSTP_0000828100.1	1822.15	3.95123	consensus disorder prediction	yes	yes	yes		5473.22	5683.89	5213.29	3.18256	1.76043	4.40672	9.21659	3.78827	6.62434	2.68204	6.17183	5.28922	0	0	0.79096	0	0	0	22.0146	5.70152	4.76453
SSTP_0000859300.1	11.7936	63951.2	consensus disorder prediction	yes		yes		0	1.23355	0	25.4605	16.7241	13.2201	21.8894	17.6786	9.93651	6.25809	6.17183	1.76307	12.6134	12.0215	10.2825	367.73	317.021	1326.13	251737	279902	233715
SSTP_0000953600.1	9.28826	18658.1	consensus disorder prediction		yes	yes		11.1763	9.86838	10.6827	11.1389	7.92195	0.881343	12.6728	12.6276	6.62434	0.894014	6.17183	2.64461	12.6134	7.72808	3.16384	15.3755	17.792	25.5314	80206.1	71043.8	72555.8
SSTP_0000962100.1	1492.91	0.262078	consensus disorder prediction			yes		4620.79	4772.6	4042.81	0	0	0	0	0	0	0	0	0	0	0	0	0	0	0	1.51825	1.62668	0
SSTP_0001019700.1	1.35176	49696.3	consensus disorder prediction	yes		yes		6.20906	3.70064	0	0	0	0	1.15207	0	1.10406	0	2.64507	0	0.900956	0	0	192.194	122.926	1612.98	210040	218500	165884
SSTP_0001026400.1	9.34269	14199.2	consensus disorder prediction			yes		2.48363	2.4671	3.5609	9.54767	8.80216	15.8642	8.06452	18.9414	14.3527	14.3042	26.4507	11.46	25.2268	30.0536	19.774	29.4697	0	7.50922	65290.8	50115.7	54819.9
SSTP_0001026600.1	3.81454	13643.4	consensus disorder prediction			yes		2.48363	1.23355	1.18697	0.795639	1.76043	5.28806	6.91244	2.52551	12.1446	2.68204	0.88169	0.881536	5.40573	5.15205	7.9096	10.2503	0	1.50184	60430.9	50339.3	52916.4
SSTP_0001103800.1	20.3197	88750.3	consensus disorder prediction	yes	yes	yes		26.0781	27.138	33.2351	41.3732	16.7241	13.2201	8.06452	12.6276	4.41623	8.94014	7.05352	7.93382	9.00956	47.2271	226.214	211870	438969	412974	242.92	326.963	314.459
SSTP_0001131100.1	8316.5	4.01384	consensus disorder prediction	yes	yes	yes		24402.9	26727.3	23708.5	4.77383	0.880216	0.881343	1.15207	0	2.20811	0.894014	3.52676	1.76307	0	0	0	2.56258	4.85236	1.50184	24.292	1.62668	7.14679
SSTP_0001131200.1	5312.37	0.210931	consensus disorder prediction	yes	yes	yes		15810.8	17136.4	14859.6	0	0	0	1.15207	0	3.31217	0	0	0.881536	0	0.858675	0.79096	0	0	0	0	0	0
SSTP_0001147700.1	4822.28	9.18608	consensus disorder prediction	yes		yes		15125.3	14880.3	13394.9	0	0	0	0	0	0	38.4426	29.9775	37.0245	0	0.858675	0	0	1.61745	0	1.51825	0	0.794088
SSTP_0001213100.1	10037.7	10.2971	consensus disorder prediction	yes		yes		30238.1	31593.6	28486	2.38692	0.880216	1.76269	4.6083	3.78827	7.72839	2.68204	3.52676	2.64461	2.70287	6.01073	1.58192	17.9381	0	0	31.8832	25.2136	29.3813
SSTP_0000644100.1	111.243	17939.1	consensus disorder prediction / Proline rich extensin signature	yes		yes		24.8363	24.671	17.8045	2.38692	4.40108	0	805.3	29.0434	92.7407	72146.9	80816.6	62138.6	8.1086	103.041	40.3389	11.5316	0	0	0.759125	1.62668	1.58818
SSTP_0001226800.1	57.4941	488781	consensus disorder prediction / Proline rich extensin signature	yes		yes		55.8816	39.4859	53.4135	1.59128	87.8368	70.5075	69.1129	56.8241	82.7932	4.47007	8.8169	5.28922	85.789	364.284	1662.39	1.54642e+06	2.42043e+06	1.88395e+06	3745.42	5171.4	3526.73
SSTP_0000466600.1	1.35617	470.199	Cystein-rich secretory proteins					1.24181	0	3.5609	0.795639	0.880216	0	1.15207	1.26276	3.31217	0	0.88169	0.881536	0	0	0	0	0	0	2193.5	1930.68	1516.45
SSTP_0000829300.1	1.02914	1169.72	Cystein-rich secretory proteins					0	1.23355	0	0	0.880216	0	1.15207	3.78827	2.20811	0	0.88169	2.64461	0	0	0	32.0323	27.4967	58.5719	5080.82	4157.8	4676.39
SSTP_0000829400.1	2.19617	1444.63	Cystein-rich secretory proteins					0	0	0	0	0	0	8.24885	3.78827	7.72839	2.68204	1.76338	0	0	0.858675	12.6554	2102.73	9004.25	6041.38	42.511	87.0275	39.7044
SSTP_0000843900.1	4.99336	1399.84	Cystein-rich secretory proteins					4.96725	4.93419	3.5609	0	0	0	5.76037	11.3648	14.3527	0.894014	1.76338	4.40768	0.900956	1.71735	0	16.6568	12.9396	6.00738	5969.37	5469.1	5314.3
SSTP_0001127400.1	5.5642	2856.51	Cystein-rich secretory proteins	yes				2.48363	2.4671	0	0	1.76043	0.881343	14.4009	12.6276	15.4568	0.894014	2.64507	0.881536	0.900956	0	12.6554	5299.4	19017.8	9055.4	268.054	330.461	288.977
SSTP_0001129300.1	9.63958	1921.12	Cystein-rich secretory proteins	yes				1.24181	0	2.37393	1.59128	1.76043	0.881343	19.5853	23.9924	35.3298	6.25809	7.93521	2.64461	0.900956	0.858675	4.74576	1188.46	6660.46	2682.05	4362.68	4364.28	3772.15
SSTP_0000847900.1	5.07406	14166.8	Cystein-rich secretory proteins	yes		yes		1.24181	4.93419	0	0	0.880216	1.76269	28.8019	2.52551	5.52028	40.2306	122.555	98.732	0.900956	4.29338	60.1129	25255.5	81582.7	62807.1	14.4234	6.50673	8.73497
SSTP_0000848000.1	6.71526	1734.66	Cystein-rich secretory proteins	yes		yes		2.48363	3.70064	2.37393	1.59128	5.2813	3.52537	14.977	8.8393	17.6649	50.0648	78.4704	56.4183	1.80191	3.4347	18.1921	5478.8	6075.15	9026.09	10.6277	9.7601	7.14679
SSTP_0000851500.1	7.49118	14199.1	Cystein-rich secretory proteins			yes		8.69269	11.1019	8.13072	15.1171	12.323	6.1694	1.15207	2.52551	2.20811	2.37808	3.69428	1.76307	20.722	30.0536	26.1017	113.932	80.1286	72.9146	56169.7	57424.3	56443.6
SSTP_0000851600.1	0.497657	11655.4	Cystein-rich secretory proteins			yes		0	1.23355	1.18697	0.795639	0	0	0	1.26276	0	1.78803	0.88169	0.881536	0	0	0	1.28129	1.61745	4.50553	49154.9	45983.9	44715.1
SSTP_0000851700.1	1.10986	2591.88	Cystein-rich secretory proteins			yes		2.48363	0	1.36501	0.795639	0.880216	0	1.15207	0	3.31217	1.19798	3.04183	1.76307	0	0	0	141.352	134.281	131.111	10879.2	9313.91	10496.8
SSTP_0000851800.1	0.38866	10392.9	Cystein-rich secretory proteins			yes		1.24181	0	0	0	0	0	1.15207	0	1.10406	0	1.76338	0.881536	0	0	0	15.3755	25.8792	31.5387	43399.9	41340.6	39899
SSTP_0000851900.1	0.831365	12379.3	Cystein-rich secretory proteins			yes		1.24181	1.23355	1.18697	0.795639	0.880216	0.881343	0	1.26276	0	3.57605	2.08079	5.28922	0	0	0.79096	100.914	125.256	97.8602	51265.2	47028.5	49921.6
SSTP_0000852000.1	2.82908	14624.2	Cystein-rich secretory proteins			yes		1.24181	2.4671	1.18697	1.59128	0.880216	1.76269	5.76037	5.05103	5.52028	6.25809	9.69859	3.52614	0	0	0.79096	116.597	106.752	97.6199	58799.5	61204.2	55145.4
SSTP_0000852300.1	3.78987	11816.4	Cystein-rich secretory proteins			yes		7.45088	1.23355	4.74787	1.59128	0.880216	1.76269	4.6083	6.31379	5.52028	1.78803	2.64507	0	4.50478	6.8694	7.11864	1347.92	2246.24	1608.48	46369.6	47362.4	42838.7
SSTP_0000852400.1	2.17511	66178.8	Cystein-rich secretory proteins	yes		yes		0	0	2.37393	0.795639	1.76043	4.40672	3.45622	1.26276	5.52028	0.894014	3.52676	0.881536	4.50478	35.2057	223.051	120262	352614	312600	3000.82	2875.98	2524.41
SSTP_0000852500.1	1.61579	34594.5	Cystein-rich secretory proteins	yes		yes		1.24181	2.4671	2.37393	0	0	0	2.30415	5.05103	1.10406	0.894014	1.76338	0	5.40573	20.6082	141.582	47778	218695	147675	256.584	305.816	253.314
SSTP_0001127300.1	15.4505	9834.07	Cystein-rich secretory proteins	yes		yes		1.24181	1.23355	0	3.18256	1.76043	0.881343	42.0968	37.8827	50.7755	3.57605	9.69859	4.40768	1.80191	4.29338	34.0113	7924.65	27721.8	19531.4	21030	20392.4	21350.7
SSTP_0000638200.1	382.81	0.560391	Glycosyl hydrolase family 56 signature / Hyaluronidase					1040.12	880.691	1181.23	2.38692	0	1.76269	252.293	20.5577	66.2434	0.894014	0.88169	1.76307	0.900956	0	0	0	0	0	2.28497	0	0
SSTP_0000941600.1	4337.14	34.5446	Glycosyl transferase				yes	13123.5	13319.8	12336.1	27.8474	10.5626	22.9149	70.2765	58.0868	65.1393	8.94014	8.8169	5.28922	23.4249	28.3363	22.1469	17.9381	25.8792	34.5424	92.6132	54.4939	92.1142
SSTP_0000120600.1	39.5584	11752.3	Hsp20/alpha crystallin family					21.1108	29.6051	34.422	93.8854	66.0162	45.8299	14.977	30.3062	19.873	9.83415	13.2253	16.7492	129.738	133.095	170.847	36324.6	50278.5	36807.2	5508.97	5545.36	6089.07
SSTP_0000990200.1	174.924	1.32041	Lipase					497.967	546.462	522.265	2.38692	1.76043	0	0	1.26276	2.20811	0	0.88169	0	0.900956	0	0	0	0	1.50184	6.073	5.69339	0.794088
SSTP_0000537800.1	321.153	2.91873	Lipase			yes		994.692	1006.57	873.607	3.18256	7.92195	0.881343	1.15207	1.26276	1.10406	0	1.76338	0.881536	1.80191	0.858675	0	0	0	0	13.6642	7.32007	8.73497
SSTP_0000164100.1	2.89481	3430.48	Nematode fatty-acid retinoid binding family			yes		2.48363	1.23355	3.5609	3.9782	0.880216	0	4.6083	3.78827	5.52028	1.78803	0.88169	1.76307	5.40573	2.57603	3.9548	703.428	841.076	1375.69	12656.9	13196.5	12375.9
SSTP_0000528200.1	10748.6	75.1732	Neprilysin metalloprotease (M13) family signature				yes	34527.4	29399.1	32788.8	0.795639	1.76043	1.76269	10.3687	1.26276	6.62434	3.57605	10.5803	5.28922	0.900956	0	1.58192	201.163	286.289	250.808	44.0292	41.4804	56.3803
SSTP_0000527900.2	518.223	1.63055	Neprilysin metalloprotease (M13) family signature			yes	yes	1818.01	1540.7	1289.05	0.795639	3.52087	0	2.30415	6.31379	3.31217	6.25809	2.64507	4.40768	0	0.858675	0	3.84387	0	0	0.759125	0	0.794088
SSTP_0000528400.1	887.254	1.88589	Neprilysin metalloprotease (M13) family signature			yes	yes	2784.14	2589.22	2603.02	0	0.880216	0	3.45622	1.26276	3.31217	4.47007	3.52676	1.76307	0	0	0	2.56258	1.61745	1.50184	0.759125	3.25337	3.17635
SSTP_0000493100.1	3740.05	28.932	Neprilysin metalloprotease (M13) family signature		yes	yes		11532.7	11616.3	10485.7	0	2.64065	4.40672	6.91244	6.31379	5.52028	1.78803	0	0.881536	0.900956	0	0	0	1.61745	0	172.321	56.1206	113.555
SSTP_0000557800.1	2650.47	23.1064	not found				yes	8046.95	7710.91	7712.91	70.8119	91.5425	51.1179	50.6913	35.3572	83.9083	54.5348	48.4929	50.2475	20.722	16.3148	11.0734	0	0	1.50184	19.7372	27.6536	26.999
SSTP_0000001475.1	83.2113	0.273341	not found					289.342	259.045	199.41	0	0	0	0	0	1.10406	0	0	0	0.900956	0	0.79096	0	0	0	0	0	1.58818
SSTP_0000110100.1	2.02743	1392.31	not found					0	0	1.18697	0	1.76043	1.76269	6.91244	0	6.62434	3.57605	5.29014	8.81536	1.80191	0.858675	1.58192	1510.64	6159.26	5731.04	1120.47	992.277	1172.07
SSTP_0000216700.1	21.0967	4062.17	not found					11.1763	13.569	9.49573	7.16075	24.6461	19.3896	41.4747	35.3572	27.6014	177.909	171.048	133.993	41.444	30.0536	35.5932	13501	14414.7	12089.8	2821.67	2636.85	2691.96
SSTP_0000244700.1	470.541	2.40116	not found					1479	1286.59	1457.59	1.59128	0	0	0	1.26276	8.83245	5.36408	7.93521	9.6969	0.900956	1.71735	1.58192	0	1.61745	0	0	0	0
SSTP_0000254700.1	5660.43	57.0135	not found					16759.5	17993.7	16188.2	0	0	0	0	2.52551	0	0.894014	1.76338	2.64461	1.80191	1.71735	0	3.84387	0	1.50184	337.81	111.428	220.757
SSTP_0000254900.1	619.555	7.68287	not found					1867.69	1919.4	1782.98	0	0	0	2.30415	2.52551	1.10406	0.894014	0	1.76307	3.60382	2.57603	3.9548	1.28129	1.61745	6.00738	42.511	8.13342	19.8522
SSTP_0000255200.1	13286.4	87.7335	not found					40331.6	41474.3	37722.8	1.59128	0.880216	0	19.5853	13.8903	13.2487	1.78803	4.40845	6.17075	39.6421	30.0536	25.3107	16.6568	25.8792	45.0553	355.27	230.989	271.578
SSTP_0000255300.1	7808.89	3.60382	not found					23443.1	24657.4	22166.6	0	2.64065	0.881343	4.6083	2.52551	2.20811	0	0.88169	0.881536	2.70287	0	0	0	6.46981	0	24.292	3.25337	4.76453
SSTP_0000300500.1	5.38264	69592.6	not found					1.24181	3.68831	1.18697	1.59128	10.5186	10.5761	9.22811	3.78827	6.62434	2.68204	0	0	13.3432	47.5277	198.262	214853	342195	276143	470.627	749.608	438.726
SSTP_0000378100.1	5.25051	1348.84	not found					11.1763	8.63483	8.30876	0	0.880216	0.881343	8.06452	3.78827	5.52028	0.894014	1.76338	0	1.80191	0	7.11864	3080.22	6840.21	6088.48	52.3796	50.4272	62.733
SSTP_0000381100.1	1522.26	2.13463	not found					4550	4757.79	4376.35	2.38692	0.880216	0	6.91244	3.78827	2.20811	5.36408	7.05352	6.17075	0	0.858675	2.37288	0	0	0	3.79562	0	0
SSTP_0000385200.1	839.998	9.40815	not found					2549.44	2601.55	2404.79	0	0	0.881343	0	0	3.31217	0.894014	0	0.881536	0	0	0	6.40645	4.85236	6.00738	54.657	12.2001	26.999
SSTP_0000467500.1	329.896	0.490357	not found					1148.68	870.885	947.199	0	0	0	2.30415	0	0	0	0	0	0	0	0	5.12516	0	0	0.759125	0	0
SSTP_0000467600.1	1370.76	2.61145	not found					4480.92	3805.49	4041.45	0	0	0.881343	4.6083	1.26276	2.20811	8.04612	0.88169	0	0	0.858675	0	19.2194	0	0	1.51825	0.813342	0
SSTP_0000493000.1	528.197	1.11363	not found					1575.86	1667.76	1497.95	0	0.880216	0.881343	4.6083	2.52551	3.31217	0	1.76338	0	0	0	0	0	0	0	7.59125	1.62668	2.38226
SSTP_0000522600.1	735.844	8.55676	not found					2166.96	2367.18	2065.32	5.56947	4.40108	6.1694	1.15207	2.52551	3.31217	1.78803	2.64507	0.881536	6.30669	7.72808	3.16384	3.84387	1.61745	0	28.8467	25.2136	20.6463
SSTP_0000804000.1	1836.82	3.17433	not found					5538.49	5787.81	5200.1	0.795639	0.880216	0.881343	1.15207	1.26276	0	2.68204	0	0	0	0	0	0	3.23491	0	12.9051	8.94676	10.3231
SSTP_0000838900.1	2389.92	4.97752	not found					7178.92	7523.41	6803.69	0	0	0.881343	0	1.26276	1.10406	1.78803	0.88169	0.881536	1.80191	0	0.79096	0	0	0	30.365	8.13342	15.0877
SSTP_0000844200.1	5.68851	18142.1	not found	yes				6.07247	5.50162	4.59356	0.700162	2.14773	1.13693	12.8571	10.2157	7.97129	1.66287	4.382	5.52723	0	0	1.37627	0	1.61745	5.7821	77694.5	70479.8	69510.9
SSTP_0000933300.1	4202.58	2.08465	not found					12655.3	13617.1	11539.7	0	0	1.76269	3.45622	2.52551	3.31217	0	2.64507	0	1.80191	0	0	7.68774	9.70472	0	0	0	3.17635
SSTP_0000933500.1	1010.16	0.218192	not found					3202.64	3094.97	2792.93	0	0	0.881343	0	0	0	0	0	0	0.900956	1.71735	0	0	0	0	0	0	0
SSTP_0000933700.1	1314.98	0.066174	not found					3946.48	4059.61	3826.78	0	0	0.881343	0	0	1.10406	0	0	0	0	0	0	0	0	0	0	0	0.794088
SSTP_0001018200.1	171.153	0.53951	not found					538.947	504.521	494.965	0.795639	0	0	1.15207	0	0	0	0.88169	0	0.900956	0	0.79096	0	0	0	1.51825	0	2.38226
SSTP_0001020200.1	2.60429	2846.07	not found					0	0	0	0.795639	5.32531	0	3.45622	5.05103	8.81037	0.894014	0.88169	0.881536	0.909965	0.858675	0	26717	4348.91	3081.53	0	0	0.944965
SSTP_0001099400.1	662.186	6.27713	not found					2011.74	2000.81	1922.89	3.18256	6.16151	0.881343	6.91244	3.78827	3.31217	23.2444	18.5155	13.223	1.80191	0.858675	0	5.12516	0	0	5.31387	4.06671	3.17635
SSTP_0001117200.1	20.6901	1687.94	not found					27.3199	24.671	21.3891	26.2561	19.3648	10.5761	14.977	23.9924	17.6649	8.94014	17.6338	7.05229	21.6229	18.0322	22.9378	2055.68	3247.85	3622.21	4076.86	3173.35	3983.09
SSTP_0001226700.1	491.145	3.35856	not found					1517.72	1459.36	1391.52	1.59128	5.2813	4.40672	16.129	8.8393	15.4568	9.87885	5.31659	4.4165	0.900956	0	0.79096	0	0	0	3.79562	4.88005	10.3231
SSTP_0001280700.1	1041.41	1.7346	not found					3337.53	3060.43	2964.02	1.59128	0.880216	0.881343	2.30415	5.05103	0	0.894014	1.76338	0	1.80191	1.71735	4.74576	1.28129	1.61745	1.50184	2.27737	1.62668	1.58818
SSTP_0000244800.1	1939.43	0.689324	not found			yes		6142.01	5816.18	5494.47	0	0	0	0	0	2.20811	0.894014	0.88169	1.76307	0	0	0	0	0	0	1.51825	1.62668	1.58818
SSTP_0000245000.1	3520.13	36.8674	not found			yes		11004.9	10890.5	9701.99	8.75203	7.92195	9.69478	24.1936	17.6786	15.4568	5.36408	7.93521	3.52614	17.1182	15.4562	15.8192	44.8452	33.9665	33.0406	79.7081	92.7209	92.9083
SSTP_0000247300.1	0.327489	1676.42	not found			yes		0	0	1.18697	0	1.76043	0	0	0	0	1.78803	0	0	0	0.858675	1.58192	10792.3	5314.95	4002.42	0	0	3.17635
SSTP_0000254100.1	10711.1	52.4848	not found			yes		32800	33314.4	30173.9	0	2.64065	1.76269	42.6267	20.2041	44.1623	0	3.52676	0.881536	2.70287	0	0.79096	0	0	1.50184	318.073	91.9076	210.433
SSTP_0000254300.1	10947.5	10.4835	not found			yes		33017.3	34058.2	31440.4	3.9782	0.880216	1.76269	0	1.26276	3.31217	0.894014	0.88169	0.881536	3.60382	2.57603	3.9548	0	3.23491	6.00738	61.4891	8.13342	34.1458
SSTP_0000254600.1	6496.35	32.7337	not found			yes		19915	20104.4	18447.8	0	0	0	0	0	0	0.894014	0.88169	0	0.900956	0	0	0	1.61745	0	233.051	59.3739	96.0847
SSTP_0000254800.1	10469.6	68.9087	not found			yes		32016.3	32319.7	29878.8	0	0	0	4.6083	1.26276	5.52028	0.894014	0	0.881536	0	0	0	0	0	0	450.92	142.335	231.874
SSTP_0000255000.1	4837.78	6.67851	not found			yes		14426.8	15355.9	13753.9	0	0	0	0	1.26276	2.20811	0.894014	0	0	0	1.71735	0	1.28129	9.70472	25.5314	25.8102	4.88005	10.3231
SSTP_0000255100.1	7605.11	70.9926	not found			yes		23146.6	23834.3	21458.2	0	0.880216	0	2.30415	2.52551	1.10406	0	0	0	0	0	0.79096	2.56258	8.08726	7.50922	383.358	174.055	275.549
SSTP_0000274100.1	387.451	0.394426	not found			yes		1274.1	1206.41	1006.55	0	0	0	0	0	0	0	0	0	0	0	0	0	0	0	1.51825	1.62668	1.58818
SSTP_0000274200.1	109.809	0.126521	not found			yes		336.531	317.022	334.725	0	0	0	0	0	0	0	0	0	0	0	0	0	0	0	1.51825	0	0
SSTP_0000274300.1	474.835	0.197213	not found		yes	yes		1449.2	1491.36	1330.59	0	0	0	0	1.26276	1.10406	0	0	0	0	0	0	0	0	0	0.759125	0.813342	0.794088
SSTP_0000380800.1	2483.34	5.51012	not found			yes		7491.86	7857.7	6990.05	2.38692	0.880216	2.64403	3.45622	0	1.10406	8.94014	20.2789	9.6969	6.30669	0	1.58192	11.5316	0	0	3.79562	0.813342	3.17635
SSTP_0000390500.1	451.552	0.494023	not found		yes	yes		1343.64	1491.36	1220.2	0.795639	0	1.76269	1.15207	5.05103	0	0	3.52676	0	0	0	0	0	0	0	0	0.813342	1.58818
SSTP_0000443900.1	154.882	0.777475	not found			yes		0	0	0	0	0	1.76269	573.261	234.254	584.664	0.894014	6.58622	0	0	0	0.39548	0.640645	0	0	0	0.813342	0
SSTP_0000444500.1	1548.56	1.84784	not found			yes		4608.37	4944.06	4384.65	0	0	0	0	0	0	0.894014	0.88169	0	0	0	0	2.56258	0	0	11.3869	4.06671	2.38226
SSTP_0000456500.1	1.52928	2480.86	not found			yes		0	1.23355	0	0.795639	2.64065	3.52537	1.15207	0	4.41623	0.894014	1.76338	1.76307	4.50478	3.4347	11.0734	11069.1	10280.5	8387.8	2.27737	4.06671	3.17635
SSTP_0000481200.1	356.061	2.08097	not found			yes		0	0	0	0	0	0	1278.51	762.617	1163.42	0	8.8169	3.52614	0	0	0	3.84387	6.43746	0	0.759125	0	1.58818
SSTP_0000481300.1	0.845633	4726.42	not found		yes	yes		0	0	0	0.795639	0	0.881343	2.30415	2.52551	1.10406	0.894014	0.88169	0	0.900956	2.57603	18.1921	11232.2	35119.9	10341.1	0	0.406671	0
SSTP_0000481700.1	0.730418	1114.73	not found		yes	yes		0	0	0	0.795639	2.64065	0.881343	1.15207	0	1.10406	0	0	0	0.900956	1.71735	0	4236.86	7005.04	2125.74	4.55475	0.406671	1.58818
SSTP_0000482933.1	7982.28	3.32471	not found		yes	yes		24241.6	24989.4	22582.5	1.32872	0	1.76269	10.2995	1.26276	12.3654	12.0692	9.40763	7.01703	2.47763	0	1.9774	1.53755	0	1.50184	1.86745	0	2.04081
SSTP_0000482966.1	2877.44	7.12644	not found	yes	yes	yes		8415.59	10487.5	6967.03	2.64948	5.2813	1.76269	11.5899	2.52551	3.09136	12.0692	11.7529	7.96908	7.43289	5.15205	5.9322	6.15019	4.85236	1.50184	10.2785	7.32007	5.10599
SSTP_0000508300.1	4704.97	4.24307	not found			yes		14541.6	14328.9	13466.1	0	3.52087	0.881343	1.15207	2.52551	0	16.9863	14.107	16.7492	0	0	0	0	0	1.50184	0.759125	0.813342	0
SSTP_0000508400.1	3248.79	1.02327	not found			yes		9949.41	10248.8	9039.02	0.795639	0	0	0	0	1.10406	0.894014	1.76338	1.76307	0	0	0	0	0	0	3.0365	2.44002	2.38226
SSTP_0000609100.1	15.201	3870.06	not found			yes		13.6599	23.4374	16.6175	9.54767	16.7241	25.559	8.06452	17.6786	5.52028	8.04612	7.93521	0.881536	5.40573	1.71735	6.32768	3194.26	19360.9	23717.1	60.73	47.1738	30.1754
SSTP_0000635600.1	4.82736	7506.16	not found			yes		6.20906	14.8026	20.1784	0	0	0	1.15207	0	1.10406	5.36408	2.64507	1.76307	0	0	0	11.5316	14.5571	33.0406	29150.4	29037.9	31816.7
SSTP_0000668000.1	154.057	1.24207	not found			yes		0	0	0	0.39782	0	0	596.221	329.239	460.656	0	0	0.440768	0	0	0	0	2.24826	8.35026	2.27737	0	1.58818
SSTP_0000684800.1	1312.43	1.94389	not found			yes		4379.87	4052.2	3373.36	0	3.52087	1.76269	1.15207	0	0	0	0.88169	0	3.60382	2.57603	0.79096	1.28129	1.61745	1.50184	3.0365	4.06671	3.97044
SSTP_0000684900.1	1265.48	0.786253	not found			yes		3765.18	4063.31	3558.53	0	0	0	2.30415	0	0	0	0	0	0.900956	0	3.16384	0	0	3.00369	0.759125	0.813342	0.794088
SSTP_0000704800.1	554.562	0.994661	not found			yes		1629.26	1777.54	1582.23	0	0.880216	0	1.15207	0	0	0	0	0.881536	0	0	0	0	0	0	3.0365	3.25337	4.76453
SSTP_0000804100.1	1945.14	0.737409	not found			yes		6067.5	5944.47	5481.41	0.795639	2.64065	0	2.30415	3.78827	3.31217	0	0.88169	0	0	0	0	0	0	0	1.51825	4.06671	2.38226
SSTP_0000804200.1	1753.6	0.466848	not found			yes		5424.24	5555.9	4800.09	0	0	0	0	0	2.20811	0.894014	0	0	0	0	0	0	1.61745	0	2.27737	0.813342	0
SSTP_0000804300.1	2260.44	3.30941	not found			yes		6868.47	7238.46	6192.4	3.9782	5.2813	1.76269	16.129	7.57654	9.93651	0.894014	3.52676	1.76307	0.900956	0	0	2.56258	11.3222	4.50553	4.55475	6.50673	3.17635
SSTP_0000804400.1	905.273	2.13905	not found			yes		2888.46	2829.76	2427.35	0.795639	0	0	0	0	1.10406	1.78803	3.52676	3.52614	4.50478	5.15205	0.79096	0	3.23491	0	1.51825	1.62668	0
SSTP_0000933000.1	4665.09	39.4891	not found			yes		14159.2	14954.3	12853.7	5.56947	2.64065	3.52537	3.45622	1.26276	2.20811	3.57605	7.05352	4.40768	0.900956	6.8694	1.58192	3.84387	11.3222	16.5203	110.832	152.908	154.053
SSTP_0000933100.1	2316.55	0.0677785	not found			yes		6910.69	7128.67	6809.63	0	0	0	0	0	0	0	0	0	0	0	0	0	0	0	0	0.813342	0
SSTP_0000933600.1	4674.83	2.54093	not found			yes		14143	14771.7	13154	0	0	0	1.15207	2.52551	1.10406	0	1.76338	0.881536	9.00956	0.858675	1.58192	10.2503	0	1.50184	3.0365	0.813342	0.794088
SSTP_0000943900.1	36.524	0	not found			yes		104.312	108.552	112.762	0	0	0.881343	0	0	2.20811	0	0	0	0	0	0	0	0	0	0	0	0
SSTP_0000947700.1	22.7906	20840	not found			yes		69.5415	64.1445	61.7223	0.795639	0	1.76269	1.15207	3.78827	2.20811	3.57605	5.29014	6.17075	0	0.858675	6.32768	2278.13	6520.21	5014.66	81071.7	73713.4	81460.1
SSTP_0000947800.1	4.44155	34698.3	not found			yes		7.45088	7.40129	7.1218	2.38692	0.880216	2.64403	2.30415	7.57654	2.20811	4.47007	6.17183	6.17075	0.900956	1.71735	1.58192	658.583	2079.79	1007.74	140182	135083	137348
SSTP_0000956600.1	134.526	0.481705	not found			yes		507.902	357.729	340.659	0	0.880216	0	2.30415	1.26276	0	0	0.88169	1.76307	0	0	0	0	1.61745	0	1.51825	0	0
SSTP_0001052700.1	6736.24	9.13325	not found			yes		20540.8	20817.3	19263.3	0	0	0	0	2.52551	2.20811	41.1246	36.1493	27.3276	0.900956	1.71735	0.79096	0	0	0	0	0	1.58818
SSTP_0001099800.1	230.752	0.78654	not found			yes		0	1.23355	1.18697	0	0	0	851.855	389.548	832.944	0	7.52082	0.881536	0	0	0.39548	0.640645	0	0	0	0	0
SSTP_0000528000.1	8297.32	86.878	Peptidase			yes	yes	25631	22735.5	26284.2	0	1.76043	2.64403	10.3687	3.78827	6.62434	249.43	338.569	318.234	0	0.858675	2.37288	16.6568	48.5236	46.5572	6.073	7.32007	7.94088
SSTP_0000257700.4	12078.6	142.636	Phosphorylase					36689.4	35637.2	36005.4	65.2424	76.5788	72.2702	67.9724	46.722	46.3704	84.9313	135.78	100.495	54.9583	48.9445	57.7401	115.316	19.4094	106.631	357.548	309.07	320.812
SSTP_0000254200.1	4666.05	1.578	Prokaryotic membrane lipoprotein lipid attachment site profile.			yes		14693.1	14210.5	13076.8	1.59128	0.880216	0	5.76037	2.52551	3.31217	1.78803	0.88169	0	0	0	0	1.28129	4.85236	0	4.55475	0.813342	4.76453
SSTP_0000670700.1	6584.55	32.5819	prolyl endopeptidase				yes	19902.5	20282	19036.6	4.77383	3.52087	2.64403	9.21659	7.57654	12.1446	11.6222	11.462	13.223	1.80191	0.858675	0.79096	0	0	1.50184	191.299	50.4272	107.996
SSTP_0001108800.1	9579.66	47.0024	prolyl endopeptidase				yes	30126.9	28145.5	27207	13.5259	23.7658	19.3896	273.191	229.822	177.753	42.9126	51.138	55.5368	109.917	78.9981	26.8926	52.5329	35.584	7.50922	26.6073	40.6671	35.734
SSTP_0000289100.1	29355.3	103.888	Prolyl endopeptidase	yes		yes	yes	88380.5	90864.7	84892.6	4.77383	6.16151	6.1694	16.129	11.3648	15.4568	1.78803	6.17183	7.05229	22.5239	5.15205	4.74576	8.96903	4.85236	3.00369	603.474	187.703	391.223
SSTP_0001019400.1	14056.1	102.492	Prolyl endopeptidase			yes	yes	43590.1	42610.4	40073.2	27.0517	28.1669	31.7284	44.9309	51.773	47.4744	19.6683	20.2789	26.4461	41.444	44.6511	44.2937	175.537	163.363	204.251	194.336	143.961	151.671
SSTP_0001108500.1	4669.94	26.6813	prolyl endopeptidase			yes	yes	14239.8	14273.5	13394.5	5.56947	4.40108	5.28806	42.477	34.0944	29.8095	10.7282	10.5803	11.46	0.900956	1.71735	0.79096	5.12516	1.61745	0	107.211	60.9925	109.052
SSTP_0000302800.1	503.789	3.62227	Proteasome complex subunit Rpn13 ubiquitin receptor					1549.78	1408.71	1532.37	3.18256	4.40108	4.40672	11.5207	7.57654	12.1446	2.68204	14.9887	7.93382	3.60382	1.71735	0.79096	3.84387	1.61745	1.50184	0.759125	2.44002	1.58818
SSTP_0000507200.1	695.378	3.89694	Proteasome complex subunit Rpn13 ubiquitin receptor					2011.74	2094.56	2135.35	0.795639	0.880216	3.52537	4.6083	2.52551	4.41623	12.5162	8.8169	9.6969	2.70287	3.4347	0.79096	2.56258	1.61745	0	3.0365	0	1.58818
SSTP_0000507300.1	662.302	3.3133	Rhodanese/ phosphatase family	yes	yes			1953.37	1986.01	1959.68	10.3433	10.5626	6.1694	8.06452	17.6786	8.83245	6.25809	8.8169	7.05229	0.900956	2.57603	0.79096	3.84387	3.23491	1.50184	0	0.813342	3.97044
SSTP_0000089400.1	1145.17	3.79392	saposin			yes		3803.67	3694.48	2792.93	0.795639	0.880216	4.40672	1.15207	3.78827	4.41623	4.47007	4.40845	0.881536	0.900956	5.15205	3.9548	6.40645	0	3.00369	8.35037	2.44002	5.55862
SSTP_0000355100.1	4904.85	10.2442	saposin			yes		18525.4	14236.4	11256	36.5994	9.68238	4.40672	13.8249	22.7296	38.642	33.0785	11.462	14.1046	11.7124	8.58675	11.8644	3.84387	6.46981	3.00369	7.59125	4.06671	7.14679
SSTP_0000512900.1	1981.8	4.51732	SCP/TAPS				yes	5930.9	6307.13	5581.12	0.795639	0	0.881343	5.76037	6.31379	3.31217	1.78803	3.52676	1.76307	0	0	0	0	0	0	17.4599	12.2001	17.4699
SSTP_0001008500.1	14.0825	30350.2	SCP/TAPS	yes			yes	14.9018	9.86838	17.8045	6.36511	6.16151	5.28806	28.8019	17.6786	19.873	10.7282	21.1606	14.1046	1.80191	2.57603	26.426	8981.77	11946.3	10420.8	113245	107743	111788
SSTP_0000060800.1	11.8904	82212.4	SCP/TAPS					17.3854	20.9703	22.5524	4.77383	14.9637	11.4575	5.76037	2.52551	6.62434	5.36408	7.93521	10.5784	11.7124	48.0858	261.808	153367	318276	293674	78023.6	64741.2	78122.4
SSTP_0000274800.1	272.459	1.25005	SCP/TAPS					840.707	868.418	741.854	0	0	0	1.15207	0	0	0	0	0	0	0.858675	0.79096	0	0	0	5.31387	4.06671	3.97044
SSTP_0000453600.1	106.575	1.3981	SCP/TAPS					319.618	303.65	316.588	0	2.47341	0.881343	10.3687	2.52551	3.06928	0.894014	1.76338	3.52614	2.70287	0	0.79096	1.78099	0	4.50553	0	0.813342	0
SSTP_0000512600.1	6.89119	3829.29	SCP/TAPS					9.9345	13.569	8.30876	5.56947	0.880216	1.76269	9.21659	5.05103	7.72839	8.04612	14.9887	7.05229	1.80191	5.15205	20.565	6906.15	16499.6	19510.5	1071.12	1002.04	904.466
SSTP_0000770100.1	3258.87	36.4186	SCP/TAPS					9270.13	10331	9585.94	4.77383	7.04173	2.64403	39.1705	32.8317	56.3069	25.0324	28.2141	29.9722	7.20765	6.8694	7.11864	2.56258	0	10.5129	165.489	66.694	87.3497
SSTP_0000986700.1	84.5222	0.494598	SCP/TAPS					250.846	272.614	227.898	0	0	0	4.6083	2.52551	2.20811	0	3.52676	0	0	0	0.79096	0	1.61745	0	0	0	0
SSTP_0000990000.1	501.785	5.99261	SCP/TAPS					1497.63	1511.1	1457.59	2.38692	2.64065	0	20.7373	6.31379	17.6649	6.25809	1.76338	1.76307	1.80191	0	1.58192	5.12516	14.5571	25.5314	2.27737	5.69339	5.55862
SSTP_0001019000.1	599.174	2.41451	SCP/TAPS					1758.41	1967.51	1657.01	0.795639	0.880216	0.881343	3.45622	2.52551	1.10406	5.36408	4.40845	1.76307	5.40573	2.57603	0.79096	0	1.61745	1.50184	1.51825	2.44002	1.58818
SSTP_0001019100.1	665.785	5.39132	SCP/TAPS					2065.14	1976.14	1934.76	3.9782	4.40108	0.881343	3.45622	0	3.31217	0.894014	1.76338	4.40768	3.60382	2.57603	5.53672	12.8129	11.3222	6.00738	5.31387	5.69339	4.76453
SSTP_0000482000.1	2.51163	35456	SCP/TAPS			yes	yes	3.72544	0	2.37393	0	3.52087	7.05075	2.30415	2.52551	1.10406	50.9588	19.3972	42.3137	1.80191	33.4883	97.288	134834	167285	123106	0	0	1.58818
SSTP_0000511800.1	2.02507	295.674	SCP/TAPS			yes	yes	0	2.4671	2.37393	0.795639	0.880216	0	4.6083	3.78827	3.31217	5.36408	1.76338	2.64461	0.900956	1.71735	0	318.977	564.216	559.557	773.844	664.573	654.535
SSTP_0000513400.1	7.02564	76774.2	SCP/TAPS			yes	yes	8.69269	7.40129	9.49573	2.38692	1.76043	8.81343	9.21659	8.8393	6.62434	8.94014	2.64507	3.52614	3.60382	1.71735	3.16384	6.40645	3.23491	1.50184	315312	315308	290637
SSTP_0001008600.1	24.6893	53401.6	SCP/TAPS	yes		yes	yes	2.48363	1.23355	5.93483	3.9782	39.6097	28.203	49.5392	50.3714	40.8501	9.83415	7.93521	7.05229	63.0669	67.8353	271.884	102268	229187	152596	53344	51177.1	51819.4
SSTP_0001008700.1	10.5183	78145.6	SCP/TAPS	yes		yes	yes	6.20906	6.16774	3.5609	3.9782	10.5626	4.40672	23.0415	10.241	26.4974	8.94014	11.462	12.3415	25.2268	57.5312	254.895	91705.1	259168	205050	133927	112620	134907
SSTP_0001008900.1	12.034	24709	SCP/TAPS	yes		yes	yes	14.9018	18.4169	19.0389	7.95639	4.77958	2.41488	11.5207	18.7772	10.4996	16.7985	35.2676	20.2312	8.72125	21.4669	127.811	54540.8	115022	93087	11975.6	10909.4	10742.8
SSTP_0000512000.1	10.0668	9930.75	SCP/TAPS			yes		7.45088	8.63483	9.49573	21.4823	2.64065	12.3388	11.5207	3.78827	13.2487	5.36408	11.462	7.05229	0	0	0.79096	21.7819	32.3491	19.524	33507.8	50861.3	34701.7
SSTP_0000705700.1	3.63803	9925.95	SCP/TAPS			yes		6.5071	2.4671	1.18697	2.26757	6.16151	1.15456	3.41014	1.26276	8.32458	0.894014	0	0	2.28843	6.01073	15.8192	38334.9	44974.9	35709.4	15.5317	32.6719	19.0581
SSTP_0001053000.1	515.415	1.01218	SCP/TAPS			yes		1642.78	1502.79	1485.7	0.795639	0	0	2.30415	1.26276	3.09136	1.34102	1.76338	0.440768	1.15322	0.918782	0	0	1.61745	0	0.759125	0.97601	3.17635
SSTP_0001147900.1	75.5388	0.14503	SCP/TAPS			yes		246.872	219.571	210.093	0	0	0	0	0	3.31217	0	0.88169	0	0	0.858675	0	0	0	0	0	0	0
SSTP_0000012400.1	363.727	1.01472	sulphotransferase					1.24181	3.70064	1.18697	0.795639	0	1.76269	1761.44	272.756	1230.66	0	0	0.881536	4.50478	0.858675	0.79096	2.72915	1.61745	0	0	0	0.794088
SSTP_0000012500.1	151.641	1.33565	sulphotransferase					0	1.23355	1.18697	0.795639	0	1.76269	695.853	108.597	555.34	5.36408	0	0.881536	0	0	0	7.52117	0	1.50184	0.759125	0	0
SSTP_0000110200.1	4.34999	1251.29	TIMP			yes		7.45088	7.40129	7.1218	5.56947	3.52087	3.52537	3.45622	0	1.10406	0.894014	0	0	5.40573	6.01073	3.16384	85.8464	27.4967	108.133	4645.84	5102.9	5029.75
SSTP_0000220800.1	1780.44	13.2096	TIMP			yes		5432.93	5565.77	4999.5	0	4.40108	1.76269	8.06452	3.78827	7.72839	3.57605	2.64507	3.52614	0.900956	0.858675	2.37288	49.9703	11.3222	9.01107	31.1241	13.8268	29.3813
SSTP_0001235100.1	0	62.5053	Transposase, type 1					0	0	0	0	0	0	0	0	0	0	0	0	0	0	0	0	0	0	280.049	277.837	192.177
SSTP_0000700800.1	2698.55	0.188442	Transthyretin-like	yes				8661.65	6967.69	8657.14	0	0.440108	0	0	0	0	0.447007	0	0	0	0	0	0.640645	0	0	0.379562	0	0.794088
SSTP_0000700900.1	3285.25	0.0329567	Transthyretin-like	yes				10749.1	8502.84	10314.1	0	0	0	1.15207	0	0	0	0	0	0	0	0.39548	0	0	0	0	0	0
SSTP_0000701300.1	3285.25	0.0329567	Transthyretin-like		yes			10749.1	8502.84	10314.1	0	0	0	1.15207	0	0	0	0	0	0	0	0.39548	0	0	0	0	0	0
SSTP_0000701400.1	2698.55	0.188442	Transthyretin-like	yes	yes			8661.65	6967.69	8657.14	0	0.440108	0	0	0	0	0.447007	0	0	0	0	0	0.640645	0	0	0.379562	0	0.794088
SSTP_0001043200.1	458.92	4.25098	Transthyretin-like					1440.5	1453.12	1229.7	2.38692	0	0	0	1.26276	3.31217	0	0.88169	0	0	0	0	0	1.61745	6.00738	14.4234	12.2001	15.8818
SSTP_0001222100.1	2921.64	6.03923	Transthyretin-like					8672.82	9342.89	8277.9	0	0	0	0	0	1.10406	0	0	0	0	0	0	0	1.61745	0	36.438	11.3868	23.0286
SSTP_0000485800.1	4480.24	1.83257	Transthyretin-like			yes		13691	13947.7	12679.2	0	0	0.881343	1.15207	0	2.20811	0	0.88169	0	0	0	0	3.84387	9.70472	6.00738	0.759125	0	0.794088
SSTP_0000648300.1	358.757	4.17605	Transthyretin-like			yes		1039.4	1090.46	1086.07	0.795639	2.64065	0.881343	1.15207	6.31379	1.10406	0.894014	0	0.881536	2.70287	0.858675	0	0	0	0	15.1825	8.94676	20.6463
SSTP_0001108300.1	358.661	1.78815	Transthyretin-like			yes		1164.82	1127.46	930.582	0.795639	0	0.881343	2.30415	0	1.10406	0	1.76338	0	0	0	0	0	0	1.50184	5.31387	7.32007	5.55862
SSTP_0001133200.1	5068.23	1.49976	Transthyretin-like			yes		15274.3	15815.3	14520.2	0.795639	0	0	1.15207	1.26276	1.10406	0	0.88169	0	0	0	0	1.28129	9.70472	3.00369	1.51825	0.813342	0.794088
SSTP_0001221600.1	868.259	7.55385	Transthyretin-like			yes		2580.49	2745.88	2394.11	6.36511	15.8439	11.4575	20.7373	23.9924	15.4568	6.25809	6.17183	3.52614	15.3162	20.6082	18.983	2.56258	0	0	8.35037	5.69339	3.17635
SSTP_0001222000.1	1004.02	7.91181	Transthyretin-like	yes		yes		3030.02	3167.75	2803.61	8.75203	0.880216	5.28806	6.91244	6.31379	6.62434	8.94014	6.17183	5.28922	2.70287	2.57603	2.37288	0	3.23491	0	33.4015	3.25337	26.999
SSTP_0001222200.1	638.974	3.34922	Transthyretin-like			yes		1890.04	2000.81	1854.04	0.795639	1.76043	0	0	0	3.31217	0	0.88169	0	0	0	0	20.5006	0	0	8.35037	5.69339	4.76453
SSTP_0001222300.1	1520.39	3.29602	Transthyretin-like			yes		4686.6	4680.08	4313.44	0	0.880216	0	0	2.52551	0	0	0	0	0	0	0	0	3.23491	3.00369	8.35037	14.6401	10.3231
SSTP_0000667900.1	8070.16	22.4632	Trypsin Inhibitor like cysteine rich domain			yes	yes	24837.9	24664.5	23056.5	1.59128	1.76043	0.881343	28.8019	8.8393	30.6596	40.2306	44.8339	72.2948	0.900956	0	0	1.28129	9.70472	9.01107	30.1221	30.6223	30.5565
SSTP_0000564400.1	4.02871	7310.11	Tyrosinase copper-binding domain					3.72544	4.93419	5.93483	3.18256	1.76043	1.76269	6.91244	2.52551	5.52028	2.68204	2.64507	5.28922	0	0	0.79096	6493.58	38734.8	42057.7	123.737	135.828	164.376
SSTP_0001115700.1	2612.16	21.6018	UGT; glucuronosyltransferase					7423.56	7862.63	8127.16	6.36511	7.04173	3.52537	13.8249	18.9414	46.3704	44.7007	43.2028	23.8015	13.5143	4.29338	3.16384	1.28129	1.61745	0	40.2336	34.9737	48.4394
