# Supplementary material for: A comparative ‘omics’ approach for prediction of candidate Strongyloides stercoralis diagnostic coproantigens
Source: PLoS Negl Trop Dis. 2023 Apr 17;17(4):e0010777. doi: 10.1371/journal.pntd.0010777 (PMC10138266; doi:10.1371/journal.pntd.0010777)
Supplement: S5 File — ES: Orthologues of S. ratti E/S proteome. DE: Differentially expressed proteins between gut-dwelling and non-gut-dwelling life stages. (XLSX) [file pntd.0010777.s005.xlsx]

## Sheet: Summary_epitope_numbers
Dataset	Number of	Total epitopes predicted (epitopes predicted only by this tool)			Total
		BepiPred	Bcepred	Both tools	(origin of total)
DE proteins	Proteins containing epitopes	78 (42)	62 (26)	36	104
(n = 328)					(42+26+36)
	Epitopes	125 (98)	108 (81)	56a	233
					(125 + 108)
E/S orthologues	Proteins containing epitopes	320 (280)	44 (4)	40	324
(n = 1,057)					(280+4+40)
	Epitopes	747 (728)	62 (59)	49a	787
					(728 + 59)
a Overlapping sequences but not necessarily identical lengths.

## Sheet: ES_BepiPred
S. stercoralis orthologues of S. ratti E/S proteome predicted to contain epitopes by BepiPred	Epitope length (aa)	Start position in protein	End position in protein	Average score (threshold 1.3)	Predicted epitope sequence
SSTP_0000001900.1	10	519	528	1.6333	KHDKDWPPYR
SSTP_0000013400.1	10	661	670	1.5703	TEKGETVEGS
SSTP_0000013400.1	32	687	718	1.81319	SETVKDTQEGGEEKMDEDKKETSNDNETPKAH
SSTP_0000020900.1	25	218	242	1.74808	KEVSDDEDDTKKEGDVEDVKDDEKK
SSTP_0000025500.1	11	469	479	1.82718	AQIESPGYPNP
SSTP_0000030100.1	10	57	66	1.6538	KAGDKRPHGG
SSTP_0000030100.1	12	118	129	1.909	DGGTKNDEEEKA
SSTP_0000030100.1	18	210	227	1.92	REGDTQREEDNDNDNNWE
SSTP_0000032200.1	23	37	59	1.81026	KNEPSKSEKIPTTSTTPHNPSNN
SSTP_0000033400.1	10	52	61	2.2063	DTGPDPDDTL
SSTP_0000034000.1	11	123	133	1.67909	PTATDWPKQQD
SSTP_0000034000.1	10	1073	1082	1.8661	GSGESGSQDN
SSTP_0000034700.1	13	41	53	1.66392	SNVGSSSSNTGSS
SSTP_0000034700.1	9	104	112	1.51233	PGTVQNNST
SSTP_0000034700.1	9	927	935	1.90256	KNNPNDPEA
SSTP_0000036400.1	9	733	741	1.60967	NEPTGSGEI
SSTP_0000036400.1	10	1362	1371	1.6687	VDPGCTDPGI
SSTP_0000036400.1	13	1417	1429	1.57323	TKDIENDKKNKDG
SSTP_0000037000.1	26	689	714	1.68185	KKKAEEEKNEKEKKTEGEKDSESKIT
SSTP_0000037700.1	11	170	180	1.63	TNSTSTTTKQQ
SSTP_0000037700.1	14	1098	1111	1.83064	YDTSPENEDVNNKK
SSTP_0000038600.1	9	43	51	1.63256	TQKPGDGVN
SSTP_0000039700.1	19	309	327	1.93768	SRPVTPPRNNTPNGKKTKK
SSTP_0000040200.1	10	126	135	1.8776	TNPNYKPPSD
SSTP_0000040200.1	11	442	452	1.51345	KYPMDPEKYDG
SSTP_0000040200.1	9	476	484	2.07756	SSPPPKHQK
SSTP_0000040200.1	9	547	555	1.99811	TTNDPPTGY
SSTP_0000040200.1	20	600	619	1.67025	DKSEKEDKKETKKKDKKAEE
SSTP_0000041300.1	14	356	369	2.13343	TRKTKPSPPPIPQQ
SSTP_0000041300.1	10	403	412	1.8679	KPIKPPTPIP
SSTP_0000041300.1	11	579	589	1.56136	YSSQTSSYPTK
SSTP_0000048800.1	13	48	60	2.01831	TSGNGGPPHSYGQ
SSTP_0000050700.1	9	408	416	1.78089	SPPGGDFAD
SSTP_0000054200.1	11	264	274	1.51436	GVDTEESYPYK
SSTP_0000057000.1	10	144	153	1.5927	EQDSSESSLP
SSTP_0000057000.1	11	685	695	1.60373	SSSNNRQPNIS
SSTP_0000057600.1	10	37	46	1.6961	KGHLDPGEDE
SSTP_0000057700.1	14	43	56	2.03314	RTKENRAPSPPKDA
SSTP_0000057700.1	18	161	178	2.28811	QSSDDNPPPIPTTSPPHE
SSTP_0000057700.1	10	399	408	1.8584	PNGDSENDSF
SSTP_0000057700.1	9	484	492	2.037	SNDANGDSP
SSTP_0000064700.1	9	572	580	2.00189	SPSPSPIQE
SSTP_0000064700.1	18	938	955	1.95889	DTADAPPAAAPAPTSSLP
SSTP_0000085800.1	12	58	69	1.78617	CGQPGKRSGEST
SSTP_0000087300.1	10	579	588	1.4386	GWTAEYGDPE
SSTP_0000095200.1	13	252	264	1.55946	PDSNIDQYDESPR
SSTP_0000108300.1	9	58	66	1.46922	NSVDSNSNY
SSTP_0000108300.1	10	84	93	1.6545	YHPKKKEDKG
SSTP_0000121100.1	10	29	38	1.9401	DEQKPKGPKV
SSTP_0000126200.1	10	631	640	1.6966	EKSNNNQSPM
SSTP_0000126700.1	19	247	265	1.87111	LTPPEEIYDPNDKKPSDWD
SSTP_0000126700.1	13	275	287	1.86085	ATKPEDWDESQPE
SSTP_0000126700.1	15	308	322	1.8934	IPNPESEKPKDWDDE
SSTP_0000126700.1	15	546	560	2.01987	QGGENQDEDDSQKEE
SSTP_0000126700.1	22	508	529	1.85677	EREKDDGDDNKDEEQLSGSSEE
SSTP_0000126700.1	9	570	578	1.54178	DVATESPKE
SSTP_0000127200.1	11	17	27	1.99436	LDSDDDEDNNE
SSTP_0000127200.1	16	34	49	1.74388	SDHSDSENDNEKNHMD
SSTP_0000127500.1	11	102	112	2.09482	GTKTKTPGPGA
SSTP_0000130100.2	9	130	138	1.63989	MNPDEEDME
SSTP_0000133100.4	10	294	303	2.0908	FHPPQPPEDH
SSTP_0000133100.4	15	635	649	2.00573	STPEPAEYKDSENPP
SSTP_0000133600.1	11	2	12	1.65582	SDKEKTPDNSL
SSTP_0000149500.1	9	15	23	1.775	NGPTPTDIK
SSTP_0000149600.1	14	152	165	1.83671	RNSENPTDTQATTN
SSTP_0000155600.3	10	538	547	1.6807	YDNSSGPYPM
SSTP_0000155600.3	15	750	764	1.51867	EAVSKPQNHGHGHGD
SSTP_0000165200.1	9	74	82	1.66422	QKNKQNDTN
SSTP_0000181400.1	15	3	17	1.84073	DTKGTTKKPSEQESK
SSTP_0000186400.1	12	230	241	2.21817	PDPVRDDPDPGK
SSTP_0000188700.1	10	341	350	1.869	NEDNDKTKET
SSTP_0000202300.1	17	1051	1067	1.84994	PKTTSTHTPSSPDEWQR
SSTP_0000213800.1	13	45	57	1.80677	TGDVGSGDDYDDN
SSTP_0000214900.1	11	96	106	1.948	CPTRPTPPKRC
SSTP_0000214900.1	11	166	176	1.69855	RPTTTQKPQKC
SSTP_0000224400.1	11	407	417	1.81736	SDDDGKRTDGE
SSTP_0000225100.1	9	98	106	1.83822	KNYPDNNHK
SSTP_0000235500.1	10	234	243	1.9245	AAPDDQDGLE
SSTP_0000235700.2	10	284	293	1.8377	TNGDDQDIGA
SSTP_0000241700.1	15	160	174	1.5942	QEGGDNLVPPAPPLP
SSTP_0000241700.1	14	216	229	1.89257	DINIPEPNGNEAAP
SSTP_0000243100.1	9	531	539	1.55722	PGDVSNHDS
SSTP_0000247600.2	9	787	795	1.67989	DIEKKPSND
SSTP_0000247600.2	9	1530	1538	2.063	DHPPTDDAD
SSTP_0000247600.2	9	1780	1788	2.10822	NNDGPGPFS
SSTP_0000247600.2	9	2258	2266	1.98722	QEPPTTESP
SSTP_0000247600.2	9	2453	2461	1.73856	YGEPQSETG
SSTP_0000247600.2	9	3264	3272	1.82767	PDGEPLPTS
SSTP_0000247600.2	9	3299	3307	1.45878	QVLPTDDEG
SSTP_0000247600.2	12	1029	1040	1.97358	NETDSGSQPEPV
SSTP_0000247600.2	12	2519	2530	1.60533	EIPVNDEGKPID
SSTP_0000247600.2	12	3182	3193	1.59783	YPDGTPLEKNED
SSTP_0000247600.2	10	2284	2293	1.8271	ESDKEEEKTR
SSTP_0000247600.2	10	2498	2507	1.7199	SPDGTPLQKN
SSTP_0000247600.2	15	2304	2318	1.73767	TDGDKPSLGEKPKEE
SSTP_0000247600.2	11	3286	3296	1.71336	PTDSSKRPIGP
SSTP_0000247600.2	13	3351	3363	1.59515	VDESGKPIPTSSK
SSTP_0000247700.1	9	3209	3217	1.83156	SDEEEDNVP
SSTP_0000247700.1	9	3348	3356	1.84044	KTEDEGQTT
SSTP_0000248100.1	9	2398	2406	1.664	SIPGDTPKK
SSTP_0000248100.1	12	2919	2930	1.83917	NTHGDNEEDDDY
SSTP_0000249800.1	10	542	551	2.0179	PKETPPPAMG
SSTP_0000255500.1	13	282	294	1.91362	IKDPDAKKPEDWD
SSTP_0000255500.1	43	298	340	1.918	YIDDPEDTKPDDWEKPEHIPDPDAKKPEDWDDEMDGDWEPPMI
SSTP_0000255500.1	32	451	482	1.93766	ADKAESKEEEDEDKADAKDEDEAKEKDEEEGH
SSTP_0000257900.1	9	974	982	1.69522	DNKDQSSST
SSTP_0000264100.1	17	198	214	1.82706	QQESDADKKGEAAKPDE
SSTP_0000264100.1	13	373	385	2.06662	EEQAEPDGTDEAE
SSTP_0000264100.1	11	567	577	2.12236	FEKPKPPKGKQ
SSTP_0000264100.1	14	638	651	1.83393	AKAKEGGGGGKKKG
SSTP_0000264700.1	10	221	230	2.0913	DQPPNSKDSN
SSTP_0000265200.1	13	666	678	1.96831	TNGASPQDPAQWP
SSTP_0000266200.1	9	24	32	1.95389	PQPGPPVVD
SSTP_0000270100.1	11	33	43	1.71336	PTDSSKRPIGP
SSTP_0000270100.1	10	260	269	1.6969	SETGQPLPTD
SSTP_0000270100.1	15	667	681	1.7646	GTPINTDDQGRPLSP
SSTP_0000270100.1	9	1046	1054	1.494	DIPWPTRKP
SSTP_0000270100.1	9	1426	1434	1.978	GTSNDDPLP
SSTP_0000275500.1	17	271	287	1.78365	CDPNPDFPTVPFPNPEE
SSTP_0000275500.1	9	511	519	1.88567	TEQPGNKPK
SSTP_0000286100.1	10	1273	1282	1.4901	ESSPSETVVP
SSTP_0000286300.1	9	1689	1697	2.00533	NKDTPPNVE
SSTP_0000289100.1	27	101	127	1.95644	KPPYCKPPPCKPIPPPTCEPVPPPTCE
SSTP_0000289100.1	33	143	175	2.43024	LKPSKPSKPPKPSTPQKPSTPQKPKTTPKGTTT
SSTP_0000293300.1	11	140	150	1.94255	KSSSGGGSSSG
SSTP_0000293300.1	9	240	248	1.52967	DAENYEGGR
SSTP_0000299100.1	20	358	377	1.76005	NSNNEGNSSTCDDTGNDDTF
SSTP_0000299100.1	12	2123	2134	1.91017	KLDSSAPPGSTD
SSTP_0000304200.1	9	262	270	1.77389	DGSPTPDFY
SSTP_0000310700.1	15	30	44	2.24667	DRPPTGGYPNDPYPE
SSTP_0000312000.1	11	525	535	1.67755	TLSQRPPTSTK
SSTP_0000314600.1	17	191	207	1.93106	VRPWGAPSRPTPSGARG
SSTP_0000317300.1	14	67	80	1.81343	GNEAGDTRTDPKYT
SSTP_0000317300.1	9	166	174	1.80133	VKETQPKTK
SSTP_0000317300.1	12	189	200	1.80317	DAGETCPPGEHK
SSTP_0000317500.1	10	213	222	1.6873	GNEEKEGKSP
SSTP_0000320800.1	9	262	270	1.78322	DGSPTPDFY
SSTP_0000322200.1	26	558	583	1.80788	STPSPTTTTTTTTTTTTTTTPTTTTS
SSTP_0000322200.1	19	771	789	2.36316	STPSTTTPPPSTTTPPPCV
SSTP_0000322200.1	30	972	1001	2.52287	SSPPTTTTPPPTTSTTPPPTTSTTPTPPGC
SSTP_0000322200.1	16	1188	1203	2.24069	SITTPPPSTTTPPPCV
SSTP_0000322200.1	28	1386	1413	2.52704	SSPPTTTTPPPTTSTTPPPTTSTTPSPP
SSTP_0000323600.1	10	1148	1157	1.5675	NYDIEDDDDS
SSTP_0000326300.1	10	90	99	1.4547	SSKSSSRGRG
SSTP_0000326700.1	11	112	122	2.13755	FHPPEPDPDHW
SSTP_0000326700.1	13	453	465	2.05823	TPEPDEYTDSENP
SSTP_0000330300.1	9	95	103	1.65989	FTNGNGTGG
SSTP_0000337900.1	9	136	144	1.74467	NKPDPTKMA
SSTP_0000341800.1	11	269	279	1.82882	PEKVKPDDEED
SSTP_0000341800.1	17	331	347	1.61182	GGGGQHVPQTGGQVPQV
SSTP_0000344600.1	12	306	317	1.96358	QENRGAPAKKPT
SSTP_0000346100.1	14	436	449	1.57121	YSSGDSGFGDRSPS
SSTP_0000346100.1	9	540	548	2.18556	NPNGDENTN
SSTP_0000347400.1	9	48	56	2.12244	DSGPDPDDL
SSTP_0000348500.1	9	769	777	1.89756	EQRPKTDGS
SSTP_0000349600.1	10	1612	1621	1.7281	DRKSGSSSSK
SSTP_0000349600.1	11	1862	1872	1.69036	ENIQESDGDTS
SSTP_0000349600.1	9	2479	2487	1.70978	EDYPSPKGV
SSTP_0000372000.1	9	313	321	1.76644	NDGGDNEYD
SSTP_0000375300.1	9	106	114	1.80556	DETSDSTDP
SSTP_0000375500.1	9	113	121	1.47322	KTLPDAEGD
SSTP_0000382500.1	9	325	333	1.86267	DPQPNQAYG
SSTP_0000382600.1	9	325	333	1.86267	DPQPNQAYG
SSTP_0000383100.1	12	204	215	1.69167	QSASEKKDGKKG
SSTP_0000383100.1	10	371	380	1.9008	REEQAEPDGI
SSTP_0000383100.1	11	566	576	2.08109	FQKPKPPKGKQ
SSTP_0000383600.2	10	516	525	1.6139	TGNPHDSWEP
SSTP_0000387200.1	9	395	403	1.52267	KSEGDAKAT
SSTP_0000387300.1	12	730	741	1.73642	SKYNEDESDQEA
SSTP_0000387400.1	16	301	316	1.8715	EERTKEGTEKDEESNN
SSTP_0000394200.1	10	19	28	1.632	VRPGDKKGKR
SSTP_0000395700.2	10	22	31	1.7878	EETNEETDKE
SSTP_0000409300.1	9	255	263	2.12678	TAPPTDPEE
SSTP_0000409800.1	10	81	90	1.4793	ALDGGTSTTT
SSTP_0000412300.1	18	220	237	1.91928	AEKKEDKKPEKKEEDKKS
SSTP_0000412300.1	11	247	257	2.04036	VPQPEAEPEAP
SSTP_0000419900.1	13	841	853	1.63131	NSKKNQKKPQVSP
SSTP_0000424900.1	9	179	187	1.52433	DDVQDEAPL
SSTP_0000424900.1	9	779	787	1.824	TPIPPSGCQ
SSTP_0000424900.1	9	1307	1315	1.95889	DFGSPNPSK
SSTP_0000424900.1	10	1782	1791	1.7366	DVGDDGGRHS
SSTP_0000427500.1	10	201	210	1.651	DVPAPDMGTG
SSTP_0000432300.1	10	218	227	1.6145	SNPSSPLRKP
SSTP_0000432900.1	12	126	137	1.78	ECANDDPRNSQN
SSTP_0000435900.4	13	697	709	1.52231	QQEQDQKQHQQQQ
SSTP_0000435900.4	13	1143	1155	1.56431	EPDCGDRADEANC
SSTP_0000435900.4	13	2548	2560	1.89208	PNTGERKESPPAK
SSTP_0000435900.4	15	728	742	1.4292	EQQRREQQRQEQQQQ
SSTP_0000435900.4	10	838	847	1.5633	QTQPTSETIR
SSTP_0000435900.4	10	4023	4032	1.59	DIDSEDSDTT
SSTP_0000435900.4	11	1245	1255	1.77936	VQPPETNKQVP
SSTP_0000435900.4	11	2351	2361	2.04355	PRTPHEAPEPA
SSTP_0000435900.4	11	2566	2576	1.97345	PVEGKPPIPTA
SSTP_0000435900.4	9	1339	1347	2.173	APQPPPSLP
SSTP_0000435900.4	9	1546	1554	1.68356	EHESGQPAS
SSTP_0000435900.4	19	1960	1978	1.94321	RRGTPTDCQPEQPKPPCDC
SSTP_0000435900.4	16	2186	2201	1.76131	PPRPVVTPPEQTVNEG
SSTP_0000435900.4	12	2471	2482	1.70392	APRMGDPEIDPA
SSTP_0000435900.4	12	2696	2707	1.67442	IEWTGPNGGELP
SSTP_0000438000.1	10	227	236	1.5596	NLPKPDIGTT
SSTP_0000451500.1	17	66	82	1.63582	ANESEEDKKNKNASPNL
SSTP_0000451500.1	13	130	142	1.95469	SGSGAPATGGQGD
SSTP_0000469200.1	10	158	167	1.4296	TFDGMDPTKD
SSTP_0000470900.1	11	316	326	1.51709	TTPSLPPIPPS
SSTP_0000470900.1	9	455	463	1.70867	GKKDDLPPN
SSTP_0000478200.1	9	348	356	1.56456	TVDQGPQIS
SSTP_0000480600.1	9	28	36	1.53322	KSAPSTGGI
SSTP_0000480700.2	9	795	803	1.612	DNPSDNKKY
SSTP_0000480700.2	14	1497	1510	1.75807	DEDDIEEEEEEKAE
SSTP_0000480700.2	15	2346	2360	1.92433	NQSNEKEEKTPTQGD
SSTP_0000483400.1	10	200	209	1.5168	GQLNPDRKPN
SSTP_0000491000.1	9	97	105	1.87522	DSSDDGESV
SSTP_0000491000.1	10	118	127	1.8791	IPMPEPPKKP
SSTP_0000491000.1	16	224	239	1.92094	TTSAPGTDGEDEVKMP
SSTP_0000494700.1	9	1126	1134	1.68267	GTTSNNTST
SSTP_0000497700.1	10	184	193	1.9285	VSAPTTTPKP
SSTP_0000499400.1	14	27	40	1.92507	SSPFPDSEGPSNLR
SSTP_0000499800.1	9	202	210	1.654	DVPAPDMGT
SSTP_0000500200.1	9	330	338	1.68689	EPLPGMPPQ
SSTP_0000500200.1	53	357	409	2.01979	PYEEAVQGGTEYPSSNPTSNPTPNPPYPAGNSGQQQPYPSYDQQYGGGHQQYG
SSTP_0000500200.1	33	419	451	1.70685	QQYGGNQQYGGNQQYDGQQQYGGQPQYGDNSAG
SSTP_0000504600.1	10	58	67	1.6369	SKGTDPETIQ
SSTP_0000504600.1	35	307	341	2.0114	EPADETTTEESKKEEKDGEKKEGEEKEDSEKPKTK
SSTP_0000504600.1	11	781	791	1.934	DEKEQPKDEEN
SSTP_0000506200.1	10	559	568	1.7305	TPIQQPPQHH
SSTP_0000511900.1	17	105	121	1.70294	VTQPPRPTARPFSRNPE
SSTP_0000511900.1	25	127	151	1.86804	EKPAPRPTIPPKTAKPGVTQAPPNN
SSTP_0000513200.1	20	36	55	1.7441	PSGPTNTNQNTNHNTNQNTN
SSTP_0000516200.1	10	19	28	1.6485	AKPSATPNNI
SSTP_0000517400.1	30	512	541	1.96897	NVPNDEAKEGEEKAPEQQQQQQQQQQPPAA
SSTP_0000517400.1	26	755	780	2.28869	KPKVEPPKEEPPKKEKKEPAPQAEEH
SSTP_0000521800.1	10	160	169	1.8226	TMSSQTPKPS
SSTP_0000521800.1	11	809	819	1.65427	SPTNRKKSSNS
SSTP_0000524700.1	12	135	146	1.72942	GPNEKQPPVDLG
SSTP_0000524700.1	9	150	158	1.59044	TSDFPPLDP
SSTP_0000527900.2	9	116	124	1.86544	KNNPSPDNK
SSTP_0000528000.1	10	336	345	1.8549	DKNKPGPYQK
SSTP_0000528300.1	14	430	443	1.64786	ENYDNKNGNKYEGN
SSTP_0000532300.1	9	10	18	1.72478	KEPPKIPRY
SSTP_0000532300.1	9	461	469	1.71711	TQQKAPDES
SSTP_0000532300.1	11	440	450	1.91164	ESSEEDEEQEA
SSTP_0000536700.1	12	99	110	2.04775	PNIDQPDPTTTT
SSTP_0000536900.1	23	55	77	1.73965	PGKGSSSHHPSKNTTTTKRPPTV
SSTP_0000538500.1	18	58	75	1.94578	NDDTSSQKNNNNTPDKPL
SSTP_0000538600.1	12	59	70	1.6385	DNTNNQKNDVNT
SSTP_0000538700.1	9	731	739	1.898	DGPSKPLDS
SSTP_0000538700.1	11	986	996	1.94109	NYGRGGKPDSE
SSTP_0000542000.1	17	642	658	2.06582	EGAAGGQQPEEESTDKD
SSTP_0000551100.1	12	8	19	1.72583	GVGAPPVPGLDP
SSTP_0000551100.1	12	614	625	1.83525	DSNNDKNDNNKK
SSTP_0000551100.1	20	893	912	1.8274	STTPTSNTTDNTSFPSPPSE
SSTP_0000551100.1	9	958	966	1.73189	SISPTTPDT
SSTP_0000551100.1	13	1052	1064	1.83323	SENSDKEKSPNTT
SSTP_0000559400.1	10	28	37	1.5931	KSAPSTGGVK
SSTP_0000560400.1	9	5	13	1.70856	VPPGDITTQ
SSTP_0000568200.3	19	1082	1100	1.62305	DNNNNNETNEEKVQNDNST
SSTP_0000569500.1	15	485	499	1.67467	FKTPKKATSKTPGRT
SSTP_0000570600.1	9	544	552	1.87244	ETPKDKKEK
SSTP_0000570600.1	9	1625	1633	2.11311	TDNDDPRTD
SSTP_0000570600.1	9	1687	1695	2.11122	KGRPPKEGS
SSTP_0000573000.1	21	475	495	2.03167	GKKGGSDAGTEEESTEEEPTH
SSTP_0000585100.1	14	244	257	1.97964	DPDPDSSGFEESPR
SSTP_0000585200.1	11	201	211	1.58382	WEEGGDTIKPS
SSTP_0000590200.1	9	1197	1205	1.69689	GSYEDEYDE
SSTP_0000597900.1	10	143	152	1.738	VDPNKKKQPP
SSTP_0000601000.1	15	92	106	1.63987	VTPGQAYSAPPTLSP
SSTP_0000601000.1	9	779	787	1.56989	GMGPEHSSA
SSTP_0000601000.1	9	884	892	2.09633	DGTPSQNPS
SSTP_0000601000.1	9	982	990	1.97111	KPSSSPATG
SSTP_0000604700.1	9	23	31	1.85089	GTSSPAPAT
SSTP_0000604700.1	13	534	546	1.60523	VTTTTTTTSTTTT
SSTP_0000613000.1	15	6	20	1.9662	PPSKDEKDYTNSGDS
SSTP_0000613000.1	10	433	442	1.6476	QEIPGRAPSK
SSTP_0000614100.1	9	234	242	1.62333	SSVSGSSNG
SSTP_0000615400.1	18	262	279	1.95394	VTSEQPGQGGETEPMQQD
SSTP_0000638700.1	9	96	104	2.07744	DDSNPKNGT
SSTP_0000640500.1	9	281	289	1.53022	YTDADAEKA
SSTP_0000645700.1	10	25	34	1.5222	SASKSAEENK
SSTP_0000645700.1	10	379	388	1.3683	TSEQSTQEVT
SSTP_0000646200.1	10	32	41	1.9353	PGSGKGTQAP
SSTP_0000647400.1	10	575	584	1.5646	VPSENEPRLP
SSTP_0000647400.1	10	1717	1726	1.9465	KSGSEEPQQK
SSTP_0000647400.1	9	646	654	1.99689	SKPDPYSPC
SSTP_0000647400.1	11	926	936	1.94682	CPGGPGSGSQH
SSTP_0000647900.1	10	36	45	1.9189	RKCSDGPNPP
SSTP_0000647900.1	11	214	224	2.027	KCSDDPNKPKP
SSTP_0000647900.1	9	462	470	1.67322	WRRPPKKPK
SSTP_0000649200.1	9	293	301	2.17189	AKQPNQPPT
SSTP_0000649300.1	50	106	155	1.83102	EEKTKSEDESSNNSKNVDKTEEDKSSKEYNNESSNDSEQENEEKEEEDND
SSTP_0000649300.1	50	313	362	1.79284	ELEEDSKDNEEENDNSTNEEEKSDESESTESEQISDEKSENDISSNEDAE
SSTP_0000649300.1	11	162	172	1.96436	EDSTQEEEESE
SSTP_0000649300.1	14	182	195	1.827	IENDNENDKNDDTT
SSTP_0000649300.1	14	245	258	1.94864	NDNESNKDDDTTEY
SSTP_0000649300.1	18	201	218	1.96161	SSNDSEQESEEKEEEDNG
SSTP_0000649300.1	10	224	233	1.623	TEDSNHKEEE
SSTP_0000649300.1	13	263	275	1.77654	INDSEKESEEKED
SSTP_0000649300.1	25	283	307	1.89152	TEDSTQEEEESNNESGKKNDSEEYS
SSTP_0000653000.1	9	982	990	1.57789	PVRPPKPAI
SSTP_0000659000.1	10	412	421	1.8854	KETSPPAKDC
SSTP_0000659900.1	9	1586	1594	1.49167	DIDDNSTSN
SSTP_0000659900.1	10	2514	2523	1.528	INSESGGTEE
SSTP_0000659900.1	16	3232	3247	1.7775	QDGETKFEDDKNNEDD
SSTP_0000660200.1	10	169	178	1.9599	KRGGKPPTAE
SSTP_0000667900.1	9	157	165	1.38633	PGYNTTTTT
SSTP_0000667900.1	9	253	261	1.57144	EEVCPPNSE
SSTP_0000667900.1	10	554	563	1.5187	STTTRRPTTT
SSTP_0000668100.1	11	391	401	1.57773	TTTEKPTMKPT
SSTP_0000670800.1	9	96	104	2.06344	DDSNPTNGN
SSTP_0000670900.1	9	56	64	2.04556	DDSNPTNGT
SSTP_0000674700.1	26	41	66	1.96692	PPYCKPPPCKPIPPPTCEPVPPPTCE
SSTP_0000674700.1	24	82	105	2.33496	LKPSKPPKPSTPQKPKTTPKGTTT
SSTP_0000694500.1	9	2	10	2.04189	QKKPPEDDS
SSTP_0000694500.1	9	181	189	1.99411	AEDDDESPL
SSTP_0000699200.1	21	68	88	1.81343	EDNRSPEANDNSEIPPHREEE
SSTP_0000699800.1	12	817	828	1.73358	PPVSASPSSSSR
SSTP_0000710200.1	12	65	76	1.59783	YPDGTPLEKNED
SSTP_0000710200.1	9	182	190	1.45878	QVLPTDDEG
SSTP_0000710200.1	13	234	246	1.60054	VDESGKPIPTSSK
SSTP_0000710200.1	13	460	472	1.60054	VDESGKPIPTSSK
SSTP_0000710200.1	10	252	261	1.6762	SETGQPLPTD
SSTP_0000710200.1	10	478	487	1.6762	SETGQPLPTD
SSTP_0000710200.1	10	812	821	1.7754	QVLPTDDEGK
SSTP_0000710200.1	11	799	809	1.71336	PTDSSKRPIGP
SSTP_0000713300.1	15	365	379	1.7954	GGEKETGGGRESGSD
SSTP_0000718700.1	11	65	75	2.00782	DGSDEPGTSAC
SSTP_0000718700.1	9	243	251	1.61422	SDGNKEVTD
SSTP_0000718700.1	48	290	337	1.82537	NNEKESKKEGENGHDNEKDTESDESKDEDSEHKVETEDDEVGQKPEYD
SSTP_0000718800.3	9	395	403	1.52267	KSEGDAKAT
SSTP_0000725900.1	28	7	34	1.90236	SEKGDRGDDGFPGYAGQPGQPGDCGYPG
SSTP_0000725900.1	28	397	424	1.975	GPKGERGNDGLPGPDGFPGTPGLPGEQG
SSTP_0000725900.1	11	46	56	1.80209	IQGPPGRDGLP
SSTP_0000725900.1	11	608	618	1.60491	LSIPGPRGEQG
SSTP_0000725900.1	11	685	695	1.62609	LSGPQGYPGLE
SSTP_0000725900.1	14	67	80	1.87336	EIGDPGYPGQKGFP
SSTP_0000725900.1	14	107	120	2.13586	IPGNPGPTGEKGHR
SSTP_0000725900.1	14	374	387	1.60636	GLPGEKGFPGAPGF
SSTP_0000725900.1	29	130	158	2.12648	GVPGEKGDSGYPGMDGYPGPQGPDGPIGL
SSTP_0000725900.1	29	542	570	2.03228	KIGIPGQPGEPGDNGADGFPGERGNPGLP
SSTP_0000725900.1	13	161	173	2.03169	RKGESGTPGRPGM
SSTP_0000725900.1	21	210	230	2.16214	GQKGERGPPGYPGVPGPEGLE
SSTP_0000725900.1	21	428	448	1.70967	LPGKDGFPGLPGEPGLPGGRG
SSTP_0000725900.1	9	252	260	1.54711	GIPGKKGRD
SSTP_0000725900.1	9	314	322	1.79211	GRDGQPGKA
SSTP_0000725900.1	9	362	370	1.61656	GLPGEKGHD
SSTP_0000725900.1	9	574	582	1.73322	GIPGDTGYQ
SSTP_0000725900.1	9	929	937	1.82011	GLPGQPAPY
SSTP_0000725900.1	30	274	303	1.8052	DSIPGAPGLPGLPGEKGDSGRPGLPGPQGL
SSTP_0000725900.1	20	339	358	1.91175	YSGRDGEPGECGESGNDGMP
SSTP_0000725900.1	39	457	495	2.03703	GKKGRDGERGNDGWPGLPGTDGEPGIDGQRGPDGEPGFP
SSTP_0000725900.1	24	499	522	1.68658	GLPGDNGYSGPDGLQGPIGEPGVD
SSTP_0000725900.1	15	526	540	1.8388	GLPGEQGEDGFPGRP
SSTP_0000725900.1	10	645	654	2.1768	GPVGPPGDEG
SSTP_0000725900.1	10	1069	1078	1.791	GRPSGQDLGS
SSTP_0000725900.1	22	714	735	1.91155	GIDGKPGEEGECGDSGEDGLPG
SSTP_0000725900.1	22	1009	1030	2.007	GRQGKSGSPGYSGSPGQRGRPA
SSTP_0000725900.1	58	737	794	1.74102	PGYAGEPGVSGIPGKKGRDGVPGVQGERGEDGFPGLPGEDSISPPGEVGYPGPPGMDG
SSTP_0000725900.1	91	799	889	1.84	PGLPGERGDDGLPGIPGSDGLPGDDGLPGYPGEKGLPGIPGKNGRDGNPGLPGLPGNDGLPGQRGEDGVPGYPGIPGEPGKDGLPGYPGEV
SSTP_0000725900.1	18	906	923	1.70661	ERGDDGFPGIPGKDGRDG
SSTP_0000725900.1	45	946	990	1.96642	GLPGDPGYPGEKGYPGLPGNTGLPGPPGLAGYPGNRGAPGDDGLP
SSTP_0000730200.1	9	202	210	1.68467	ITKGDGTGG
SSTP_0000733800.1	9	307	315	2.636	VPPPPPGAN
SSTP_0000734000.1	9	210	218	1.56278	DKDVSGWGE
SSTP_0000734000.1	17	316	332	1.66753	VQSPQRGSAAPAGQKKK
SSTP_0000737100.1	9	115	123	1.59311	EGRDKDNIE
SSTP_0000748900.1	11	425	435	1.71136	GRYDDGDEDNF
SSTP_0000750000.2	14	8	21	1.73957	SGSSKSKKDDKKEK
SSTP_0000750000.2	16	723	738	1.68463	PSSKEKVQKQEDESPK
SSTP_0000750000.2	11	2357	2367	1.71164	NDTTDNDKTTI
SSTP_0000767500.1	12	114	125	2.09517	DEDESDDEDPFG
SSTP_0000767500.1	13	148	160	1.78015	GGEDGMDDDDEEL
SSTP_0000767500.1	24	166	189	1.92642	VDESDDSKKENKNEKEKGPEEVPN
SSTP_0000770200.1	10	71	80	1.8377	FKGPNNPSQN
SSTP_0000773100.1	11	76	86	1.90155	NGYTGEDDNSD
SSTP_0000780000.1	31	36	66	1.67858	NNSSSGTVSKSTSTPPIVPPTTTPTYNGPIS
SSTP_0000783000.1	26	216	241	1.67777	PIPPRQSRQDPITPYPAGSYGTGAGY
SSTP_0000789900.1	13	214	226	1.69062	CNGSGTTESADTN
SSTP_0000789900.1	13	336	348	1.94892	GQNVPPPPTQYGV
SSTP_0000789900.1	18	287	304	1.9455	NSAPQPPQTFNAPPSSQT
SSTP_0000789900.1	12	323	334	1.63417	VPSPYQQSTPST
SSTP_0000789900.1	38	367	404	1.95089	QFAPTPGQQPRPYQPGFPQQQQHQSSPQPQYPPGVQQQ
SSTP_0000789900.1	59	406	464	1.92702	QGQQQQQHPVSHPPTPAQPQHPMPGQGYPGGVPPPTSMPPVGAPGTNPFARPNQGHPTY
SSTP_0000797700.1	9	66	74	1.88378	PDAPSRKEP
SSTP_0000802500.1	21	190	210	2.219	QHSPSSPNAPNSGGSGSSGPN
SSTP_0000806500.1	10	526	535	1.8752	SPGGQGTTPF
SSTP_0000810300.2	9	407	415	1.78089	SPPGGDFAD
SSTP_0000815700.1	26	42	67	2.00696	PQQNNIESGNQSSSPPEVPPPEVEVA
SSTP_0000815700.1	12	83	94	1.71892	TKESGGDSNNRY
SSTP_0000817100.1	10	327	336	1.6961	NDPLSPGNDQ
SSTP_0000817100.1	12	348	359	1.87392	APDYPPAGDGWV
SSTP_0000818500.1	9	29	37	1.48678	SAPATGGVK
SSTP_0000818700.1	9	19	27	1.51111	VRPGDKKGR
SSTP_0000819700.1	19	153	171	2.20737	TTTPPPTTTTPIPSPPYPI
SSTP_0000826500.1	10	141	150	1.6614	PKEAEGEKRE
SSTP_0000826500.1	10	679	688	1.9675	DNDQDSDSET
SSTP_0000835500.1	14	225	238	2.40164	TTPKPPPAPTQAPS
SSTP_0000840100.1	14	30	43	2.86179	CPTPAPPPPPPPVH
SSTP_0000840100.1	9	265	273	2.36811	RPQDPPNPS
SSTP_0000840500.2	14	745	758	1.81521	HCGPPERREEKPSN
SSTP_0000860800.1	9	107	115	1.59289	FTRGDGTGG
SSTP_0000860800.1	9	186	194	2.14422	PTHPGDKPK
SSTP_0000863800.1	13	610	622	1.69077	TTPTSTQSPIDNK
SSTP_0000864300.1	11	204	214	1.49682	WEEGKDTINPS
SSTP_0000876400.1	12	290	301	2.39667	NPPGPPTSTPIP
SSTP_0000876400.1	17	787	803	1.73771	PAPPGTCQNGGVPNPYN
SSTP_0000886200.1	26	616	641	2.09538	GGAPGGMPGGAPGGGASGAEGSGPTI
SSTP_0000894300.1	10	176	185	1.6533	IPSPTNKMGS
SSTP_0000894800.1	10	70	79	1.8082	THGGPSDENR
SSTP_0000899200.1	9	2	10	1.70778	KSAPPNSGM
SSTP_0000900800.1	10	907	916	1.806	NNDDSDKSTS
SSTP_0000900800.1	18	923	940	1.88322	SDRSEKSDTGSNPDFPRS
SSTP_0000900800.1	9	1431	1439	1.50956	TSDINKTTP
SSTP_0000906000.1	12	47	58	1.56892	NYDDNGPCGPCN
SSTP_0000912000.1	11	372	382	1.99855	KNGNDDSNNNK
SSTP_0000918100.1	23	394	416	2.10887	QNNQNGNDTEGGSNNNQQPSSSP
SSTP_0000918100.1	11	446	456	1.824	SFPDPPDYSGL
SSTP_0000922900.1	9	102	110	2.19122	SYNPPEPSQ
SSTP_0000922900.1	12	446	457	1.82717	PSPKDYTDAENP
SSTP_0000929400.1	11	527	537	1.98382	GNPNKNPDGTF
SSTP_0000931000.1	10	12	21	1.7648	DEKSDSSDHE
SSTP_0000931000.1	10	40	49	1.9355	GNGPNDNKKN
SSTP_0000931000.1	10	199	208	1.6345	SPLDGENAND
SSTP_0000931000.1	12	73	84	1.76592	LDDSNKPGSTKD
SSTP_0000934100.1	9	395	403	1.75356	VTKPDTEKP
SSTP_0000934100.1	13	769	781	1.77277	ASGEEAEKEDGEV
SSTP_0000934100.1	13	785	797	2.10831	ISPESDSSEPTEE
SSTP_0000934100.1	11	1016	1026	1.81282	DGKTPSRGSRN
SSTP_0000934100.1	10	1044	1053	1.7187	TAARGPNSEG
SSTP_0000934100.1	12	1210	1221	1.76383	SEQQTEEESEEH
SSTP_0000934100.1	23	1226	1248	1.90443	MEQQPQASEVQNDESPQKPPNDF
SSTP_0000934100.1	31	1311	1341	2.33048	QGQPQQPQQPQQPQYPQQPQQPQHPQQPQRT
SSTP_0000938600.1	10	553	562	1.6464	TIPTQEDSVP
SSTP_0000938600.1	9	687	695	1.67367	DDNSNPKID
SSTP_0000938600.1	9	1156	1164	1.67144	QFKDEGEKD
SSTP_0000938600.1	29	1116	1144	1.88821	REKEEKGEKEEKGEKEEKGEKEEKEEKEV
SSTP_0000938600.1	12	1386	1397	1.43917	PAEGEGKEIATT
SSTP_0000938600.1	18	1420	1437	1.78	TKSESTAEEATPTTTTTT
SSTP_0000938600.1	13	1502	1514	1.755	EPKGTDENVPSQT
SSTP_0000938600.1	15	1847	1861	1.74773	GEGQTTENNDNVPEG
SSTP_0000938600.1	15	1920	1934	2.18467	PRYGHPPPPHQTSPM
SSTP_0000940500.1	18	638	655	1.98106	ASSSGSEEKKEEPKKEEK
SSTP_0000942500.1	10	396	405	1.7869	DEGDENETAE
SSTP_0000942500.1	13	411	423	1.69785	KKSSESSEEKENH
SSTP_0000942500.1	34	428	461	1.96379	EQEHEGEEKEKEEGEGENNNENKSSGEKGEESAS
SSTP_0000942800.1	9	368	376	1.63911	EEQSDGEKT
SSTP_0000942800.1	10	474	483	1.9134	MPRPKDSPRH
SSTP_0000950100.1	12	118	129	1.62442	NTYPHDGEKWPK
SSTP_0000950200.1	51	49	99	2.17831	SMGTPGPQGPPGSPGIRGFPGPEGMPGPKGQKGAQGPPGPHGMKGDKGPMG
SSTP_0000950200.1	39	102	140	2.28379	GFPGNDGTPGRPGEPGPPGQPGWDGCNGTDGAPGLPGLP
SSTP_0000950200.1	33	146	178	1.85518	PGFPGPPGIPGAKGEPAIGYDGAPGEKGDAGMP
SSTP_0000950200.1	36	182	217	1.99808	GLPGAPGRDGFPGEKGDRGEQGLPGPRGPPGEVGLP
SSTP_0000950200.1	20	225	244	2.12455	IGPKGESGDRGPPGLPGPSK
SSTP_0000950200.1	20	480	499	1.70065	GRKGEPGLPGLRGPPGDSLN
SSTP_0000950200.1	20	766	785	1.7363	GLDGAPGFPGIPGPKGESGL
SSTP_0000950200.1	20	1017	1036	1.78365	GEAGQPGYGMPGAPGEKGLP
SSTP_0000950200.1	20	1234	1253	1.6828	GESGQPGFPGVKGEPGLPGL
SSTP_0000950200.1	23	267	289	2.01409	GEKGEPGEFGPRGYPGQPGAPGI
SSTP_0000950200.1	23	1419	1441	2.07778	GLEGPPGLPGQPGISGPPGAPGQ
SSTP_0000950200.1	25	299	323	2.07296	KGLPGPVGPRGKDGSPGLPGPPGFK
SSTP_0000950200.1	70	342	411	2.68354	GDQGYPGRDGPKGNRGPPGPPGGGIDGDGPPGPPGPPGRTGQPGPVGNDGKPGLPGPPGPIGPPGGPGLP
SSTP_0000950200.1	56	419	474	2.11843	MPGAKGEKGNSGYPGSPGEPGAPGLPGLPGPKGEPGPRGTDGKSIPGIPGKDGRPG
SSTP_0000950200.1	21	503	523	1.69505	GLPGERGLPGPKGYDGRDGVP
SSTP_0000950200.1	10	527	536	1.7603	GLPGEKGDRG
SSTP_0000950200.1	10	557	566	1.8964	GMPGPQGERG
SSTP_0000950200.1	10	1589	1598	1.5854	GAEGGGQSLS
SSTP_0000950200.1	41	569	609	2.37207	GLPGAPGDQGDDGFPGAPGRPGPPGPPGKDGLPGFPGQKGE
SSTP_0000950200.1	47	618	664	1.92589	GPPGYPGLKGEPGFPGTPGAPGLPGKDGFPGAPGLPGMPGEKGEPGL
SSTP_0000950200.1	22	667	688	1.79636	LPGRPGNDGLPGLPGPKGAPGF
SSTP_0000950200.1	15	710	724	2.27167	GLQGPPGLPGPPPAE
SSTP_0000950200.1	27	790	816	1.95126	GLPGEPGAPGQTVVGPPGQPGFPGMKG
SSTP_0000950200.1	19	818	836	1.68195	SGLPGLPGQPGFPGQKGNA
SSTP_0000950200.1	29	841	869	1.97786	LPGTEGQPGAPGFPGQPGLTGEKGEPGLP
SSTP_0000950200.1	18	881	898	1.68578	SGFPGAPGLPGAAGQPGL
SSTP_0000950200.1	17	912	928	1.85535	GIKGEPGFPGAPGQPGL
SSTP_0000950200.1	17	948	964	1.99529	GFPGTPGADGQPGFPGV
SSTP_0000950200.1	32	976	1007	1.61103	LKGEPGLPGFPGTKGEAGFPGAPGLPGKDGLP
SSTP_0000950200.1	68	1043	1110	1.86632	GRQGAPGPPGLDGQPGFPGLKGEPGFPGQPGFPGQDGLPGLPGEKGDSGIPGLPGAPGPVGAEGPRGV
SSTP_0000950200.1	30	1142	1171	1.5614	GLDGKPGLPGLPGAKGEPGLPGLPGQEGLP
SSTP_0000950200.1	26	1187	1212	1.97369	GLPGKSIPGAPGQPGQPGFPGKDGLP
SSTP_0000950200.1	28	1263	1290	1.95221	PGLPGRDGQPGFPGEKGNSGYPGAPGLK
SSTP_0000950200.1	24	1323	1346	1.85054	SGFPGQPGLPGKDGLDGPPGLPGL
SSTP_0000950200.1	34	1376	1409	2.24941	PGLDGPPGPNGPPGFPGQKGDAGYPGAPGLPGEK
SSTP_0000955200.1	9	5	13	1.71944	VPPGDIQTQ
SSTP_0000961300.1	14	372	385	1.9215	REEQAETDGTEDAE
SSTP_0000961300.1	11	567	577	2.12236	FEKPKPPKGKQ
SSTP_0000961300.1	10	643	652	1.8683	GKGGGGKKKG
SSTP_0000961400.1	10	509	518	1.4666	LNPKDGKYEF
SSTP_0000967200.1	14	114	127	1.671	ESIDDSENADKTEE
SSTP_0000967200.1	36	150	185	1.90528	SNKSEENNEEKEKEEKGEDNESIEDESGKEDDNEEY
SSTP_0000967200.1	12	196	207	1.83567	ESESTEEEENDS
SSTP_0000967200.1	31	213	243	1.80613	EENSTEEEKESGDNESMEKENGKENDNEEYS
SSTP_0000967200.1	9	254	262	1.78556	SESTEEEEH
SSTP_0000967200.1	99	271	369	1.94381	ENSTQEEEGSEENNNESGRNDDTNEYSNESNKKSDEESKNTEEEEEDDDKTKSTEEDDDKIKSTEEDSTYEDEENEYDDETKEKDDSNREEEESEDDIS
SSTP_0000975300.1	10	62	71	1.8728	KKANESGGGG
SSTP_0000975300.1	14	247	260	1.807	GSGSGSEENNGKKK
SSTP_0000977800.1	44	15	58	1.7007	AYDYDDGDEDYYDEDYGDNYYSTPKPKQTPVKKTNTPKADTNKK
SSTP_0000977800.1	13	74	86	1.84246	TEPSKVPPSTTNN
SSTP_0000988900.1	9	1	9	1.55844	MPNESHSPN
SSTP_0000988900.1	9	833	841	1.63833	NDKAPSQNV
SSTP_0000988900.1	12	84	95	1.54642	EYCDKKKPGTAG
SSTP_0000989700.1	13	303	315	1.708	HTDNNTKEEEKET
SSTP_0000989700.1	9	392	400	1.716	EEEVNEDPD
SSTP_0000989700.1	20	1055	1074	1.79345	DDESECDDERNDNEEDHKNE
SSTP_0001002200.1	15	1	15	1.64153	MAPAPQTPIPQFPSS
SSTP_0001002400.3	10	572	581	1.7691	IGNNSDTPTT
SSTP_0001002400.3	9	712	720	1.70833	NSSSGENNY
SSTP_0001002400.3	9	745	753	1.44178	SYSSNNSHN
SSTP_0001002400.3	15	725	739	1.5156	ISSNSSSTTSSTSSA
SSTP_0001002400.3	14	785	798	1.95079	NSTNNPSNGSPYKN
SSTP_0001002400.3	19	833	851	1.70005	GLPSGNNQSYGGTSNGNSN
SSTP_0001003100.1	10	131	140	1.8619	ASNPKKGDAT
SSTP_0001006300.1	9	127	135	1.83522	PNSENDSTV
SSTP_0001006300.1	9	1109	1117	1.87278	NSSSESSSN
SSTP_0001006300.1	9	1275	1283	1.81322	DVPSNTPTE
SSTP_0001008500.1	31	267	297	1.94055	RPGPTAKPSIRTPSPPKITGRPAPRPPSNRI
SSTP_0001008600.1	10	89	98	1.7487	TTPRPNKPVR
SSTP_0001008600.1	29	104	132	2.16021	TRRPQPPKPNPRPSSRIPPKPVKPATQST
SSTP_0001008700.1	23	105	127	1.73396	RPSRPRPSSRIPPKTVKPGTKST
SSTP_0001008800.1	54	11	64	1.90202	KTPRKKPLPRKRTPRPNKPVRPSSKRTRRPQPPKPNPRPSSRTSPKTVKPRTKS
SSTP_0001008900.1	26	280	305	1.60719	NAPGKKPLNSKTTPRSQKPVRPASKS
SSTP_0001008900.1	25	315	339	1.60724	KTPKTTKRPVKPTRKTPKTTKRPVK
SSTP_0001008900.1	14	363	376	1.74814	KAPKTPAKPSSVAT
SSTP_0001008900.1	10	394	403	1.6544	VTEKPPNNRI
SSTP_0001019300.1	10	320	329	1.6785	SQVPDKEEDI
SSTP_0001019300.1	14	368	381	2.37907	DNDSDNEEDEEDDD
SSTP_0001025300.1	34	23	56	2.03003	KDSSSNYGPALSPPAYGPPPAYGPPPFAPPPFGG
SSTP_0001025300.1	30	91	120	1.99353	SMGDDVPSGGYGGPGPQGYGSSQPQGYGAP
SSTP_0001025300.1	22	178	199	1.93041	NNQGHAPNGGSYGGASAPPEEG
SSTP_0001029200.1	9	261	269	1.41478	QLNPNRQPS
SSTP_0001032500.2	9	189	197	1.84122	NDKNSEPKQ
SSTP_0001036300.1	13	22	34	2.03877	NSPFPESQDGKNS
SSTP_0001036300.1	16	114	129	1.713	SPIEPSTNLTPDDSGN
SSTP_0001036300.1	9	207	215	1.92811	SPGSTDDSL
SSTP_0001036300.1	9	980	988	1.75678	NDENDKNKN
SSTP_0001036300.1	12	1000	1011	2.01008	NETSEDESDSDN
SSTP_0001036300.1	43	1037	1079	1.94726	TSDEDVSDGSDVNSDSNSDTDDSSADNNEGSNSENDEHEKEDD
SSTP_0001040800.1	11	75	85	1.67127	TQQMNPPKYEK
SSTP_0001040800.1	11	563	573	2.16064	FQKPKPPKGKQ
SSTP_0001040800.1	9	202	210	1.60711	QSNKKKSDK
SSTP_0001041900.3	10	1186	1195	2.0408	MKPPEPDHSS
SSTP_0001041900.3	9	3622	3630	1.50089	HVDDDGTRT
SSTP_0001043000.1	9	986	994	1.91222	YGKGGEPDY
SSTP_0001045500.1	9	1589	1597	1.48311	ANKENEAEE
SSTP_0001045500.1	19	1960	1978	1.69105	NSSSDNLPGNDDAESVGTD
SSTP_0001050100.1	9	1153	1161	1.77278	QGSEDRSSG
SSTP_0001050700.1	11	830	840	1.82945	TPPSSTRGGES
SSTP_0001051700.1	11	1079	1089	1.80627	EVPPIPPPRKI
SSTP_0001052400.1	11	1	11	1.57655	MKQPDHDPCYD
SSTP_0001052400.1	9	572	580	1.88511	GECEEDEDE
SSTP_0001054600.1	14	1152	1165	1.63843	DTNEKSSHEDTDSY
SSTP_0001059100.1	13	345	357	1.749	IDEPPKDVNETED
SSTP_0001065800.1	36	84	119	1.99617	APTTTAPSTATTPKPSTTTTQQQQGTTPTNATGRPN
SSTP_0001065800.1	12	253	264	1.78717	DNNTNPTSRSQN
SSTP_0001065800.1	27	275	301	1.88063	NPWSSGGSNTANTPTNSSGARPGTNNR
SSTP_0001076600.1	16	9	24	1.98619	NESNDNESNDDETNEN
SSTP_0001088500.1	9	1	9	1.97189	MENPNEKDP
SSTP_0001088500.1	12	367	378	1.82792	EQAEADGEDEAK
SSTP_0001088500.1	11	560	570	2.12236	FEKPKPPKGKQ
SSTP_0001088500.1	11	634	644	1.90482	KEGGGGGKKKG
SSTP_0001091400.1	10	497	506	1.524	INNNDSKSST
SSTP_0001091500.1	20	26	45	1.7565	DSKDKDNSSEEKRGRKRPQT
SSTP_0001091500.1	29	373	401	1.6731	KPTNSPVYTPKPTNRPTYETTTSTSTTTT
SSTP_0001091500.1	12	548	559	1.53725	PAQKVETTPAPT
SSTP_0001091500.1	10	695	704	1.8457	TLPSPTPEKV
SSTP_0001091500.1	9	768	776	1.713	QRTTPSPTV
SSTP_0001091500.1	14	984	997	1.75557	APACGGSGPTEFTP
SSTP_0001092400.2	12	177	188	1.97858	SRNCTPPESNPP
SSTP_0001092400.2	14	364	377	2.13286	YWPDQPPANTNTSE
SSTP_0001092400.2	9	762	770	1.51856	ETSPKAPFR
SSTP_0001092400.2	13	862	874	1.91369	IEGRTGEGDPGVT
SSTP_0001092400.2	11	1314	1324	1.73764	EYGDGDPGRFT
SSTP_0001092800.1	12	157	168	2.0195	TTTPRPKPTSTV
SSTP_0001092800.1	9	175	183	1.88733	LPPPPSSSN
SSTP_0001093000.1	12	28	39	1.61583	RQSGSYSTGSGG
SSTP_0001101900.1	9	1334	1342	1.98089	TNTPSPSFP
SSTP_0001103900.1	10	646	655	1.9367	IDGPQTPGQN
SSTP_0001106300.1	21	18	38	2.051	SNNNGEEKNDDGEKNENDNTS
SSTP_0001106600.1	12	321	332	1.59525	ATSTDTSTVGKN
SSTP_0001108500.1	12	257	268	1.71825	KKDQNVPDENGE
SSTP_0001108700.1	12	258	269	1.74292	KNKSQNNTDGDA
SSTP_0001108800.1	10	251	260	1.6293	KKKDQNNPID
SSTP_0001109200.1	12	328	339	1.84008	PDIGDDEEEDYS
SSTP_0001109200.1	10	817	826	1.7863	DEDADEESQE
SSTP_0001109900.1	12	95	106	1.48925	INEDNSNNNNYN
SSTP_0001109900.1	12	1305	1316	1.74275	QYSGSTESKPTT
SSTP_0001109900.1	12	1908	1919	1.74275	QYSGSTESKPTT
SSTP_0001109900.1	12	2810	2821	1.50467	STVTGETEATKE
SSTP_0001109900.1	24	321	344	1.99313	ETETPATYPENPGNTETTGETGKT
SSTP_0001109900.1	38	358	395	1.71389	PVTGESETTKEETVTEESETPATYPEYSSSTEGKPTTE
SSTP_0001109900.1	28	416	443	1.89082	KETESTGTKESEGTSETEATPETEQTVT
SSTP_0001109900.1	19	453	471	1.51553	ESTVTEESKETGKTESTVT
SSTP_0001109900.1	19	870	888	1.70053	ESKATGKSEATEETEPTIS
SSTP_0001109900.1	19	1058	1076	1.79579	ESEATEETEATDETEPTVT
SSTP_0001109900.1	19	1114	1132	1.53195	ETTVTGESEATKETEPTIT
SSTP_0001109900.1	19	1458	1476	1.53368	KATKETEATGETKSTVTGE
SSTP_0001109900.1	19	2493	2511	1.61321	ETTVTGESEATGETEATKE
SSTP_0001109900.1	19	2680	2698	1.48847	TVTAESEATKETESTVTGE
SSTP_0001109900.1	19	2722	2740	1.56226	EATKETESTVTGESEATKE
SSTP_0001109900.1	23	483	505	1.75217	DQEETETPATYPEYSGSTESKST
SSTP_0001109900.1	9	511	519	1.64156	SDKTGSPPL
SSTP_0001109900.1	25	553	577	1.60028	KATKETGATKETEPTVTAESEATKE
SSTP_0001109900.1	16	579	594	1.49575	EETISGETEGTETTVT
SSTP_0001109900.1	16	1940	1955	1.62444	SKETESTVSGGSEPTY
SSTP_0001109900.1	36	612	647	1.76122	EATKGTEPTVTGESEATKETEPTITGESEGTGETET
SSTP_0001109900.1	11	654	664	1.515	EATGETETTIT
SSTP_0001109900.1	11	732	742	1.55073	TVTGKTEATKE
SSTP_0001109900.1	11	822	832	1.46464	EATGKTETSVT
SSTP_0001109900.1	11	844	854	1.54155	TVTGESEATKE
SSTP_0001109900.1	11	1254	1264	1.47164	TVTEESEATKK
SSTP_0001109900.1	11	1396	1406	1.53164	TVTEESEATKE
SSTP_0001109900.1	11	1528	1538	1.53227	TVTGETEATKE
SSTP_0001109900.1	11	1604	1614	1.53027	TVTKETEATKE
SSTP_0001109900.1	11	1778	1788	1.61273	TVTGESEATGG
SSTP_0001109900.1	11	2563	2573	1.52164	EATSGTESTIT
SSTP_0001109900.1	11	2825	2835	1.46336	TVTGETEATKE
SSTP_0001109900.1	20	681	700	1.84425	TEATSETEPTATGESKATKE
SSTP_0001109900.1	20	1963	1982	1.8581	ETETPATYPENTESTQSKET
SSTP_0001109900.1	13	708	720	1.56454	ESKATGETESTVT
SSTP_0001109900.1	13	2028	2040	1.61162	ETTVTGESEGTRE
SSTP_0001109900.1	13	2700	2712	1.53569	ESTVTGETEATKE
SSTP_0001109900.1	27	744	770	1.69267	ETTVTGESEATEETEPTVTGESEATKE
SSTP_0001109900.1	27	1086	1112	1.60322	ETTVTEESEATKETEPTVTSESEATKE
SSTP_0001109900.1	27	1492	1518	1.59022	EATKETESTVTGESEATKETEPTVTGK
SSTP_0001109900.1	27	1658	1684	1.52563	ETTVTGESEATKETESTVTGESEATKE
SSTP_0001109900.1	27	1860	1886	1.67211	ETTVTGESEATKETEPTVTGESETTKE
SSTP_0001109900.1	27	2070	2096	1.57696	ETTVTGESEATGETESTVTGESEATRG
SSTP_0001109900.1	27	2286	2312	1.6473	ETTVTGESEATKETEPTVTGESEATKE
SSTP_0001109900.1	27	2465	2491	1.52252	ETTVTGESEATKETESTVTGETEATKE
SSTP_0001109900.1	44	772	815	1.60523	ETTVNGESEATKETEPTVTGESEATKETESTVTGESEATKETEE
SSTP_0001109900.1	31	900	930	1.63281	TVTGESEATKETEPTVTGESEATKETESTVT
SSTP_0001109900.1	48	940	987	1.61719	ESTVTGESEATKETEPTVTGGSETTKETESTVTGESEATKETESTVTG
SSTP_0001109900.1	47	998	1044	1.71409	TVTTESEATKETEPTVTGESEATKETEPTVTGESEATKETESTVPGE
SSTP_0001109900.1	33	1136	1168	1.67936	EATKETEATGENEPTVTGESEATYETEPTVTGE
SSTP_0001109900.1	26	1182	1207	1.68619	ESEATKETEATGETEPTVTGESEATY
SSTP_0001109900.1	14	1231	1244	1.6725	SEATKETEPTVTGK
SSTP_0001109900.1	17	1360	1376	1.86365	ETETPATYPENTESTQS
SSTP_0001109900.1	17	1752	1768	1.677	TGESEATSETEPTVTGK
SSTP_0001109900.1	21	1422	1442	1.49238	ETTVTGESEATKETESTVTGE
SSTP_0001109900.1	21	1698	1718	1.69586	ESEATKETEPTVTGESEATKE
SSTP_0001109900.1	21	1796	1816	1.56624	ESEATKETESTVTGESEATKE
SSTP_0001109900.1	34	1561	1594	1.67197	SEATKETESTVTGESEATKETEATGETEPTVTGE
SSTP_0001109900.1	41	1616	1656	1.56198	ETTVTGESEATTETESTVTGESETTKETETTVTGESEATKE
SSTP_0001109900.1	41	1818	1858	1.76085	ETTVTGESEPTKETEPTVTGESKATKETEPTVTGESEATKE
SSTP_0001109900.1	10	2002	2011	1.5032	TVTEESEATK
SSTP_0001109900.1	10	2613	2622	1.5712	TVTGESEATG
SSTP_0001109900.1	54	2114	2167	1.65517	TATGESEATKETESTVTGESETTKETETTVKGESEATKETEPTVTGESETTKES
SSTP_0001109900.1	83	2202	2284	1.65102	ESTVTGETEATKETEPTVTGESKATKETEPTVTGETEATKETESTVTGESEETKETETTATGESEATYETEPTVTGESEATKE
SSTP_0001109900.1	43	2314	2356	1.64156	ETTVTEESEATKETQPTVTGESEATKETEPTVTGESEATETTA
SSTP_0001109900.1	81	2383	2463	1.62483	TVTAESEATKETEPTVTGESEATKETESTVTGESEATKETESTVTGESEATKETEPTVTGESEATGETESTVTGETEATKE
SSTP_0001109900.1	35	2519	2553	1.59049	ESEATGETESTVTGETEASKETETTVTGESEATKE
SSTP_0001109900.1	22	2777	2798	1.68732	SEATKETEPTVTGESEATETTA
SSTP_0001110400.1	13	165	177	1.87792	YNYDNPNEDKNSQ
SSTP_0001125600.3	30	4	33	1.60463	SSGASNSGSANAAGSSNNTNASTTTGSSSV
SSTP_0001125600.3	28	557	584	2.29154	STGNSPSSSPQPRKPNMPPSSASGSSPN
SSTP_0001125700.1	9	209	217	1.57322	LESTDGSEK
SSTP_0001125700.1	9	743	751	1.81711	EPKGGHGGH
SSTP_0001125900.1	9	310	318	1.83433	NEDKKSSDS
SSTP_0001125900.1	9	597	605	1.64844	SSPKDNEEV
SSTP_0001136400.1	9	522	530	1.66889	YDDKNGPYP
SSTP_0001137500.1	9	100	108	1.83278	PDAPSRHTP
SSTP_0001139800.1	10	153	162	2.0626	TDPSKSPPDN
SSTP_0001154400.1	9	1523	1531	1.81867	GAESDSDKA
SSTP_0001162100.1	9	152	160	1.65211	VTDPTKPMG
SSTP_0001163600.1	9	486	494	1.64	TTPATHSPM
SSTP_0001163600.1	14	504	517	1.6975	LPKGSSSTTPLPKK
SSTP_0001163700.1	10	100	109	2.015	YGDGQPKNTT
SSTP_0001163700.1	12	482	493	1.66642	NNNTSPTTTPIS
SSTP_0001171000.1	11	60	70	1.87018	SSSKDADNSSN
SSTP_0001172900.1	26	218	243	1.74508	KEVSDDEDDTKKEGDVEDVKEDEEKK
SSTP_0001173800.1	18	274	291	1.65289	KQPNDNVKKGDNNNDEVN
SSTP_0001183600.1	18	130	147	1.732	GQDPSTQNAPNLPPLPSS
SSTP_0001183600.1	9	263	271	1.50911	KLNPNSSKE
SSTP_0001183600.1	9	369	377	1.593	GDHPDMSGN
SSTP_0001186300.1	18	643	660	2.24767	GGAGPEGATPEGEDTEKD
SSTP_0001198800.1	16	643	658	2.19175	GGAGPEGATPGTEEAS
SSTP_0001198900.2	11	219	229	1.81682	NDQTPERNDFP
SSTP_0001198900.2	11	1300	1310	1.94636	YDPKPNEERTL
SSTP_0001198900.2	13	324	336	1.73715	AVTTTKAPPTPVT
SSTP_0001198900.2	9	1349	1357	1.72967	FPEPNPLSG
SSTP_0001198900.2	19	1920	1938	1.92711	PTVEPPGPTQTIPSQQTTQ
SSTP_0001199000.1	16	317	332	2.50263	PPVPPTTPGPSSPKSC
SSTP_0001199000.1	9	883	891	1.82111	EEETPEPFN
SSTP_0001199000.1	9	2026	2034	2.06456	PIDPPQTPG
SSTP_0001199000.1	15	1923	1937	1.51813	YGPTIETTTSSTNAS
SSTP_0001210700.1	24	242	265	1.52583	AASSAPAAAAAPAKKEEVKEESED
SSTP_0001210800.1	11	64	74	1.75536	NPSAEGEEMDD
SSTP_0001211500.1	27	58	84	1.71059	TNGYGSTNGGYGSGSTNGGYGQSQQTP
SSTP_0001211500.1	10	281	290	1.8043	QVPPRRPPVR
SSTP_0001214000.2	10	123	132	2.1212	SPAPPQTPVG
SSTP_0001214000.2	15	1574	1588	2.07613	PVLPDAPEPEKQPPQ
SSTP_0001214000.2	15	2901	2915	2.46113	APKEKSPSPPPEEFD
SSTP_0001214000.2	9	1708	1716	1.64611	PRPEPLERE
SSTP_0001214000.2	9	2238	2246	2.16178	APKPDKPEE
SSTP_0001214000.2	13	2370	2382	1.72262	PKQKEDDSADVSY
SSTP_0001214000.2	17	3032	3048	2.00871	APKPPMEEMPPPPKVQP
SSTP_0001214000.2	12	3954	3965	2.19483	GQQGPKENSPPQ
SSTP_0001214000.2	11	4220	4230	1.93064	VPTPPPEVDVP
SSTP_0001214400.3	9	506	514	1.70911	DEVPEQPTY
SSTP_0001214400.3	9	676	684	2.177	EESSQPSKP
SSTP_0001214400.3	9	2574	2582	1.94656	KKPDNPNGD
SSTP_0001214400.3	9	2962	2970	2.03211	GRPEEPPSD
SSTP_0001214400.3	9	4324	4332	1.73333	RSPGGGYTS
SSTP_0001214400.3	9	5212	5220	1.51111	LQQDDGATE
SSTP_0001214400.3	13	1898	1910	1.53908	GDKTDYTFPSEPN
SSTP_0001214400.3	10	1924	1933	1.8362	GPGPWSGPQS
SSTP_0001214400.3	10	2649	2658	2.1033	DESPPTAAPD
SSTP_0001214400.3	10	2749	2758	1.8637	SAPSSPGDLR
SSTP_0001214400.3	10	3254	3263	1.8885	SEGPGPWSEP
SSTP_0001214400.3	10	3537	3546	1.5882	DNFQSGSPKN
SSTP_0001214400.3	20	2031	2050	1.8314	LGPEETKEVSTDAQPPSAPP
SSTP_0001214400.3	14	2439	2452	1.95086	RTSQPSPEAQGRTG
SSTP_0001214400.3	12	2946	2957	2.0735	DKRGSPGPETHA
SSTP_0001218100.2	10	380	389	2.0569	PDKPGSKPEV
SSTP_0001218100.2	11	606	616	1.89436	KKPAPHPAPAN
SSTP_0001220700.1	15	191	205	2.18153	SENGEEDNDNDEDED
SSTP_0001223800.1	9	16	24	1.68844	PFSGQKPGT
SSTP_0001229200.1	12	317	328	1.7075	EDDSKVPDKEED
SSTP_0001229200.1	16	368	383	2.30262	GNDENNSDEEDDNDDN
SSTP_0001231400.1	13	118	130	1.525	NDLNDDTGKKKKT
SSTP_0001231500.1	10	162	171	1.4967	SYSYPTSGHD
SSTP_0001233200.2	10	529	538	1.5184	TQSSTSKNNK
SSTP_0001233200.2	11	634	644	2.32691	KSPEGEPNGDG
SSTP_0001233200.2	9	818	826	1.56578	NQDKEEEQK
SSTP_0001233200.2	12	895	906	1.63792	TTPRTSGSYETD
SSTP_0001236400.1	12	72	83	1.71025	IEPEEAEKDRKP
SSTP_0001236400.1	11	488	498	1.67645	TTTTTTTTPKP
SSTP_0001243800.1	13	217	229	1.54508	TTTTTSTPCTTEP
SSTP_0001243800.1	9	602	610	1.75722	TTTTTPTTT
SSTP_0001245200.2	10	239	248	1.7351	SKSSPPYSKK
SSTP_0001245200.2	9	788	796	1.816	TRSPSPEWR
SSTP_0001249500.1	12	378	389	1.48417	WGKEERKGNPFK
SSTP_0001256000.1	9	116	124	1.84378	TEGPEPSKT
SSTP_0001257900.1	9	19	27	1.57789	VRPGDKKGR
SSTP_0001265000.1	9	19	27	1.57789	VRPGDKKGR
SSTP_0001266300.1	9	102	110	1.43756	TSRKWDPNE
SSTP_0001266500.1	10	1155	1164	1.6066	DLKNSPENAT
SSTP_0001268400.1	9	289	297	1.85122	PGNTYPPSR
SSTP_0001268400.1	9	1249	1257	1.39011	NAPYNDTKT
SSTP_0001268400.1	9	1380	1388	2.08	AQPKPSNDP
SSTP_0001268400.1	9	1777	1785	1.63467	TTENPSNNI
SSTP_0001268400.1	11	884	894	1.67382	QKNPNPNVNDY
SSTP_0001268400.1	13	2212	2224	2.04385	TTTTPTPTTTKSS
SSTP_0001270500.1	12	79	90	1.75983	GDKGDEEELGTA
SSTP_0000522900.1	10	217	226	1.45	QEGNNKDHKK
SSTP_0000522900.1	9	405	413	1.87467	SSNGGGRPQ
SSTP_0000522900.1	9	1387	1395	1.59189	KISTSSPSP
SSTP_0000522900.1	9	1453	1461	1.95656	SEDDDSDIE
SSTP_0000522900.1	14	565 (in full prot)	578 (in full prot)	1.76921	LRPPSESPFPSTVG

## Sheet: ES_bcepred
S. stercoralis orthologues of S. ratti E/S proteome predicted to contain epitopes by bcepred	Epitope length (aa)	Start position in protein	End position in protein	Average bcepred score (threshold 2.38)	Epitope sequence
SSTP_0001036300.1	21	1120	1140	3.23546	QKEKERERKKRKKEKRRKDKQ
SSTP_0000367900.1	12	409	420	3.15638	SKKKKEKKKEKK
SSTP_0000412300.1	20	219	238	3.06593	KAEKKEDKKPEKKEEDKKSE
SSTP_0001172900.1	10	237	246	3.06502	KEDEEKKEKK
SSTP_0000020900.1	9	237	245	3.04778	KDDEKKEKK
SSTP_0000040200.1	23	599	621	3.00665	KDKSEKEDKKETKKKDKKAEEKK
SSTP_0000938600.1	31	1115	1145	2.95673	QREKEEKGEKEEKGEKEEKGEKEEKEEKEVK
SSTP_0000750000.2	14	12	25	2.91675	KSKKDDKKEKKVDK
SSTP_0001041900.3	11	1556	1566	2.90707	KKKKQEEEDKK
SSTP_0000504600.1	25	315	339	2.89875	EESKKEEKDGEKKEGEEKEDSEKPK
SSTP_0001088500.1	9	1001	1009	2.88964	KEKKRNEEE
SSTP_0000419800.1	12	17	28	2.87744	KNKKKKNNKNNK
SSTP_0000940500.1	10	643	652	2.87692	SEEKKEEPKK
SSTP_0000037000.1	19	691	709	2.87596	KAEEEKNEKEKKTEGEKDS
SSTP_0000649300.1	10	266	275	2.85585	SEKESEEKED
SSTP_0000036400.1	9	1421	1429	2.84675	ENDKKNKDG
SSTP_0000967200.1	17	151	167	2.83918	NKSEENNEEKEKEEKGE
SSTP_0000255500.1	9	455	463	2.81672	ESKEEEDED
SSTP_0000942500.1	12	431	442	2.81125	HEGEEKEKEEGE
SSTP_0000188700.1	16	340	355	2.81119	ENEDNDKTKETRKKKK
SSTP_0000767500.1	16	167	182	2.81009	DESDDSKKENKNEKEK
SSTP_0000624400.1	11	2	12	2.80932	TSDKKESKSKQ
SSTP_0000522900.1	9	6652	6660	2.80661	MKKERERGR
SSTP_0000967200.1	18	347	364	2.80512	YDDETKEKDDSNREEEES
SSTP_0001091500.1	15	26	40	2.80013	DSKDKDNSSEEKRGR
SSTP_0000255500.1	11	469	479	2.79443	DEDEAKEKDEE
SSTP_0000718700.1	9	290	298	2.78628	NNEKESKKE
SSTP_0001245200.2	10	188	197	2.78273	DDKKSKDEKQ
SSTP_0000126700.1	12	508	519	2.78079	EREKDDGDDNKD
SSTP_0000394200.1	10	22	31	2.77645	GDKKGKRKTR
SSTP_0000649300.1	14	142	155	2.77529	SEQENEEKEEEDND
SSTP_0000649300.1	12	205	216	2.77396	SEQESEEKEEED
SSTP_0001036300.1	10	958	967	2.76828	NKSKKNNKRK
SSTP_0000551100.1	19	614	632	2.76071	DSNNDKNDNNKKSKHKKSE
SSTP_0000967200.1	31	300	330	2.74048	SNKKSDEESKNTEEEEEDDDKTKSTEEDDDK
SSTP_0000013400.1	10	700	709	2.73515	KMDEDKKETS
SSTP_0001019300.1	12	368	379	2.72669	DNDSDNEEDEED
SSTP_0000649300.1	10	330	339	2.71767	NEEEKSDESE
SSTP_0000504600.1	9	780	788	2.71236	EDEKEQPKD
SSTP_0000718700.1	16	304	319	2.71134	DNEKDTESDESKDEDS
SSTP_0000020900.1	9	221	229	2.71039	SDDEDDTKK
SSTP_0001172900.1	9	221	229	2.71039	SDDEDDTKK
SSTP_0000649300.1	11	105	115	2.70386	SEEKTKSEDES
SSTP_0000649300.1	9	227	235	2.68917	SNHKEEESK
SSTP_0001229200.1	9	372	380	2.68719	NNSDEEDDN
SSTP_0000649300.1	12	315	326	2.68685	EEDSKDNEEEND
SSTP_0001220700.1	11	194	204	2.68264	GEEDNDNDEDE
SSTP_0000480700.2	10	1501	1510	2.6791	IEEEEEEKAE
SSTP_0000387400.1	14	302	315	2.67464	ERTKEGTEKDEESN
SSTP_0000967200.1	9	216	224	2.66919	STEEEKESG
SSTP_0001088500.1	9	1221	1229	2.66003	KTKTDKDKE
SSTP_0001106300.1	13	22	34	2.63838	GEEKNDDGEKNEN
SSTP_0000989700.1	15	1058	1072	2.63818	SECDDERNDNEEDHK
SSTP_0000301000.1	10	1203	1212	2.6322	HEKKEKYDNK
SSTP_0000942500.1	14	408	421	2.61809	LDEKKSSESSEEKE
SSTP_0000818700.1	10	22	31	2.6137	GDKKGRRKAR
SSTP_0001257900.1	10	22	31	2.6137	GDKKGRRKAR
SSTP_0001265000.1	10	22	31	2.6137	GDKKGRRKAR
SSTP_0001041900.3	21	1672	1692	2.60482	KREQEERDRLRREQEERDRLR
SSTP_0000521800.1	9	812	820	2.59181	NRKKSSNSK
SSTP_0000030100.1	9	212	220	2.57389	GDTQREEDN
SSTP_0000934100.1	11	1271	1281	2.55805	AREKAEREKAE

## Sheet: ES_Overlapping_epitopes
S. stercoralis E/S orthologuos proteins containing predicted epitopes from both tools	BepiPred 1.0	BepiPred start residue in protein	BepiPred end residue in protein	Bepi epitope length	bce	bce start residue in protein	bce end residue in protein	bce epitope length	Overlapping sequence (if present)	Overlap start residue in protein	Overlap end residue in protein	Overlap length
SSTP_0000013400.1	TEKGETVEGS	661	670	10	KMDEDKKETS	700	709	10	KMDEDKKETS	700	709	10
SSTP_0000013400.1	SETVKDTQEGGEEKMDEDKKETSNDNETPKAH	687	718	32
SSTP_0000020900.1	KEVSDDEDDTKKEGDVEDVKDDEKK	218	242	25	SDDEDDTKK	221	229	9	SDDEDDTKK	221	229	9
SSTP_0000020900.1					KDDEKKEKK	237	245	9	KDDEKK	237	242	6
SSTP_0000030100.1	KAGDKRPHGG	57	66	10	GDTQREEDN	212	220	9	GDTQREEDN	212	220	9
SSTP_0000030100.1	DGGTKNDEEEKA	118	129	12
SSTP_0000030100.1	REGDTQREEDNDNDNNWE	210	227	18
SSTP_0000036400.1	NEPTGSGEI	733	741	9	ENDKKNKDG	1421	1429	9	ENDKKNKDG	1421	1429	9
SSTP_0000036400.1	VDPGCTDPGI	1362	1371	10
SSTP_0000036400.1	TKDIENDKKNKDG	1417	1429	13
SSTP_0000037000.1	KKKAEEEKNEKEKKTEGEKDSESKIT	689	714	26	KAEEEKNEKEKKTEGEKDS	691	709	19	KAEEEKNEKEKKTEGEKDS	691	709	19
SSTP_0000040200.1	TNPNYKPPSD	126	135	10	KDKSEKEDKKETKKKDKKAEEKK	599	621	23	DKSEKEDKKETKKKDKKAEE	600	619	20
SSTP_0000040200.1	KYPMDPEKYDG	442	452	11
SSTP_0000040200.1	SSPPPKHQK	476	484	9
SSTP_0000040200.1	TTNDPPTGY	547	555	9
SSTP_0000040200.1	DKSEKEDKKETKKKDKKAEE	600	619	20
SSTP_0000126700.1	LTPPEEIYDPNDKKPSDWD	247	265	19	EREKDDGDDNKD	508	519	12	EREKDDGDDNKD	508	519	12
SSTP_0000126700.1	ATKPEDWDESQPE	275	287	13
SSTP_0000126700.1	IPNPESEKPKDWDDE	308	322	15
SSTP_0000126700.1	EREKDDGDDNKDEEQLSGSSEE	508	529	22
SSTP_0000126700.1	QGGENQDEDDSQKEE	546	560	15
SSTP_0000126700.1	DVATESPKE	570	578	9
SSTP_0000188700.1	NEDNDKTKET	341	350	10	ENEDNDKTKETRKKKK	340	355	16	NEDNDKTKET	341	350	10
SSTP_0000255500.1	IKDPDAKKPEDWD	282	294	13	ESKEEEDED	455	463	9	ESKEEEDED	455	463	9
SSTP_0000255500.1	YIDDPEDTKPDDWEKPEHIPDPDAKKPEDWDDEMDGDWEPPMI	298	340	43	DEDEAKEKDEE	469	479	11	DEDEAKEKDEE	469	479	11
SSTP_0000255500.1	ADKAESKEEEDEDKADAKDEDEAKEKDEEEGH	451	482	32
SSTP_0000387400.1	EERTKEGTEKDEESNN	301	316	16	ERTKEGTEKDEESN	302	315	14	ERTKEGTEKDEESN	302	315	14
SSTP_0000394200.1	VRPGDKKGKR	19	28	10	GDKKGKRKTR	22	31	10	GDKKGKR	22	28	7
SSTP_0000412300.1	AEKKEDKKPEKKEEDKKS	220	237	18	KAEKKEDKKPEKKEEDKKSE	219	238	20	AEKKEDKKPEKKEEDKKS	220	237	18
SSTP_0000412300.1	VPQPEAEPEAP	247	257	11
SSTP_0000480700.2	DNPSDNKKY	795	803	9	IEEEEEEKAE	1501	1510	10	IEEEEEEKAE	1501	1510	10
SSTP_0000480700.2	DEDDIEEEEEEKAE	1497	1510	14
SSTP_0000480700.2	NQSNEKEEKTPTQGD	2346	2360	15
SSTP_0000504600.1	SKGTDPETIQ	58	67	10	EESKKEEKDGEKKEGEEKEDSEKPK	315	339	25	EESKKEEKDGEKKEGEEKEDSEKPK	315	339	25
SSTP_0000504600.1	EPADETTTEESKKEEKDGEKKEGEEKEDSEKPKTK	307	341	35	EDEKEQPKD	780	788	9	DEKEQPKD	781	788	8
SSTP_0000504600.1	DEKEQPKDEEN	781	791	11
SSTP_0000521800.1	TMSSQTPKPS	160	169	10	NRKKSSNSK	812	820	9	NRKKSSNS	812	819	8
SSTP_0000521800.1	SPTNRKKSSNS	809	819	11
SSTP_0000522900.1	QEGNNKDHKK	217	226	10	MKKERERGR	6652	6660	9	NA	NA	NA	NA
SSTP_0000522900.1	SSNGGGRPQ	405	413	9
SSTP_0000522900.1	LRPPSESPFPSTVG	565	578	14
SSTP_0000522900.1	KISTSSPSP	1387	1395	9
SSTP_0000522900.1	SEDDDSDIE	1453	1461	9
SSTP_0000551100.1	GVGAPPVPGLDP	8	19	12	DSNNDKNDNNKKSKHKKSE	614	632	19	DSNNDKNDNNKK	614	625	12
SSTP_0000551100.1	DSNNDKNDNNKK	614	625	12
SSTP_0000551100.1	STTPTSNTTDNTSFPSPPSE	893	912	20
SSTP_0000551100.1	SISPTTPDT	958	966	9
SSTP_0000551100.1	SENSDKEKSPNTT	1052	1064	13
SSTP_0000649300.1	EEKTKSEDESSNNSKNVDKTEEDKSSKEYNNESSNDSEQENEEKEEEDND	106	155	50	SEEKTKSEDES	105	115	11	EEKTKSEDES	106	115	10
SSTP_0000649300.1	EDSTQEEEESE	162	172	11	SEQESEEKEEED	205	216	12	EEDSKDNEEEND	315	326	12
SSTP_0000649300.1	IENDNENDKNDDTT	182	195	14	EEDSKDNEEEND	315	326	12	NEEEKSDESE	330	339	10
SSTP_0000649300.1	SSNDSEQESEEKEEEDNG	201	218	18	SEKESEEKED	266	275	10	SNHKEEE	227	233	7
SSTP_0000649300.1	TEDSNHKEEE	224	233	10	NEEEKSDESE	330	339	10	SEKESEEKED	266	275	10
SSTP_0000649300.1	NDNESNKDDDTTEY	245	258	14	SNHKEEESK	227	235	9	SEQESEEKEEED	205	216	12
SSTP_0000649300.1	INDSEKESEEKED	263	275	13
SSTP_0000649300.1	TEDSTQEEEESNNESGKKNDSEEYS	283	307	25
SSTP_0000649300.1	ELEEDSKDNEEENDNSTNEEEKSDESESTESEQISDEKSENDISSNEDAE	313	362	50	SEQENEEKEEEDND	142	155	14	SEQENEEKEEEDND	142	155	14
SSTP_0000718700.1	DGSDEPGTSAC	65	75	11	NNEKESKKE	290	298	9	NNEKESKKE	290	298	9
SSTP_0000718700.1	SDGNKEVTD	243	251	9	DNEKDTESDESKDEDS	304	319	16	DNEKDTESDESKDEDS	304	319	16
SSTP_0000718700.1	NNEKESKKEGENGHDNEKDTESDESKDEDSEHKVETEDDEVGQKPEYD	290	337	48
SSTP_0000750000.2	SGSSKSKKDDKKEK	8	21	14	KSKKDDKKEKKVDK	12	25	14	KSKKDDKKEK	12	21	10
SSTP_0000750000.2	PSSKEKVQKQEDESPK	723	738	16
SSTP_0000750000.2	NDTTDNDKTTI	2357	2367	11
SSTP_0000767500.1	DEDESDDEDPFG	114	125	12	DESDDSKKENKNEKEK	167	182	16	DESDDSKKENKNEKEK	167	182	16
SSTP_0000767500.1	GGEDGMDDDDEEL	148	160	13
SSTP_0000767500.1	VDESDDSKKENKNEKEKGPEEVPN	166	189	24
SSTP_0000818700.1	VRPGDKKGR	19	27	9	GDKKGRRKAR	22	31	10	GDKKGR	22	27	6
SSTP_0000934100.1	VTKPDTEKP	395	403	9	AREKAEREKAE	1271	1281	11
SSTP_0000934100.1	ASGEEAEKEDGEV	769	781	13
SSTP_0000934100.1	ISPESDSSEPTEE	785	797	13
SSTP_0000934100.1	DGKTPSRGSRN	1016	1026	11
SSTP_0000934100.1	TAARGPNSEG	1044	1053	10
SSTP_0000934100.1	SEQQTEEESEEH	1210	1221	12
SSTP_0000934100.1	MEQQPQASEVQNDESPQKPPNDF	1226	1248	23
SSTP_0000934100.1	QGQPQQPQQPQQPQYPQQPQQPQHPQQPQRT	1311	1341	31
SSTP_0000938600.1	TIPTQEDSVP	553	562	10	QREKEEKGEKEEKGEKEEKGEKEEKEEKEVK	1115	1145	31	REKEEKGEKEEKGEKEEKGEKEEKEEKEV	1116	1144	29
SSTP_0000938600.1	DDNSNPKID	687	695	9
SSTP_0000938600.1	REKEEKGEKEEKGEKEEKGEKEEKEEKEV	1116	1144	29
SSTP_0000938600.1	QFKDEGEKD	1156	1164	9
SSTP_0000938600.1	PAEGEGKEIATT	1386	1397	12
SSTP_0000938600.1	TKSESTAEEATPTTTTTT	1420	1437	18
SSTP_0000938600.1	EPKGTDENVPSQT	1502	1514	13
SSTP_0000938600.1	GEGQTTENNDNVPEG	1847	1861	15
SSTP_0000938600.1	PRYGHPPPPHQTSPM	1920	1934	15
SSTP_0000940500.1	ASSSGSEEKKEEPKKEEK	638	655	18	SEEKKEEPKK	643	652	10	SEEKKEEPKK	643	652	10
SSTP_0000942500.1	DEGDENETAE	396	405	10	LDEKKSSESSEEKE	408	421	14	KKSSESSEEKE	411	421	11
SSTP_0000942500.1	KKSSESSEEKENH	411	423	13	HEGEEKEKEEGE	431	442	12	HEGEEKEKEEGE	431	442	12
SSTP_0000942500.1	EQEHEGEEKEKEEGEGENNNENKSSGEKGEESAS	428	461	34
SSTP_0000967200.1	ESIDDSENADKTEE	114	127	14	NKSEENNEEKEKEEKGE	151	167	17	NKSEENNEEKEKEEKGE	151	167	17
SSTP_0000967200.1	SNKSEENNEEKEKEEKGEDNESIEDESGKEDDNEEY	150	185	36	STEEEKESG	216	224	9	STEEEKESG	216	224	9
SSTP_0000967200.1	ESESTEEEENDS	196	207	12	SNKKSDEESKNTEEEEEDDDKTKSTEEDDDK	300	330	31	SNKKSDEESKNTEEEEEDDDKTKSTEEDDDK	300	330	31
SSTP_0000967200.1	EENSTEEEKESGDNESMEKENGKENDNEEYS	213	243	31	YDDETKEKDDSNREEEES	347	364	18	YDDETKEKDDSNREEEES	347	364	18
SSTP_0000967200.1	SESTEEEEH	254	262	9
SSTP_0000967200.1	ENSTQEEEGSEENNNESGRNDDTNEYSNESNKKSDEESKNTEEEEEDDDKTKSTEEDDDKIKSTEEDSTYEDEENEYDDETKEKDDSNREEEESEDDIS	271	369	99
SSTP_0000989700.1	HTDNNTKEEEKET	303	315	13	SECDDERNDNEEDHK	1058	1072	15	SECDDERNDNEEDHK	1058	1072	15
SSTP_0000989700.1	EEEVNEDPD	392	400	9
SSTP_0000989700.1	DDESECDDERNDNEEDHKNE	1055	1074	20
SSTP_0001019300.1	SQVPDKEEDI	320	329	10	DNDSDNEEDEED	368	379	12	DNDSDNEEDEED	368	379	12
SSTP_0001019300.1	DNDSDNEEDEEDDD	368	381	14
SSTP_0001036300.1	NSPFPESQDGKNS	22	34	13	NKSKKNNKRK	958	967	10
SSTP_0001036300.1	SPIEPSTNLTPDDSGN	114	129	16	QKEKERERKKRKKEKRRKDKQ	1120	1140	21
SSTP_0001036300.1	SPGSTDDSL	207	215	9
SSTP_0001036300.1	NDENDKNKN	980	988	9
SSTP_0001036300.1	NETSEDESDSDN	1000	1011	12
SSTP_0001036300.1	TSDEDVSDGSDVNSDSNSDTDDSSADNNEGSNSENDEHEKEDD	1037	1079	43
SSTP_0001041900.3	MKPPEPDHSS	1186	1195	10	KKKKQEEEDKK	1556	1566	11
SSTP_0001041900.3	HVDDDGTRT	3622	3630	9	KREQEERDRLRREQEERDRLR	1672	1692	21
SSTP_0001088500.1	MENPNEKDP	1	9	9	KEKKRNEEE	1001	1009	9
SSTP_0001088500.1	EQAEADGEDEAK	367	378	12	KTKTDKDKE	1221	1229	9
SSTP_0001088500.1	FEKPKPPKGKQ	560	570	11
SSTP_0001088500.1	KEGGGGGKKKG	634	644	11
SSTP_0001091500.1	DSKDKDNSSEEKRGRKRPQT	26	45	20	DSKDKDNSSEEKRGR	26	40	15	DSKDKDNSSEEKRGR	26	40	15
SSTP_0001091500.1	KPTNSPVYTPKPTNRPTYETTTSTSTTTT	373	401	29
SSTP_0001091500.1	PAQKVETTPAPT	548	559	12
SSTP_0001091500.1	TLPSPTPEKV	695	704	10
SSTP_0001091500.1	QRTTPSPTV	768	776	9
SSTP_0001091500.1	APACGGSGPTEFTP	984	997	14
SSTP_0001106300.1	SNNNGEEKNDDGEKNENDNTS	18	38	21	GEEKNDDGEKNEN	22	34	13	GEEKNDDGEKNEN	22	34	13
SSTP_0001172900.1	KEVSDDEDDTKKEGDVEDVKEDEEKK	218	243	26	SDDEDDTKK	221	229	9	SDDEDDTKK	221	229	9
SSTP_0001172900.1	NA				KEDEEKKEKK	237	246	10	KEDEEKK	237	243	7
SSTP_0001220700.1	SENGEEDNDNDEDED	191	205	15	GEEDNDNDEDE	194	204	11	GEEDNDNDEDE	194	204	11
SSTP_0001229200.1	EDDSKVPDKEED	317	328	12	NNSDEEDDN	372	380	9	NNSDEEDDN	372	380	9
SSTP_0001229200.1	GNDENNSDEEDDNDDN	368	383	16
SSTP_0001245200.2	SKSSPPYSKK	239	248	10	DDKKSKDEKQ	188	197	10
SSTP_0001245200.2	TRSPSPEWR	788	796	9
SSTP_0001257900.1	VRPGDKKGR	19	27	9	GDKKGRRKAR	22	31	10	GDKKGR	22	27	6
SSTP_0001265000.1	VRPGDKKGR	19	27	9	GDKKGRRKAR	22	31	10	GDKKGR	22	27	6

## Sheet: DE_BepiPred
S. stercoralis DE proteins predicted to contain epitopes by BepiPred (n = 78)	Average epitope score for the sequence (individual residue threshold 1.3)	Epitope sequence length	Predicted epitope sequence (n = 125)
SSTP_0000032300.1	1.88024	37	TTTTTTTTTTASTTTTPTTTSTTPTTTPAPTTKNGKK
SSTP_0000165100.1	1.67662	34	QEESSEGDSTSDEDISTSDSSLDDGEVSDSSEDL
SSTP_0000270800.1	2.6192	45	PKPKTTTQAPEEPEGPEEPEGPEEPEGPEGPRDNDDDVDEEDERD
SSTP_0000289100.1	1.95644	27	KPPYCKPPPCKPIPPPTCEPVPPPTCE
SSTP_0000289100.1	2.43024	33	LKPSKPSKPPKPSTPQKPSTPQKPKTTPKGTTT
SSTP_0000306900.2	1.8541	51	NRQGGPNAGQPGNKDMDNRVPGATEGKGNMGPNGPQNNMNGQGGNGANPNS
SSTP_0000306900.2	2.08716	31	KIPEGPPNGGGGSMNPQGNGNMGPGANQKPG
SSTP_0000306900.2	2.63774	23	KGIPSGQPGPGAPPNPGQGPGNR
SSTP_0000306900.2	2.38847	17	GQMPNGPNAGPPNGQPN
SSTP_0000385700.1	1.34942	113	QDSNGLKKDAEANSAGAQAANSAGAQAANSAGAQAANSAGAQAANSAGAQAANSAGAQAANSAGAQAANSAGAQAANSAGAQAANSAGAQASDENKHKSSKDSGDRVSNGASR
SSTP_0000405700.1	2.08963	30	CPPGPPGLPGRPGENGVPGMRGPPGEDSRT
SSTP_0000405700.1	2.48936	128	PGPQGLEGPAGEAGPAGSDGQPGVPGPPGKTGIPGAPGPQGDPGRPGEPGIPGKEGAPGSNGTRGRGKPGVRGPNGPPGQPGNNGADGNPGTPGQPGREGPPGQAGNPGSPGSDGQPGRPGVPGQPGI
SSTP_0000482966.1	1.61923	22	QANDDYWEKKDKENKTTKSPGP
SSTP_0000503100.1	1.86211	28	ETTEQPAEEELPQDSSNSSDDNSDNVEK
SSTP_0000503100.1	1.7352	35	EKSEEQSEEQSEEKEQSSSTTTTTTTASTTSKTTT
SSTP_0000503100.1	1.90636	14	ELPTEEDDNDSAED
SSTP_0000503100.1	1.93912	26	TEPPTEDELPQDSSNSSDDNSDNVEK
SSTP_0000503100.1	1.82272	43	EKSEEQSEEEPEEKEQSSSTTTTTTTTTSSTTSTTTTTTASTT
SSTP_0000503100.1	1.87503	79	ELPQKSSNSPDNNSDDVEINEEPTTPSERLPEKSEEEPEKEPEEEPEKEAQSSSTTTTTTTTTSSTTSTTTTTTATTTK
SSTP_0000503100.1	1.91043	14	TTTGKPKSESKKNK
SSTP_0000503100.1	1.75961	51	SNSPDNNSNNVETNEESATPSEPLPEEPAVESKEESVEEPVEEAKSSSTTT
SSTP_0000504000.1	2.45982	94	LPSKPTASPSKPSTSPPSTSPPSTTKKPGNPGNGGKPSNGGKPSKPGKPGKPSKPGNSGSPGKPGKPANPGSSRKPRKPKKPASPGKAGKSRRS
SSTP_0000504200.1	2.51066	50	VKPGNPGGPGKPGNSNGSNNPGNSGGTKKPPQTTKPSKPKPSKPSKPSRP
SSTP_0000506600.1	2.25884	19	KKNEEEVPKDPPGSEEDKN
SSTP_0000506600.1	1.90344	18	EEKEKVTPKNPDKAEEND
SSTP_0000506700.1	1.88908	26	KKEEKDSKEKDSKEKNSKEKDKSNED
SSTP_0000506800.1	1.73087	23	KKNEKEGLEDPADSEEDKKAKKD
SSTP_0000506900.3	2.13644	9	PQGPPPLPP
SSTP_0000506900.3	2.63245	22	RGPPPPRLPPPPGLPPPPRGGG
SSTP_0000506900.3	2.21805	22	KKNEKDPSDGKGSNEDKGSEEN
SSTP_0000507300.1	1.84153	19	KASNSSKSDGNSKDEKKNE
SSTP_0000507300.1	2.22579	29	SFENSPNSPNTPTSPNSSNSSNSPEPSLE
SSTP_0000509500.1	2.09565	17	KEKEKVPPENPDDAKEN
SSTP_0000538100.1	1.6857	30	RSPKKDKKSKSTKKKEKNEQVEEPAGNGDQ
SSTP_0000538100.1	1.78012	16	GPNGGGFGGPNGGGFY
SSTP_0000538500.1	1.94578	18	NDDTSSQKNNNNTPDKPL
SSTP_0000623900.1	1.7285	16	KSNNNKNNENNSNKPS
SSTP_0000644100.1	1.57325	20	PNKGYGNQQNNPKVEKPYYN
SSTP_0000644100.1	2.202	651	KPSTEKVTKPTKSTKPSTEKPTKPTKPSTEKSTKPSTEKPTKPTKPSTEKPTKPTKPSKPSTEKPTKPSTEKPTKPTKPAKPTKPTKPTELTKPNTEKPTKPTKPTKPTKPSTEKPTKPSTGRPTKPTKPTKPTKPSIENSTKPSTEKPTKPGTEKPTKPTKPTKPTRPTKPTKPTKPNTEKPTKPTKPSTERPTKPTKPTNPNTEKPTKPTKPTKPSTEKPTKPTKPNTEKPTKPSTEKLTKPTRPTKPTRPTKPSKPSTEKQTKPSTKKPTKPTKPTKPTKPNTEKPTKPTKPTKPSTEKPTKPSTEKPTKPTRPTKPTKPSTEKSTKPSTEKPTKPNTEKPTKPTKPSTEKLTKPTKPTKPSTEKPIKPSTEKPTRPTRPTKPSTEKPTKPSTEKP…
SSTP_0000666500.1	1.69996	26	EEEPEAERGRDRDGVPEVRGPDRGEV
SSTP_0000671200.1	1.77186	14	VRTTEKPKNSDEQT
SSTP_0000671200.1	1.72045	20	QETNKANQPDATQKAEPAAV
SSTP_0000671400.1	2.41456	16	RGPPRRPPPPRSDEVE
SSTP_0000674400.1	1.63113	15	EKNSQTTTESTTSTS
SSTP_0000674400.1	2.16743	23	EEERERNPDDPRNERQPPDEARN
SSTP_0000676900.1	1.5799	21	SSSESGSSEVKPPVPVKQEKS
SSTP_0000677000.1	1.96661	18	GKSVETNEQPESSPKPSL
SSTP_0000677200.1	2.48645	11	PPLPPPEDDDG
SSTP_0000677200.1	2.02081	16	ERPPRPPPLSEEDDKK
SSTP_0000677300.1	2.11535	23	GPPPLPPPSAEYEYGEDDEDTAE
SSTP_0000677300.1	1.93495	19	GPSRRRPQSPRGQQRPQRR
SSTP_0000677300.1	2.16752	25	RGPPPRPPLPEPEEDEYEYEDEDDV
SSTP_0000677500.1	2.05025	16	NTSPKEGGADPQQAEK
SSTP_0000677600.1	1.7145	20	PSTVKTAQPEGADPLQDPEA
SSTP_0000677800.1	1.93903	36	PSTTNTSPTQASTNPVQAQKPGKGGPTQTGSGKTGR
SSTP_0000677900.2	2.27158	48	AIPSTTNTSPTQASTNPAQAQKPGKGGPGNTGPGNTGPGNTGPGNTGP
SSTP_0000677900.2	1.84426	42	TIPSTTNTSPTQASTTPLQAQNAAKGGPGKTGPGKTGPENFD
SSTP_0000677900.2	2.11981	52	GVPGAGGPPGPGGVPGDAGVPGVGGPPGVNGVPGAADLPGPVGVPGPDDGKK
SSTP_0000700800.1	1.68955	20	SKKSKKSENSEKSENSEKSE
SSTP_0000700900.1	1.53305	20	SKKSKKSKKSKKSENSEKSE
SSTP_0000701400.1	1.68955	20	SKKSKKSENSEKSENSEKSE
SSTP_0000701700.1	2.22715	33	TRRRGPPQRSPPPRSPSPRSPPSRRGPLQRPQR
SSTP_0000701700.1	1.95347	15	YDDYEPYDDDNDDAY
SSTP_0000738500.1	1.95704	52	KAKKPSKKSGKPTTKPTTKTTTKTPTKKPNKKRPTTTKRPTTTKGPTTTKGS
SSTP_0000795700.1	2.05368	428	QACPPGPPGPDGIPGSDGEPGLPGNDGTPGEAGMSSSSYKTGNECPPCPAGPPGPPGPDGPPGPNGPDGQPGNDGGPGNPGQNGPPGPPGPPGPPGNPGQDGQPGAPGNPGTKTIPVPGPPGPPGPPGGDGQPGGDGQPGGPGESGPPGPAGPPGGPGNPGTDGAPGQPGMAGQPGGDAEYCPCPPRTGAVSAAGGGGYGGSAGGAAGGAAGGMGAAGAGGSNGGGYGGSAGGMGSAAAGGSNGGGYGGSAGGMGSAAAGGSSGGYASKSAAPAAASAGGYEGSAGGGMASAAAGGSGGGYASKSAAPATASAGGYGGSAGGGMASAASAGGSGGGYASKSAAPAAASAGGYGGSAGGGMASAAAGGSGGGYASKSAAPAAAAAGGYGGSAGGGMASAA…
SSTP_0000808800.1	1.75384	25	QKNQKDQKNQKDQKNQKDQKNQKDQ
SSTP_0000811600.1	2.25198	143	IRKPGPKKPIKKPIRKPGPKKPIKKPIKKPGPKRPIKIKPGPKPIKPTVKPAPKTTTAAPEEPEEPEEPEDPEEPEEPEEPEDPEEPEDPEEPEESEEPEEPEESEELEEPEESEELEEPEESEEPEEPRDNDDGVDEEDERE
SSTP_0000828100.1	1.61416	70	NKTEENKEKGMEEKEKEKEKKKEKKKEKKKEKEKKKEKEKKKEKDSKKKSTKKEKKKEKKEENEENTTPT
SSTP_0000828100.1	1.82711	53	PKSNPGTNIHPIPQPGPNQNSSLPPQPIPDTNSTTSTNSTSQNNNIPNGNSNG
SSTP_0000828100.1	1.83204	25	GEGNDHSQDYEGDYKEKEEEESDEE
SSTP_0000828400.1	1.87317	18	TPQGNNANSGANDDDYYD
SSTP_0000844200.1	1.49512	34	DEDSSEGDLTSDENISNSDSSLDDGEVSDSSEDL
SSTP_0000844200.1	1.77967	12	SNEDSSEEDSIS
SSTP_0000844200.1	2.00665	17	DEDSSEGDSTSDEDISN
SSTP_0000844200.1	1.77029	24	QEESSEGDSTSDEDISTSDSSLDD
SSTP_0000847900.1	2.33933	82	GRPTQKPNNKKTTIKPKPKPKPTPTKPKPKPTPTKPKPKPTTTKPKPKPTTTRPKPTVTKPKPTQPPTTTATKPKPPTTTTT
SSTP_0000848000.1	1.99418	62	NNNSKNKKPIKGPTKKPNNKKTTIKPKPKPTTTKPKPKPTTTKSKPTVTKPKPTQPPTTTTE
SSTP_0000852400.1	2.43649	75	GKPTQKPKPKPTQKPKPKPSQKPKPKPNATKPKPKPTTTKPKPKPTTTKPKPKPITTKPEPKPTTTNPKPTTTTT
SSTP_0000852500.1	2.91033	81	KKPNNKPKPPGLRPKPPSPRPKPPGPRPKPPSPRPKPPSPRPKPPSPRPKPPSPKPKPPGPKPIPPAPKPKPTQPPKTTTR
SSTP_0000859300.1	1.82889	143	DSEGDESEEKPFAGSDGYDVEDGQDEHDGSDSVEHDGSDSVEHDSDSHDEDSHDSDGLDEDGHDGDGSDSDEHDGDGQDGDSLVEHDGPDSVEHDGSDSVEHDGSDSVEHDGDSLDEDGLDGDSHDGDDYDGDSDGDSDDDSE
SSTP_0000863600.1	2.01813	15	GTSPPPPMRSGGGRQ
SSTP_0000863700.1	2.55416	50	TTQPRPPSSTASPSGPPATSSPGSTAGPGKPGNNTSPGNPGTPGKPGGAS
SSTP_0000877500.1	2.97702	178	KPGPPGPGGKPGKPGKPGKPGAPGAPGTPGKAAAAPCEPATPPPCQPCPPGPPGPPGPPGPAGDGGSPGEPGSPGPDGQAGTEGPPGPPGPPGNDGQPGAPGQPGPDGESQYPEAGEPGPPGPPGPPGNPGGPGKPGSDGIPGPAGPKGPPGPPGPPGSDGNPGSPGQPGEAGSPGEK
SSTP_0000940000.2	1.68737	35	DKKSKKEKKKEKKEKKGKGKGKEKDSKSTTKDPLE
SSTP_0000940000.2	1.7653	30	ETEKNSKKSKGTKGKKNKSDSKNTPSKDSF
SSTP_0000940000.2	1.56908	26	EENESKSEKEKAKKKEKKSKKSDSKS
SSTP_0000940000.2	1.78165	23	LSTPKQNPKENKQKSKNKKSNNE
SSTP_0000940000.2	1.73306	31	STFSEQNPEENKKKNNDKKNKKDNEKKSKST
SSTP_0000940000.2	1.63462	26	GNDNKKKGKDKKKKGKNSKSEDVTTT
SSTP_0000940000.2	1.76938	21	QNPEKNKKKDKEKKNKKESGK
SSTP_0000940000.2	1.71108	24	PFPEENDSKKKGKDKKKKGKNSKS
SSTP_0000940000.2	1.76388	59	DTSNEDDQKENDKKKKKGKKEKKEKEKEGEKEKEKKEKKGKKGKKGKKDKSATTEDPFA
SSTP_0000940000.2	1.91789	56	GAGGAGGMAGNGDSDNEIPGGPGGPNRRDGNGDFDDSDEDDNDNRITNPNGNNSTG
SSTP_0000940000.2	1.87139	18	TNSGSTNNTQSQNPPTRR
SSTP_0000946400.1	2.02332	41	ERQTTTTPTTTTPTTTTATTTTPTTTPTTTPTTKAPSGSGR
SSTP_0000946500.1	2.22884	80	ERQTTTATQTTTTPTTTTATTTTPTTTPTTKAPAVPGVPGGPGVPGGPGVPGGPGVPGGPGVPGGPGVPGGPGVPGGPGP
SSTP_0000946600.1	1.95653	76	ERQTTTTSQTTTTTTASTTSITSQPTGPGQPAASGQPAASGQPAASGQPAASGQPAAGGKPAASGKPAAGGKPGSG
SSTP_0000946700.1	1.65932	40	TTTTTQTTTTTTASTATTPTTTATTASTAAPTTPKKTGKK
SSTP_0001008500.1	1.94055	31	RPGPTAKPSIRTPSPPKITGRPAPRPPSNRI
SSTP_0001008600.1	1.83895	56	TTPRPNKPVRPVSKTTRRPQPPKPNPRPSSRIPPKPVKPATQSTTKPVVTQKPPNN
SSTP_0001008700.1	1.73396	23	RPSRPRPSSRIPPKTVKPGTKST
SSTP_0001008900.1	1.60719	26	NAPGKKPLNSKTTPRSQKPVRPASKS
SSTP_0001008900.1	1.60724	25	KTPKTTKRPVKPTRKTPKTTKRPVK
SSTP_0001019700.1	2.01748	25	DCEDDDDDGYDGDDGYDSYDGGAGG
SSTP_0001040300.1	2.63204	90	QRQTTTTTTTTTTTTSTTTSTTAKPAGPGQPSGPGQPAGPGQPSGPGQPSGPGQPSGPGQPSGPGQPSGPGQPSGPGQPSGPGNPGSGRK
SSTP_0001040400.1	2.77498	42	TPTTTSATTKAPSGSGQPGPPGPPGPPGPPGPPGVAGPPGPP
SSTP_0001040400.1	1.86116	37	RQTTTTTTTTATTPTTTTPTTTTPTTTPTTTKAPGIP
SSTP_0001040500.1	1.81147	36	ERQTTTTTQTTTTPTTTTPTTTTTATTSTAKPTGGK
SSTP_0001040600.1	2.11762	32	ERQTTTTTTPTTTTPTTTTPTTTTPTTTPGGK
SSTP_0001040700.1	1.8173	46	ERQTTTTTTTTTTTATTPTTTTPTTTTPTTTTTATTKATPANPGRK
SSTP_0001103800.1	1.61748	48	KKPVKPAPKPIKPTPKPIKTTPKSIKTTPKPIKTTPKPIKTTTKTPVT
SSTP_0001103800.1	1.76876	72	EYDDEYSDEHDGEYSDEHDGEYDGEYDGEYDGEYDGEYDGEYDGEYDGEYDYEYSNEEDNSNEDDSDENDSN
SSTP_0001127300.1	1.73648	73	TSTQTPTTTTTTATTTTSTESPTTTTTTATTTTSTESPTTTTTTATTTTSTQTPTTTTTTVTTTTSTESPTTT
SSTP_0001127400.1	1.721	39	TSTESPTTTTTTVTTTTSTESPTTTTTTATTTTSTESPT
SSTP_0001129300.1	1.82362	45	ATTSTSTESPTTTASTTTSTKSPTTTTTTATTSTSTESPTTTTTT
SSTP_0001131100.1	1.86411	57	SSEHSVEEGNSEQNSEENQLESASGSSEDDKDNSSNTNDSNDNEKTSQNSGEDNDNE
SSTP_0001131100.1	1.88716	25	KKEKSSSGSSSSEEEPKKKSKKSKN
SSTP_0001131100.1	1.79554	46	KDKKTDSKKKSKSEDKSESKKESKKKEESDSKKKSKKDKESDSGKE
SSTP_0001131200.1	1.69981	16	KKHESSSSSEEDKKKS
SSTP_0001147700.1	1.69032	19	DDSSNQSVQSSEESNGNQE
SSTP_0001211500.1	1.71059	27	TNGYGSTNGGYGSGSTNGGYGQSQQTP
SSTP_0001213100.1	1.78606	31	LPSPTNTPSSTTTSTTSTTTSTTTTTTSTTS
SSTP_0001222000.1	2.38854	13	PSSKPKPTPKPKP
SSTP_0001226800.1	1.90433	58	KRPGQKGPIRKPGPKRPIRKPGPKRPIRKPGPKRPIKKPGPRRPGPKKPIRKPGPKKP
SSTP_0001226800.1	2.92283	93	PKPKTTTQAPEEPEGPEEPEGPEEPEGPEGPEEPEGPEEPEGPEEPEGPAGPEEPEGPAGPEEPEGPEEPEGPAGPEEPRDDDDGVDEEDERD

## Sheet: DE_bcepred
S. stercoralis DE proteins predicted to contain epitopes by bcepred (n = 62)	Average epitope score for the sequence (individual residue threshold 2.38)	Epitope length	Predicted epitope sequence (n= 108)
SSTP_0000032300.1	2.42856	22	RERRERRIRQREQQSRRAERAK
SSTP_0000037300.1	2.82072	26	EKRRTRGRKQKKSKKTKKSRKPKRQN
SSTP_0000165100.1	2.77691	8	PSDKKEES
SSTP_0000165100.1	2.42652	16	DNKDDSDSQEDLKNKD
SSTP_0000165100.1	2.4914	18	DDKNERSDEKVSDSESSQ
SSTP_0000165100.1	2.43565	12	NNNEDSSEEDST
SSTP_0000247300.1	2.69218	11	KEKGDSKEEQD
SSTP_0000367900.1	3.15638	12	SKKKKEKKKEKK
SSTP_0000386200.1	2.6025	10	ENKHKSSKDS
SSTP_0000386200.1	2.50182	10	KEHQKRQNND
SSTP_0000390500.1	2.81816	8	YDEKDRRE
SSTP_0000390700.1	2.95195	10	DRREKEKKTT
SSTP_0000390700.1	2.99455	15	YDEKDKKERERRKST
SSTP_0000481300.1	2.38523	14	KEIKEKIEENKDRH
SSTP_0000481700.1	2.38523	14	KEIKEKIEENKDRH
SSTP_0000482933.1	2.65563	12	WEKKDKENKTTK
SSTP_0000482966.1	2.66405	11	WEKKDKENKTT
SSTP_0000492900.1	2.64718	11	REAEAKRRRER
SSTP_0000492900.1	2.45003	28	RLENNKKTEKIRRELREKKKHRELEKRK
SSTP_0000493100.1	2.79719	12	IKKDKKSKKDKQ
SSTP_0000503100.1	2.50298	16	KNKKSKNHDDFKEKTS
SSTP_0000503100.1	2.54656	18	PEKSEEQSEEQSEEKEQS
SSTP_0000503100.1	2.56096	18	PEKSEEQSEEEPEEKEQS
SSTP_0000503100.1	2.57947	9	PKSKSNKNK
SSTP_0000503100.1	2.5005	22	LPEKSEEEPEKEPEEEPEKEAQ
SSTP_0000503100.1	2.67528	9	PKSESKKNK
SSTP_0000504200.1	2.63162	15	LKKRQRGRRRERGRR
SSTP_0000505500.1	2.40834	26	TRSEKRKKDVYTRGKKEKRDITKKKS
SSTP_0000505500.1	2.73737	15	VSKSHKKNNKKDKRP
SSTP_0000505800.1	2.64175	13	TTKKNKKKSKIRK
SSTP_0000506400.1	2.38563	22	TKRKQQARNRQKQRRQAQRSRQ
SSTP_0000506500.1	2.25722	22	SKRKQQARNRQKQQRQAQQSRQ
SSTP_0000506600.1	2.46025	20	RSSKKKQQARNRQKQRRRAQ
SSTP_0000506600.1	2.44751	23	LEKEKKKNEEEVPKDPPGSEEDK
SSTP_0000506600.1	2.36481	27	LRNSKRRQQARNRQKQRRQAQKSRQRQ
SSTP_0000506700.1	2.3874	18	TKRKQQARNRQKQRRQAQ
SSTP_0000506700.1	2.62761	9	ARERETERR
SSTP_0000506700.1	3.08116	27	KEEKKKEEKDSKEKDSKEKNSKEKDKS
SSTP_0000506800.1	2.83167	9	EEERKKNEK
SSTP_0000506800.1	2.6808	10	DSEEDKKAKK
SSTP_0000506900.3	2.80114	9	AHKRERERR
SSTP_0000506900.3	2.79065	10	RARERERERR
SSTP_0000506900.3	2.61436	23	EEERKKNEKDPSDGKGSNEDKGS
SSTP_0000507300.1	2.50902	16	SNSSKSDGNSKDEKKN
SSTP_0000509500.1	2.40473	24	RNSKRKQQARNRQKQRRQAQKSRQ
SSTP_0000530900.1	2.61111	11	SDKRQKRQAKK
SSTP_0000538000.1	2.6307	10	NKRSSSKSKK
SSTP_0000538000.1	2.87463	32	IRQRKEKLRELKRKQKEKRKRKREERRKREEE
SSTP_0000538100.1	2.89339	19	NKRSPKKDKKSKSTKKKEK
SSTP_0000538100.1	3.03106	31	IRQKKKESKEKKKKMKEKRKRKREERRKRYE
SSTP_0000666500.1	2.48707	11	KRQSKKLRRRS
SSTP_0000666500.1	2.969	10	REDERRERER
SSTP_0000666500.1	2.55593	21	GEEDERRIRDREEEPEAERGR
SSTP_0000671500.2	2.64203	8	ARKRDTQR
SSTP_0000674400.1	2.83002	13	RARRESERREQER
SSTP_0000674400.1	2.67175	15	REEEERERNPDDPRN
SSTP_0000677200.1	2.92202	16	RVKRRRKKGKKSKTKR
SSTP_0000677300.1	2.90555	10	RRKRERERQR
SSTP_0000677400.1	2.48317	13	EEQRKKAEAEEQK
SSTP_0000700800.1	2.90375	43	KPEKPKKSKKHRKSKRSKKHRKSKKSKKSKKSENSEKSENSEK
SSTP_0000701300.1	2.8964	39	PKKPKKPKKSKRSKKYRKSKKSKKSKKSKKSKKSENSEK
SSTP_0000701400.1	2.90375	43	KPEKPKKSKKHRKSKRSKKHRKSKKSKKSKKSENSEKSENSEK
SSTP_0000711400.1	2.79579	18	EKRRTRGRKQKKSKKQKR
SSTP_0000808800.1	2.66194	25	EQKNQKDQKNQKDQKNQKDQKNQKD
SSTP_0000811600.1	2.44121	41	EEPEEPEDPEEPEEPEEPEDPEEPEDPEEPEESEEPEEPEE
SSTP_0000811600.1	2.43191	20	EESEEPEEPRDNDDGVDEED
SSTP_0000828100.1	2.96463	14	PKEEKGKKEEKNEK
SSTP_0000828100.1	3.21283	63	KTEENKEKGMEEKEKEKEKKKEKKKEKKKEKEKKKEKEKKKEKDSKKKSTKKEKKKEKKEENE
SSTP_0000828100.1	2.87175	12	YKEKEEEESDEE
SSTP_0000828300.1	2.5275	23	SDERQKRQATKQKKQKKFRKGRG
SSTP_0000828400.1	2.57328	17	QRKRGKQQREKQRQQHK
SSTP_0000828400.1	2.59314	11	RQKKIREERER
SSTP_0000830700.1	2.50525	21	VKKRKNKKNLNKSTNKRKKVK
SSTP_0000830700.1	2.72919	13	RKSKARKEPKSKK
SSTP_0000863700.1	2.75745	15	RKGRKERQQRRRRQR
SSTP_0000940000.2	3.11924	31	DKKKDKKSKKEKKKEKKEKKGKGKGKEKDSK
SSTP_0000940000.2	3.26195	19	KKDEKNKKKEKKEKRKKSS
SSTP_0000940000.2	2.70079	21	ETEKNSKKSKGTKGKKNKSDS
SSTP_0000940000.2	3.01346	21	NESKSEKEKAKKKEKKSKKSD
SSTP_0000940000.2	2.71434	23	NPKENKQKSKNKKSNNEKDKKLE
SSTP_0000940000.2	3.01125	17	KEKSNEKKNKKENEKKS
SSTP_0000940000.2	3.11477	11	DSDKKKNKKKK
SSTP_0000940000.2	2.98263	21	PEENKKKNNDKKNKKDNEKKS
SSTP_0000940000.2	2.94814	18	NDNKKKGKDKKKKGKNSK
SSTP_0000940000.2	3.06918	20	NPEKNKKKDKEKKNKKESGK
SSTP_0000940000.2	2.98649	18	NDSKKKGKDKKKKGKNSK
SSTP_0000940000.2	3.13991	45	NEDDQKENDKKKKKGKKEKKEKEKEGEKEKEKKEKKGKKGKKGKK
SSTP_0000940000.2	2.68694	17	ESRDSKKKKDSVKGKEN
SSTP_0000946400.1	2.79024	18	RKSRRERRRREQEQQKKR
SSTP_0000946500.1	2.89877	16	RRSRRERRRREREQQK
SSTP_0000946600.1	2.55154	20	GQERRRRQREQQTKRAERAK
SSTP_0000946700.1	2.73852	12	GQERRRRQREQQ
SSTP_0000953600.1	2.73353	8	LRRRRKKT
SSTP_0001040300.1	2.71385	21	RRQERRRRQREQQKKRAERAK
SSTP_0001040400.1	2.68325	10	RRSRQERRRR
SSTP_0001040400.1	2.83031	16	SRQERRRREREQQKKR
SSTP_0001040500.1	2.83031	16	SRQERRRREREQQKKR
SSTP_0001040500.1	2.78469	18	RRSRQERRRREREQQKKR
SSTP_0001040600.1	2.83031	16	SRQERRRREREQQKKR
SSTP_0001040700.1	2.6073	11	QKRQSRNRSRN
SSTP_0001040700.1	2.80606	20	RQERRRTEREQQKKRTERRQ
SSTP_0001040700.1	2.80009	16	ERQERRRRQREQQKKR
SSTP_0001073300.1	2.89168	27	EKRRTRGRKQKKSKKTKKSRKSRKSKR
SSTP_0001103800.1	2.56438	13	NEEDNSNEDDSDE
SSTP_0001131100.1	3.18258	12	EKKEKKEKKEKK
SSTP_0001131100.1	2.92492	66	EEPKKKSKKSKNENETIKESKKDKKTDSKKKSKSEDKSESKKESKKKEESDSKKKSKKDKESDSGK
SSTP_0001131200.1	2.84653	27	SKKHESSSSSEEDKKKSKKHKKSKDSK
SSTP_0001270300.1	2.86963	10	RQRRNRRRRN

## Sheet: DE_Overlapping_epitopes
S. stercoralis DE proteins containing predicted epitopes by both bcepred & BepiPred	DE peptide number	BepiPred peptide sequences	DE peptide number	bcepred peptide sequences	Shared sequence (if present)	Overlapping predictions	Peptides with complete sequence identity between the 2 tools
SSTP_0000032300.1	1	TTTTTTTTTTASTTTTPTTTSTTPTTTPAPTTKNGKK	126	RERRERRIRQREQQSRRAERAK
SSTP_0000165100.1	2	QEESSEGDSTSDEDISTSDSSLDDGEVSDSSEDL	127	PSDKKEES
			128	DNKDDSDSQEDLKNKD
			129	DDKNERSDEKVSDSESSQ
			130	NNNEDSSEEDST
SSTP_0000482966.1	9	QANDDYWEKKDKENKTTKSPGP	140	WEKKDKENKTT	WEKKDKENKTT	140 is present in 9	complete ID
SSTP_0000503100.1	10	ETTEQPAEEELPQDSSNSSDDNSDNVEK	144	KNKKSKNHDDFKEKTS
SSTP_0000503100.1	11	EKSEEQSEEQSEEKEQSSSTTTTTTTASTTSKTTT	145	PEKSEEQSEEQSEEKEQS
SSTP_0000503100.1	12	ELPTEEDDNDSAED	146	PEKSEEQSEEEPEEKEQS	EKSEEQSEEEPEEKEQS	146 and 14 overlap
SSTP_0000503100.1	13	TEPPTEDELPQDSSNSSDDNSDNVEK	147	PKSKSNKNK
SSTP_0000503100.1	14	EKSEEQSEEEPEEKEQSSSTTTTTTTTTSSTTSTTTTTTASTT	148	LPEKSEEEPEKEPEEEPEKEAQ	LPEKSEEEPEKEPEEEPEKEAQ	148 is present in 15	complete ID
SSTP_0000503100.1	15	ELPQKSSNSPDNNSDDVEINEEPTTPSERLPEKSEEEPEKEPEEEPEKEAQSSSTTTTTTTTTSSTTSTTTTTTATTTK	149	PKSESKKNK	PKSESKKNK	149 is present in 16	complete ID
SSTP_0000503100.1	16	TTTGKPKSESKKNK
SSTP_0000503100.1	17	SNSPDNNSNNVETNEESATPSEPLPEEPAVESKEESVEEPVEEAKSSSTTT
SSTP_0000504200.1	19	VKPGNPGGPGKPGNSNGSNNPGNSGGTKKPPQTTKPSKPKPSKPSKPSRP	150	LKKRQRGRRRERGRR
SSTP_0000506600.1	20	KKNEEEVPKDPPGSEEDKN	156	RSSKKKQQARNRQKQRRRAQ
SSTP_0000506600.1	21	EEKEKVTPKNPDKAEEND	157	LEKEKKKNEEEVPKDPPGSEEDK	KKNEEEVPKDPPGSEEDKN	20 is present in 157	complete ID
			158	LRNSKRRQQARNRQKQRRQAQKSRQRQ
SSTP_0000506700.1	22	KKEEKDSKEKDSKEKNSKEKDKSNED	159	TKRKQQARNRQKQRRQAQ
			160	ARERETERR
			161	KEEKKKEEKDSKEKDSKEKNSKEKDKS	KKEEKDSKEKDSKEKNSKEKDKS	161 and 22 overlap
SSTP_0000506800.1	23	KKNEKEGLEDPADSEEDKKAKKD	162	EEERKKNEK
			163	DSEEDKKAKK	DSEEDKKAKK	163 is present in 23	complete ID
SSTP_0000506900.3	24	PQGPPPLPP	164	AHKRERERR
SSTP_0000506900.3	25	RGPPPPRLPPPPGLPPPPRGGG	165	RARERERERR
SSTP_0000506900.3	26	KKNEKDPSDGKGSNEDKGSEEN	166	EEERKKNEKDPSDGKGSNEDKGS
SSTP_0000507300.1	27	KASNSSKSDGNSKDEKKNE	167	SNSSKSDGNSKDEKKN	SNSSKSDGNSKDEKKN	167 is present in 27	complete ID
SSTP_0000507300.1	28	SFENSPNSPNTPTSPNSSNSSNSPEPSLE
SSTP_0000509500.1	29	KEKEKVPPENPDDAKEN	168	RNSKRKQQARNRQKQRRQAQKSRQ
SSTP_0000538100.1	30	RSPKKDKKSKSTKKKEKNEQVEEPAGNGDQ	172	NKRSPKKDKKSKSTKKKEK	RSPKKDKKSKSTKKKEK	172 and 30 overlap
SSTP_0000538100.1	31	GPNGGGFGGPNGGGFY	173	IRQKKKESKEKKKKMKEKRKRKREERRKRYE
SSTP_0000666500.1	36	EEEPEAERGRDRDGVPEVRGPDRGEV	174	KRQSKKLRRRS
			175	REDERRERER
			176	GEEDERRIRDREEEPEAERGR	EEEPEAERGR	176 and 36 overlap
SSTP_0000674400.1	40	EKNSQTTTESTTSTS	178	RARRESERREQER
SSTP_0000674400.1	41	EEERERNPDDPRNERQPPDEARN	179	REEEERERNPDDPRN	EEEERERNPDDPRN	179 and 41 overlap
SSTP_0000677200.1	44	PPLPPPEDDDG	180	RVKRRRKKGKKSKTKR
SSTP_0000677200.1	45	ERPPRPPPLSEEDDKK
SSTP_0000677300.1	46	GPPPLPPPSAEYEYGEDDEDTAE	181	RRKRERERQR
SSTP_0000677300.1	47	GPSRRRPQSPRGQQRPQRR
SSTP_0000677300.1	48	RGPPPRPPLPEPEEDEYEYEDEDDV
SSTP_0000700800.1	55	SKKSKKSENSEKSENSEKSE	183	KPEKPKKSKKHRKSKRSKKHRKSKKSKKSKKSENSEKSENSEK	SKKSKKSENSEKSENSEK	55/57 and 183/185 overlap
SSTP_0000701400.1	57	SKKSKKSENSEKSENSEKSE	185	KPEKPKKSKKHRKSKRSKKHRKSKKSKKSKKSENSEKSENSEK
SSTP_0000808800.1	62	QKNQKDQKNQKDQKNQKDQKNQKDQ	187	EQKNQKDQKNQKDQKNQKDQKNQKD	QKNQKDQKNQKDQKNQKDQKNQKD	62 and 187 overlap
SSTP_0000811600.1	63	IRKPGPKKPIKKPIRKPGPKKPIKKPIKKPGPKRPIKIKPGPKPIKPTVKPAPKTTTAAPEEPEEPEEPEDPEEPEEPEEPEDPEEPEDPEEPEESEEPEEPEESEELEEPEESEELEEPEESEEPEEPRDNDDGVDEEDERE	188	EEPEEPEDPEEPEEPEEPEDPEEPEDPEEPEESEEPEEPEE	EEPEEPEDPEEPEEPEEPEDPEEPEDPEEPEESEEPEEPEE	188 is present in 63	complete ID
			189	EESEEPEEPRDNDDGVDEED	EESEEPEEPRDNDDGVDEED	189 is present in 63	complete ID
SSTP_0000828100.1	64	NKTEENKEKGMEEKEKEKEKKKEKKKEKKKEKEKKKEKEKKKEKDSKKKSTKKEKKKEKKEENEENTTPT	190	PKEEKGKKEEKNEK
SSTP_0000828100.1	65	PKSNPGTNIHPIPQPGPNQNSSLPPQPIPDTNSTTSTNSTSQNNNIPNGNSNG	191	KTEENKEKGMEEKEKEKEKKKEKKKEKKKEKEKKKEKEKKKEKDSKKKSTKKEKKKEKKEENE	KTEENKEKGMEEKEKEKEKKKEKKKEKKKEKEKKKEKEKKKEKDSKKKSTKKEKKKEKKEENE	191 is present in 64	complete ID
SSTP_0000828100.1	66	GEGNDHSQDYEGDYKEKEEEESDEE	192	YKEKEEEESDEE	YKEKEEEESDEE	192 is present in 66	complete ID
SSTP_0000828400.1	67	TPQGNNANSGANDDDYYD	194	QRKRGKQQREKQRQQHK
			195	RQKKIREERER
SSTP_0000863700.1	78	TTQPRPPSSTASPSGPPATSSPGSTAGPGKPGNNTSPGNPGTPGKPGGAS	198	RKGRKERQQRRRRQR
SSTP_0000940000.2	79	DKKSKKEKKKEKKEKKGKGKGKEKDSKSTTKDPLE	199	DKKKDKKSKKEKKKEKKEKKGKGKGKEKDSK	DKKSKKEKKKEKKEKKGKGKGKEKDSK	79 and 199 overlap
SSTP_0000940000.2	80	ETEKNSKKSKGTKGKKNKSDSKNTPSKDSF	200	KKDEKNKKKEKKEKRKKSS
SSTP_0000940000.2	81	EENESKSEKEKAKKKEKKSKKSDSKS	201	ETEKNSKKSKGTKGKKNKSDS	ETEKNSKKSKGTKGKKNKSDS	201 is present in 80	complete ID
SSTP_0000940000.2	82	LSTPKQNPKENKQKSKNKKSNNE	202	NESKSEKEKAKKKEKKSKKSD	NESKSEKEKAKKKEKKSKKSD	202 is present in 81	complete ID
SSTP_0000940000.2	83	STFSEQNPEENKKKNNDKKNKKDNEKKSKST	203	NPKENKQKSKNKKSNNEKDKKLE	NPKENKQKSKNKKSNNE	82 and 203 overlap
SSTP_0000940000.2	84	GNDNKKKGKDKKKKGKNSKSEDVTTT	204	KEKSNEKKNKKENEKKS
SSTP_0000940000.2	85	QNPEKNKKKDKEKKNKKESGK	205	DSDKKKNKKKK
SSTP_0000940000.2	86	PFPEENDSKKKGKDKKKKGKNSKS	206	PEENKKKNNDKKNKKDNEKKS
SSTP_0000940000.2	87	DTSNEDDQKENDKKKKKGKKEKKEKEKEGEKEKEKKEKKGKKGKKGKKDKSATTEDPFA	207	NDNKKKGKDKKKKGKNSK	NDNKKKGKDKKKKGKNSK	207 is present in 84	complete ID
SSTP_0000940000.2	88	GAGGAGGMAGNGDSDNEIPGGPGGPNRRDGNGDFDDSDEDDNDNRITNPNGNNSTG	208	NPEKNKKKDKEKKNKKESGK	NPEKNKKKDKEKKNKKESGK	208 is present in 85	complete ID
SSTP_0000940000.2	89	TNSGSTNNTQSQNPPTRR	209	NDSKKKGKDKKKKGKNSK	NDSKKKGKDKKKKGKNSK	209 is present in 86	complete ID
			210	NEDDQKENDKKKKKGKKEKKEKEKEGEKEKEKKEKKGKKGKKGKK	NEDDQKENDKKKKKGKKEKKEKEKEGEKEKEKKEKKGKKGKKGKK	210 is present in 87	complete ID
			211	ESRDSKKKKDSVKGKEN
SSTP_0000946400.1	90	ERQTTTTPTTTTPTTTTATTTTPTTTPTTTPTTKAPSGSGR	212	RKSRRERRRREQEQQKKR
SSTP_0000946500.1	91	ERQTTTATQTTTTPTTTTATTTTPTTTPTTKAPAVPGVPGGPGVPGGPGVPGGPGVPGGPGVPGGPGVPGGPGVPGGPGP	213	RRSRRERRRREREQQK
SSTP_0000946600.1	92	ERQTTTTSQTTTTTTASTTSITSQPTGPGQPAASGQPAASGQPAASGQPAASGQPAAGGKPAASGKPAAGGKPGSG	214	GQERRRRQREQQTKRAERAK
SSTP_0000946700.1	93	TTTTTQTTTTTTASTATTPTTTATTASTAAPTTPKKTGKK	215	GQERRRRQREQQ
SSTP_0001040300.1	100	QRQTTTTTTTTTTTTSTTTSTTAKPAGPGQPSGPGQPAGPGQPSGPGQPSGPGQPSGPGQPSGPGQPSGPGQPSGPGQPSGPGNPGSGRK	217	RRQERRRRQREQQKKRAERAK
SSTP_0001040400.1	101	TPTTTSATTKAPSGSGQPGPPGPPGPPGPPGPPGVAGPPGPP	218	RRSRQERRRR
SSTP_0001040400.1	102	RQTTTTTTTTATTPTTTTPTTTTPTTTPTTTKAPGIP	219	SRQERRRREREQQKKR
SSTP_0001040500.1	103	ERQTTTTTQTTTTPTTTTPTTTTTATTSTAKPTGGK	220	SRQERRRREREQQKKR
			221	RRSRQERRRREREQQKKR
SSTP_0001040600.1	104	ERQTTTTTTPTTTTPTTTTPTTTTPTTTPGGK	222	SRQERRRREREQQKKR
SSTP_0001040700.1	105	ERQTTTTTTTTTTTATTPTTTTPTTTTPTTTTTATTKATPANPGRK	223	QKRQSRNRSRN
			224	RQERRRTEREQQKKRTERRQ
			225	ERQERRRRQREQQKKR
SSTP_0001103800.1	106	KKPVKPAPKPIKPTPKPIKTTPKSIKTTPKPIKTTPKPIKTTTKTPVT	227	NEEDNSNEDDSDE	NEEDNSNEDDSDE	227 is present in 107	complete ID
SSTP_0001103800.1	107	EYDDEYSDEHDGEYSDEHDGEYDGEYDGEYDGEYDGEYDGEYDGEYDGEYDYEYSNEEDNSNEDDSDENDSN
SSTP_0001131100.1	111	SSEHSVEEGNSEQNSEENQLESASGSSEDDKDNSSNTNDSNDNEKTSQNSGEDNDNE	228	EKKEKKEKKEKK
SSTP_0001131100.1	112	KKEKSSSGSSSSEEEPKKKSKKSKN	229	EEPKKKSKKSKNENETIKESKKDKKTDSKKKSKSEDKSESKKESKKKEESDSKKKSKKDKESDSGK	KDKKTDSKKKSKSEDKSESKKESKKKEESDSKKKSKKDKESDSGK	229 and 113 overlap
SSTP_0001131100.1	113	KDKKTDSKKKSKSEDKSESKKESKKKEESDSKKKSKKDKESDSGKE
SSTP_0001131200.1	114	KKHESSSSSEEDKKKS	230	SKKHESSSSSEEDKKKSKKHKKSKDSK	KKHESSSSSEEDKKKS	114 is present in 230	complete ID
						28	18
